# Supplementary material for: All-Flexible Chronoepifluidic Nanoplasmonic Patch Allows Label-free Sweat Profiling
Source: Research Square preprint supplement (doi:10.21203/rs.3.rs-5624954/v1), 2025-02-12
Supplement: Supplementary file 1 [file 21e55f8070f7b828cda87db6.docx]

Supporting Information

All-Flexible Chronoepifluidic Nanoplasmonic Patch Allows Label-free Sweat Profiling

Jaehun Jeon1,2, Sangyeon Lee1, Seongok Chae3, Joo Hoon Lee4, Hanjin Kim1, Eun-Sil Yu1,2, Hamin Na1,2, Taejoon Kang4, Hyung-Soon Park3, Doheon Lee1, and Ki-Hun Jeong1,2,*

1 Department of Bio and Brain Engineering, Korea Advanced Institute of Science and Technology (KAIST), 291 Daehak-ro, Yuseong-gu, Daejeon 34141, Republic of Korea

2 KAIST Institute for Health Science and Technology (KIHST), KAIST, 291 Daehak-ro, Yuseong-gu, Daejeon, Republic of Korea, 305-701

3 Department of Mechanical Engineering, Korea Advanced Institute of Science and Technology (KAIST), 291 Daehak-ro, Yuseong-gu, Daejeon, 34141, Korea

4 Bionanotechnology Research Center, Korea Research Institute of Bioscience and Biotechnology (KRIBB), 125 Gwahak-ro, Yuseong-gu, Daejeon 34141, Republic of Korea

*kjeong@kaist.ac.kr


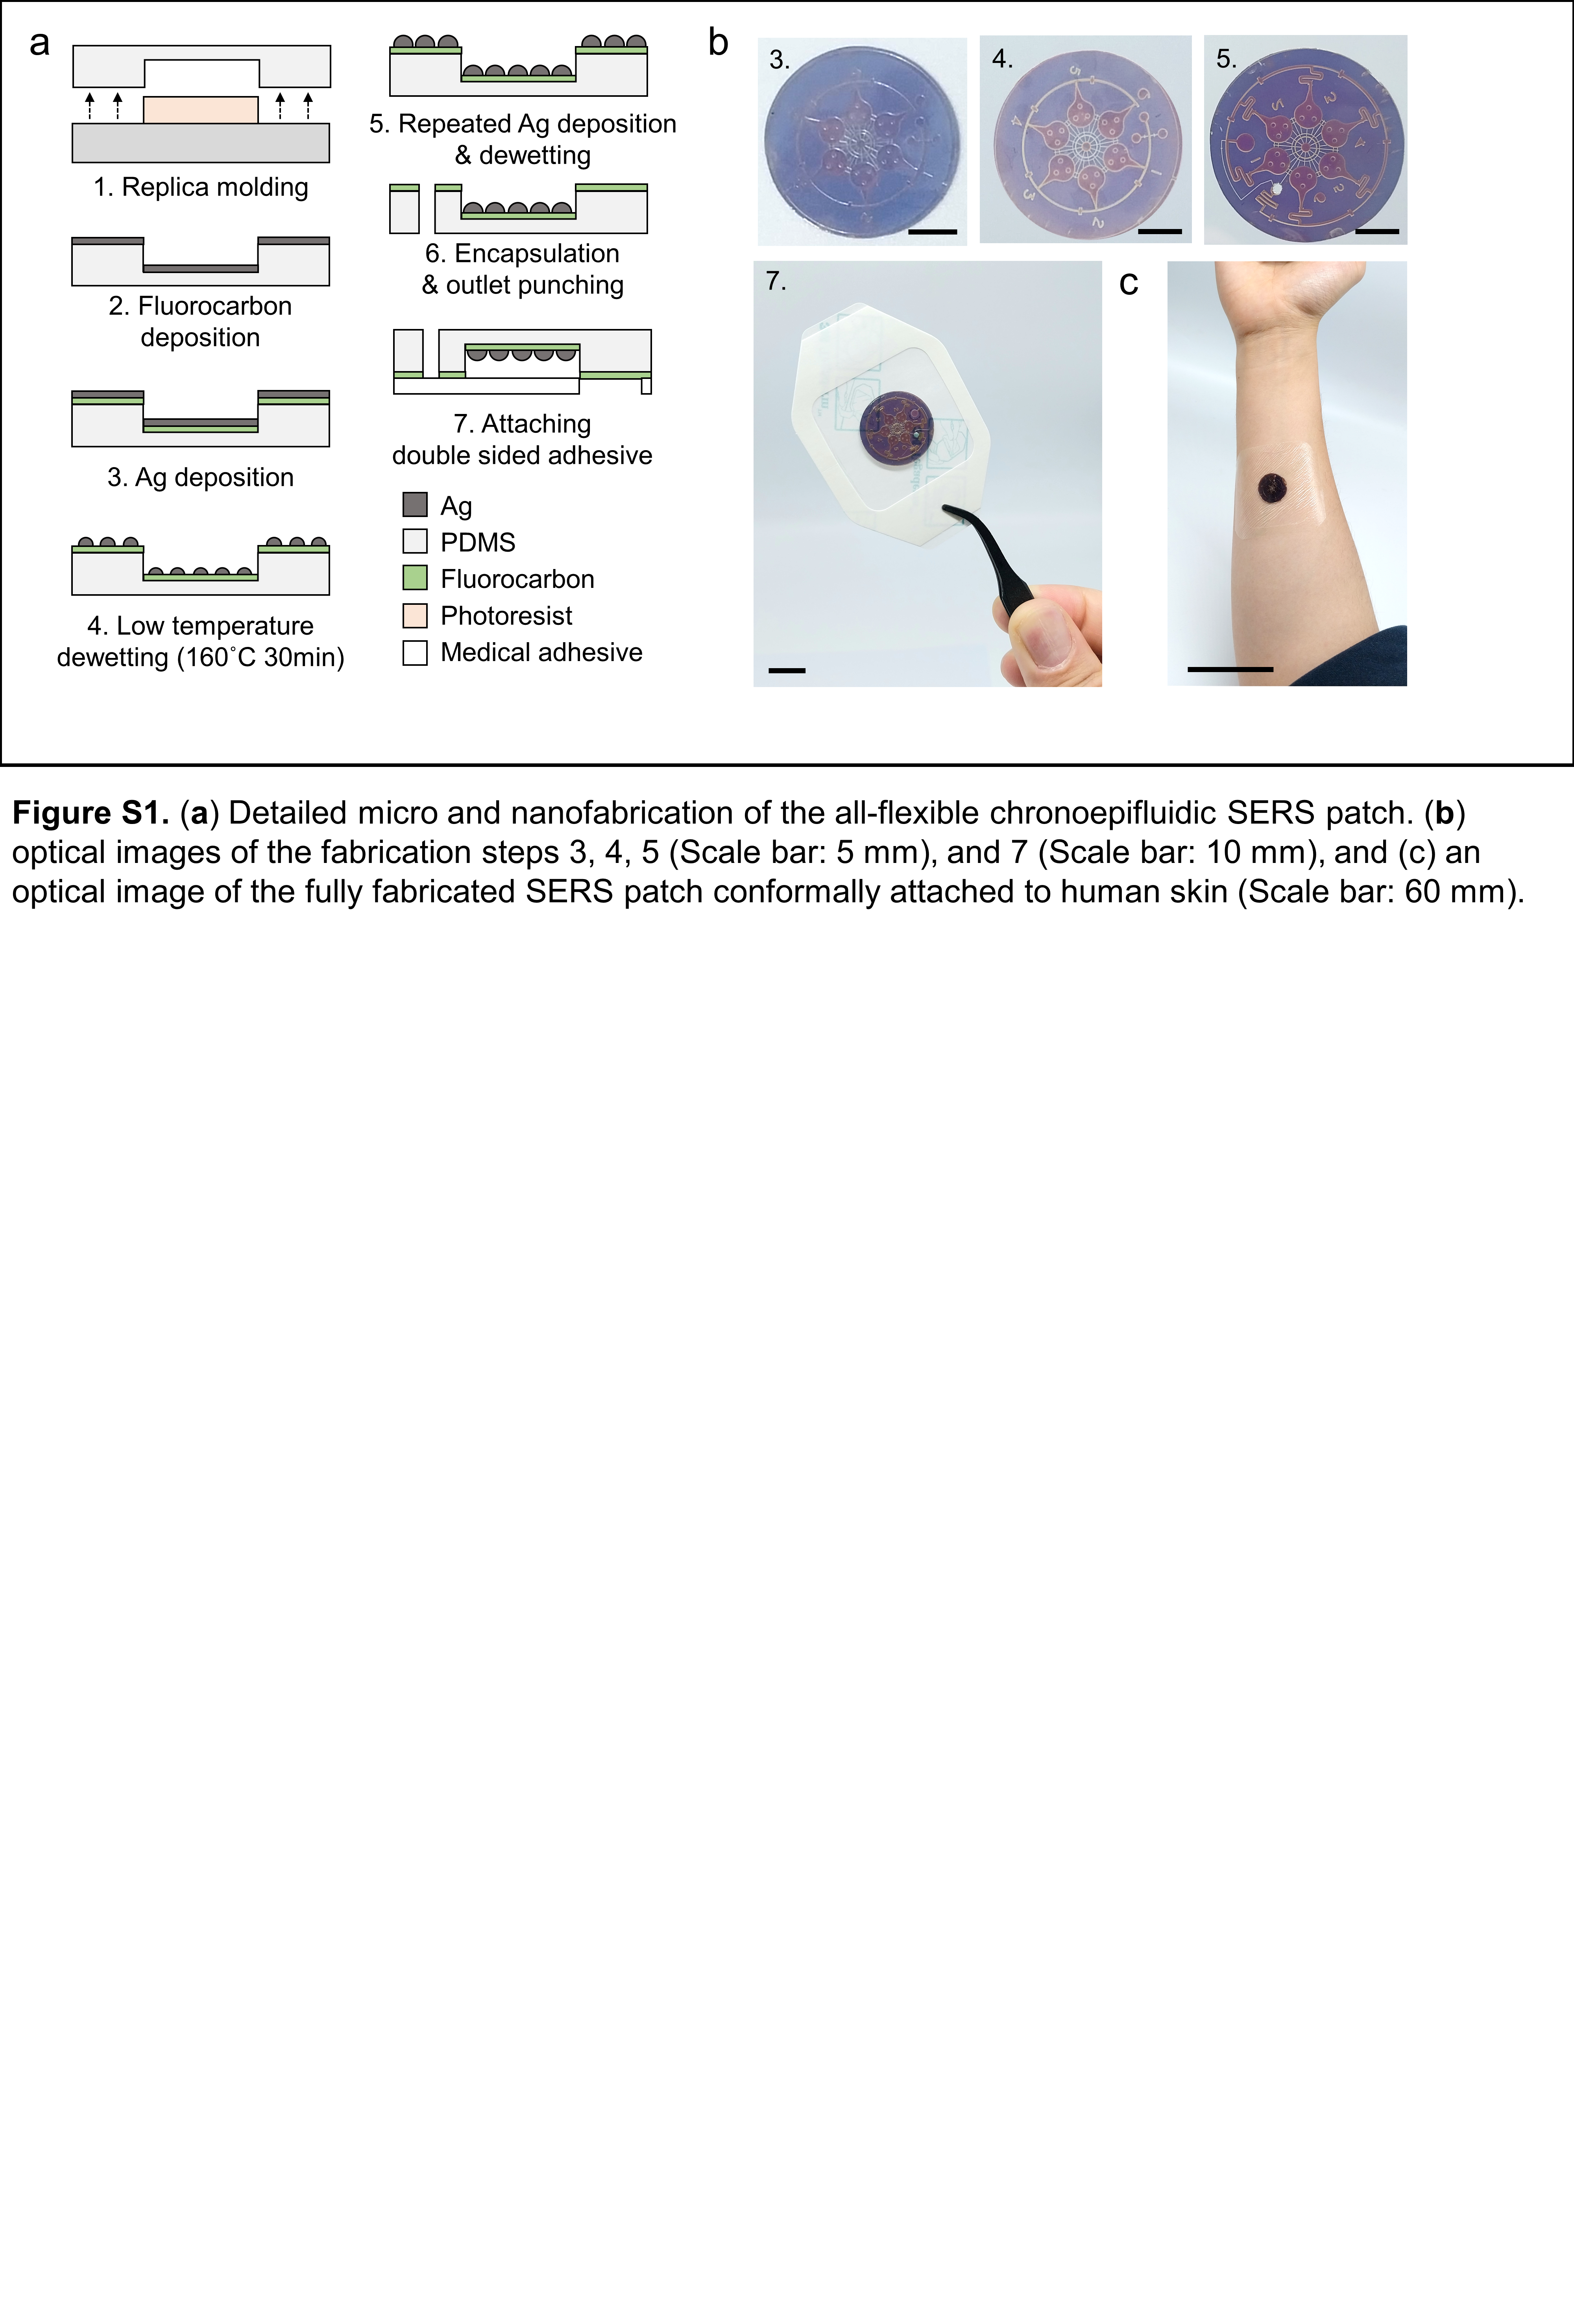


**Figure S1.** (**a**) Detailed micro and nanofabrication of the CEP-SERS patch. (**b**) optical images of the fabrication step 3, 4, 5 (Scale bar: 5 mm), 7 (Scale bar: 10 mm), and (**c**) an optical image of the fully fabricated SERS patch conformally attached to human skin (Scale bar: 60 mm).


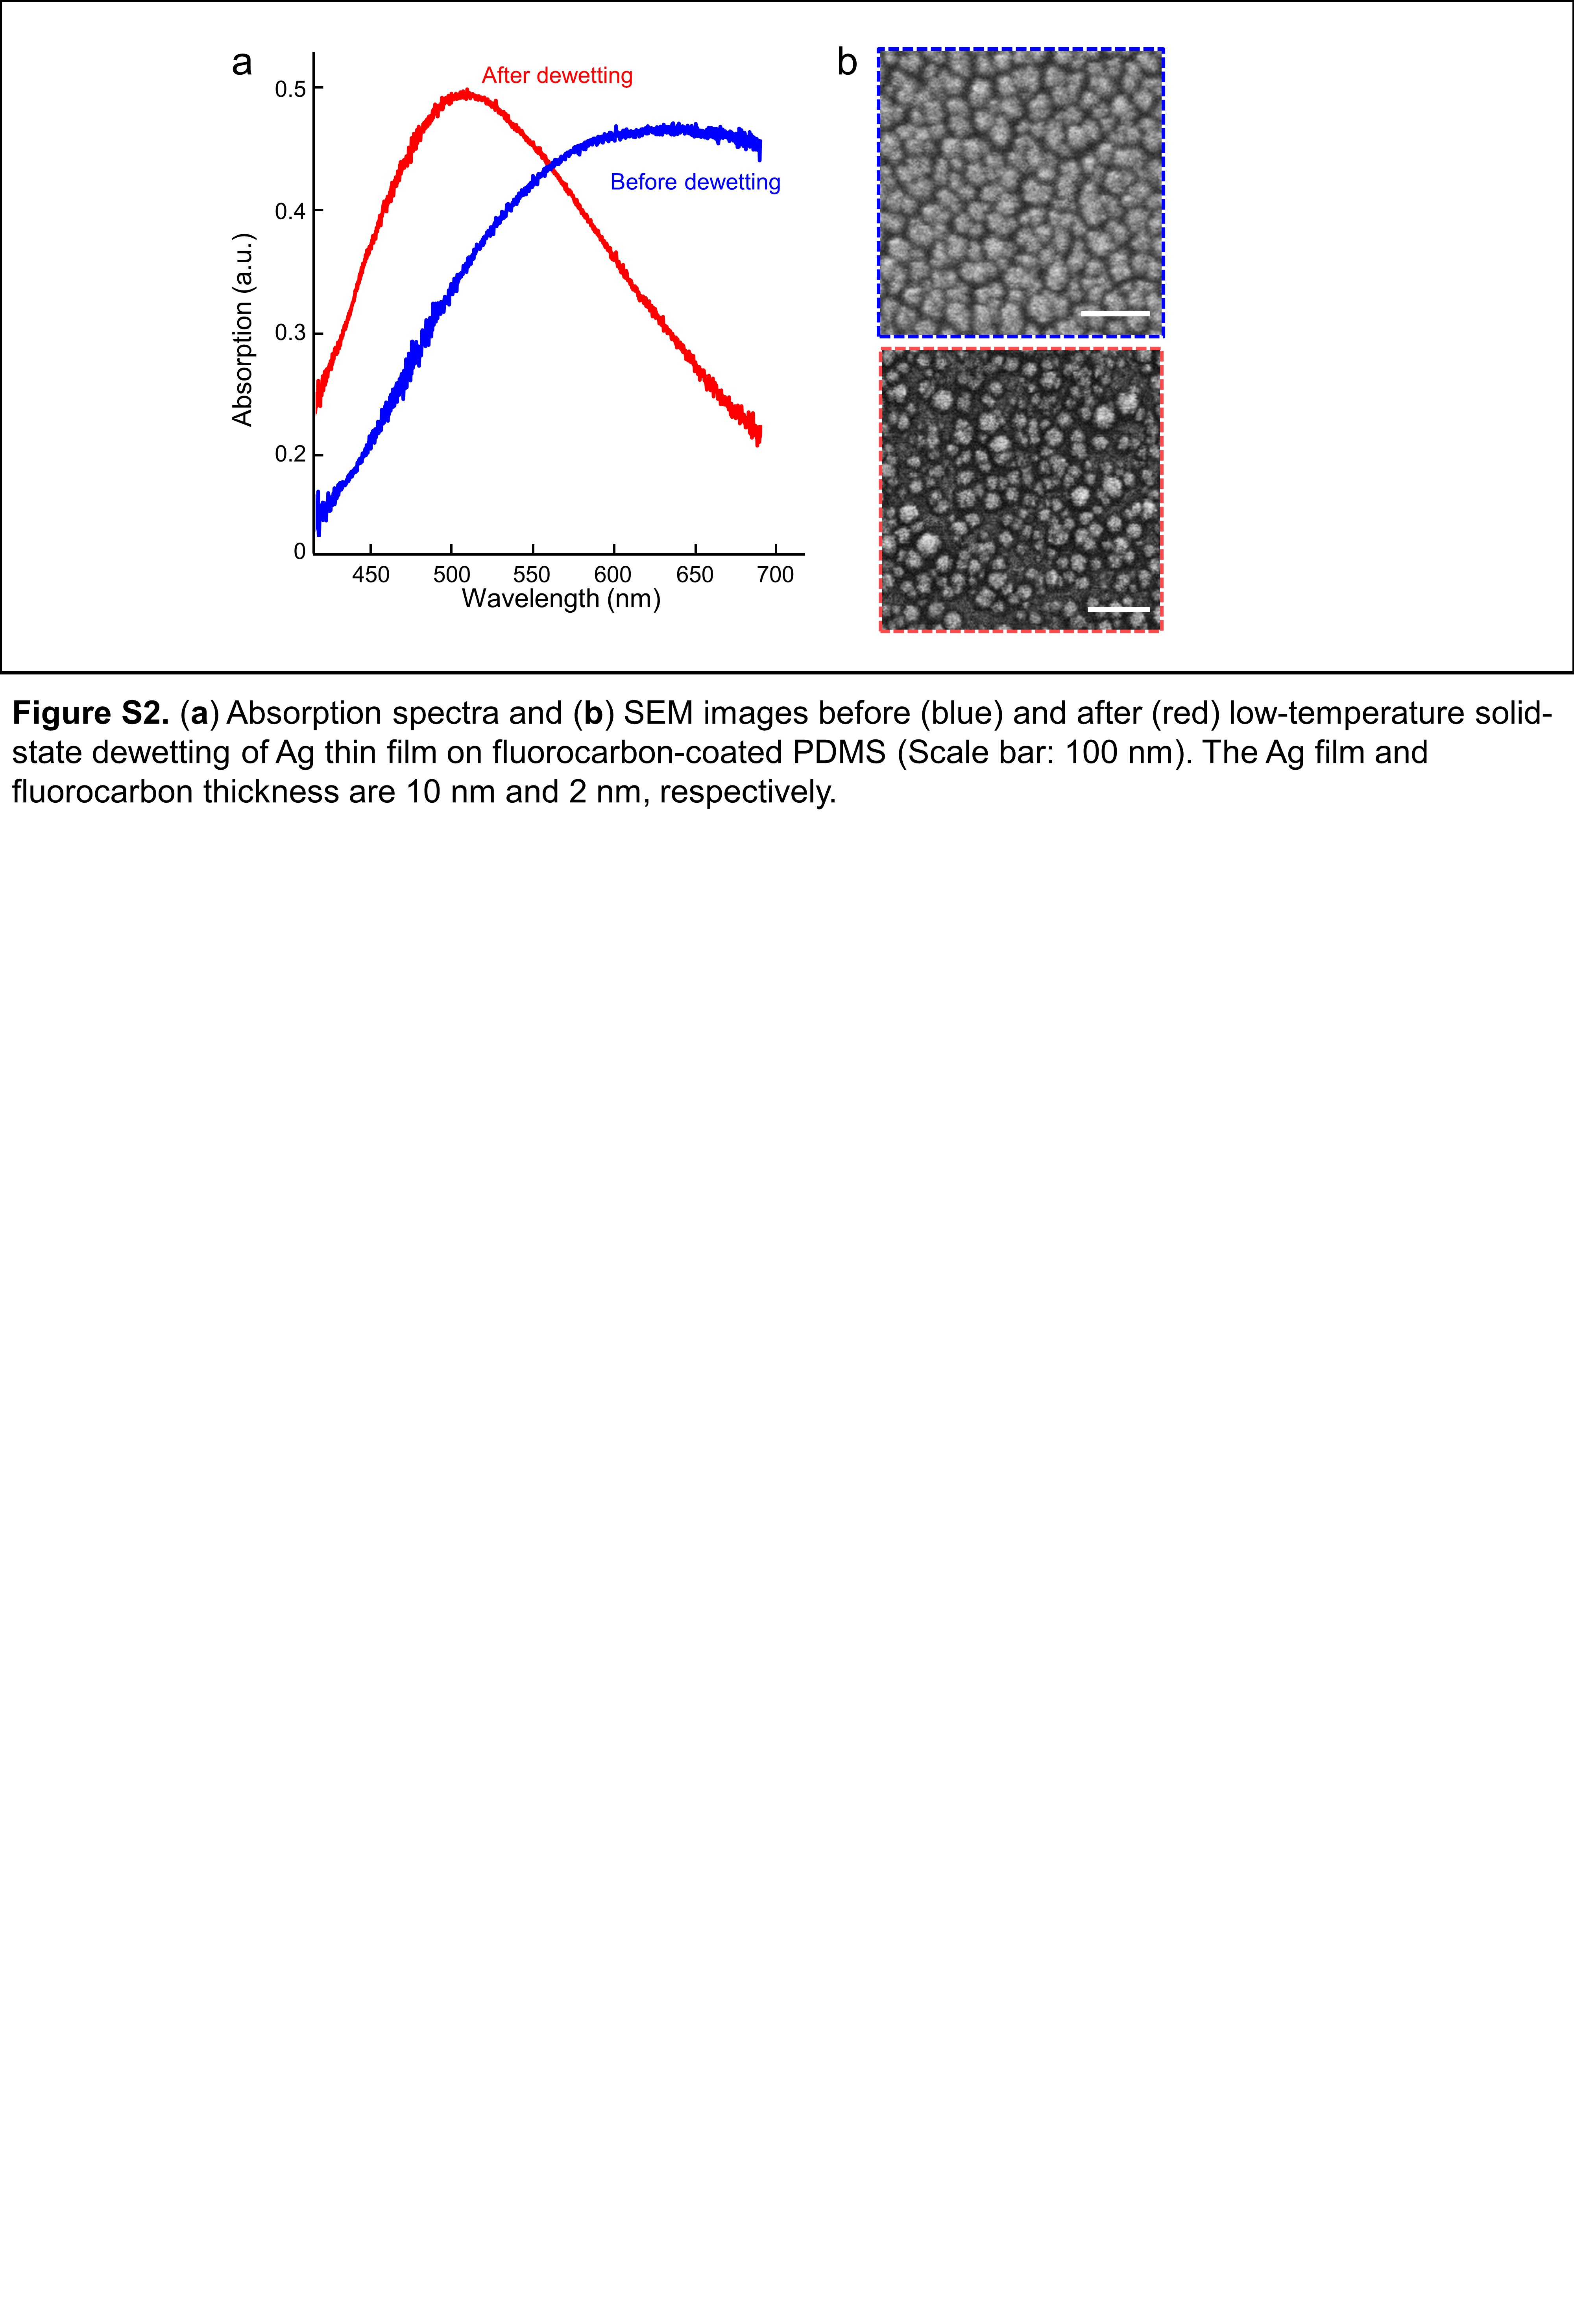


**Figure S2.** (**a**) Absorption spectra and (**b**) SEM images before (blue) and after (red) low-temperature solid-state dewetting of Ag thin film on fluorocarbon-coated PDMS (Scale bar: 100 nm). The Ag film and fluorocarbon thickness are 10 nm and 2 nm, respectively.


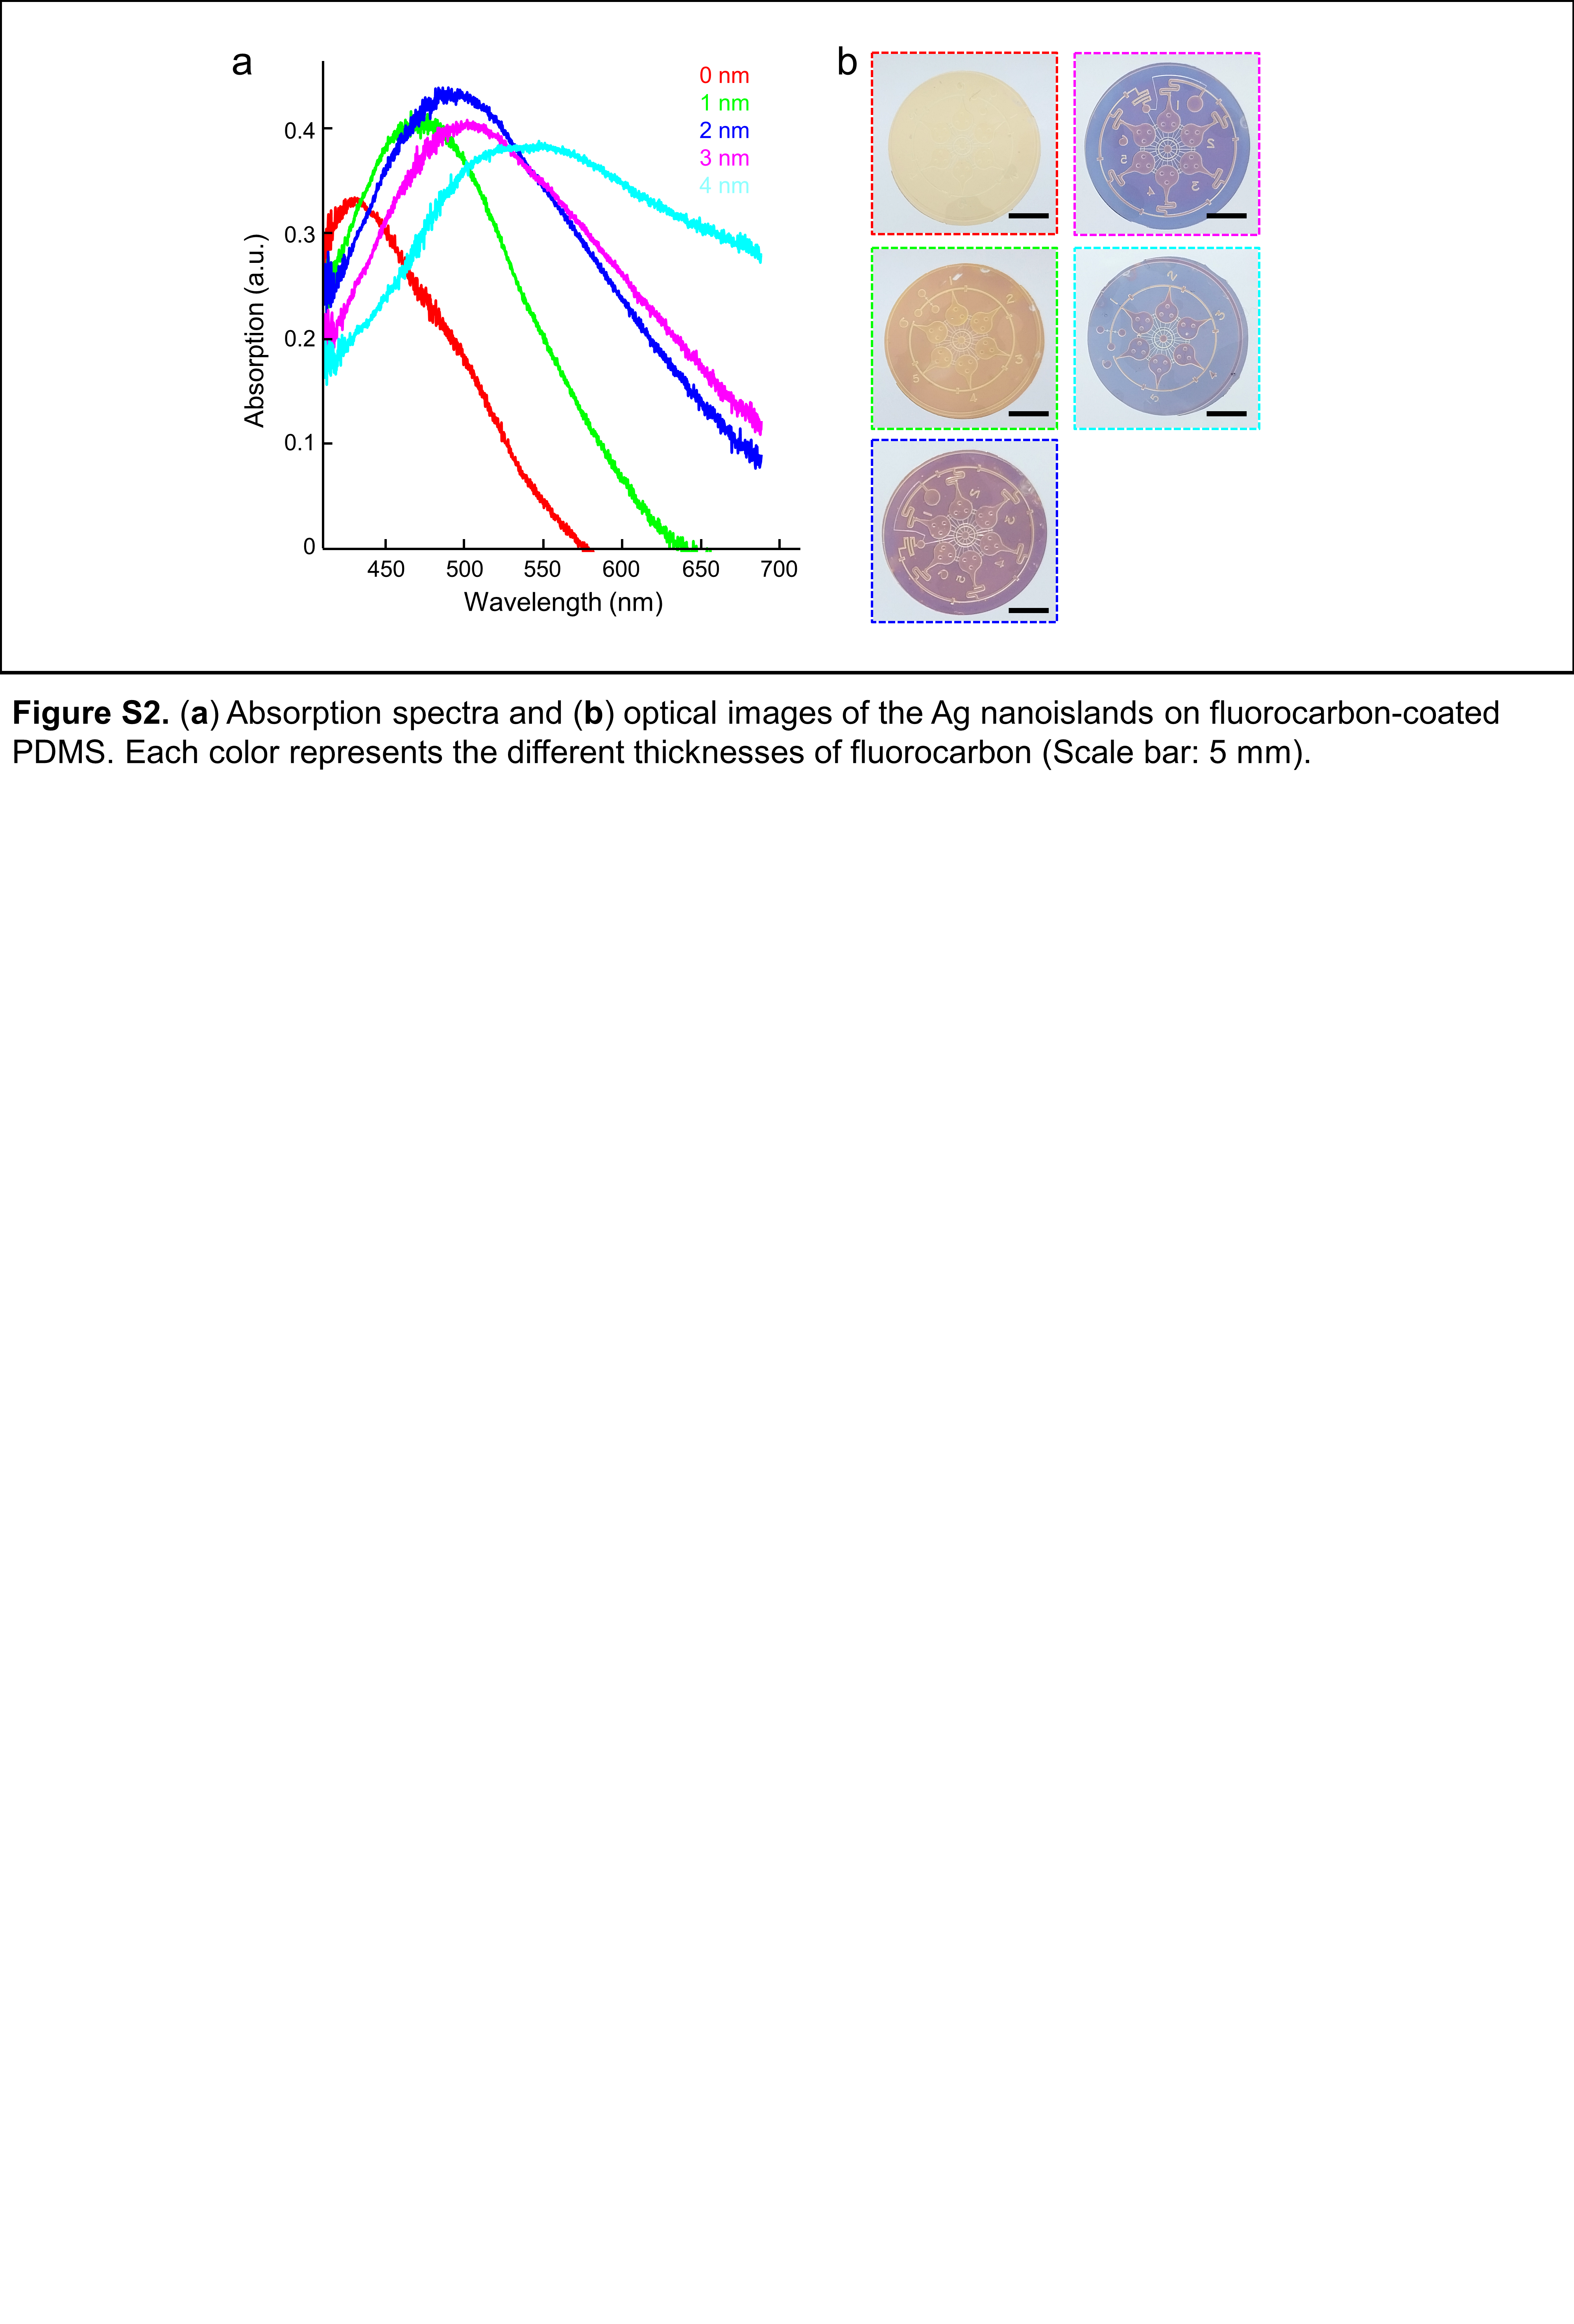


**Figure S3.** (**a**) Absorption spectra and (**b**) optical images of the Ag nanoislands on fluorocarbon-coated PDMS. Each color represents different fluorocarbon thicknesses. (Scale bar: 5 mm).


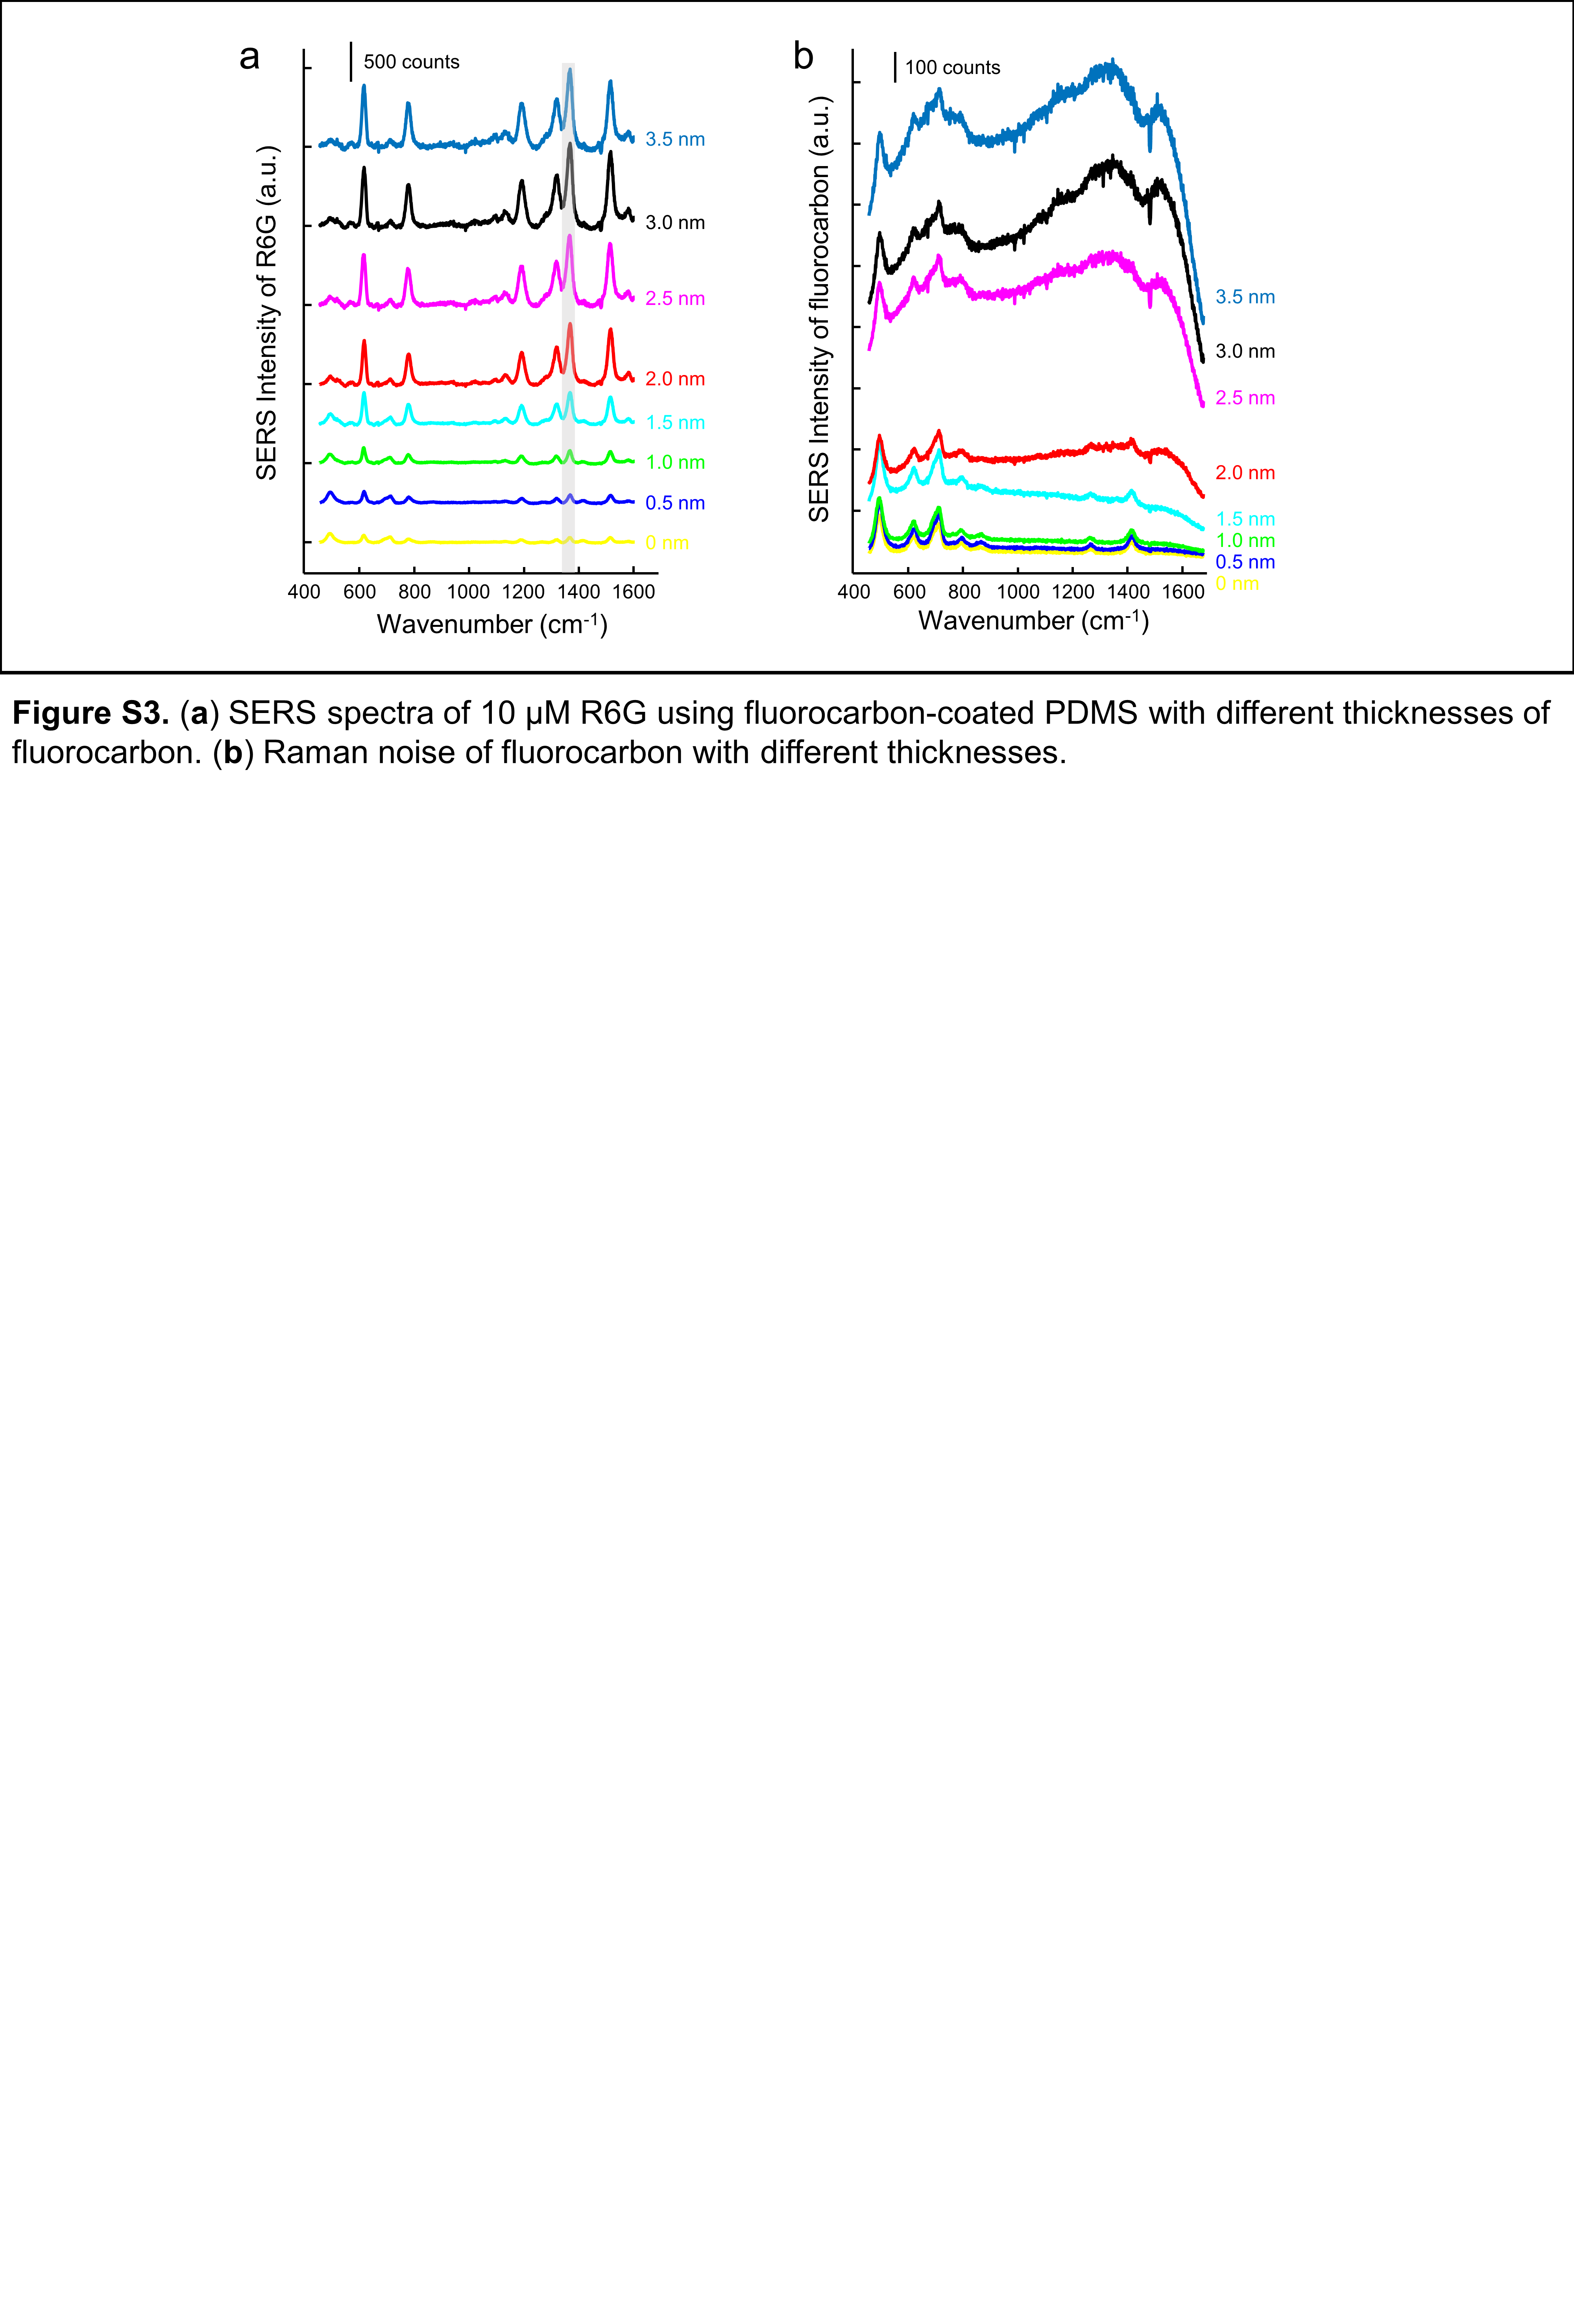


**Figure S4.** (**a**) SERS spectra of 10 μM R6G (**b**) SERS noise spectra of fluorocarbon depending on fluorocarbon thicknesses. The gray bars represent the wavenumber of 1365 cm-1.


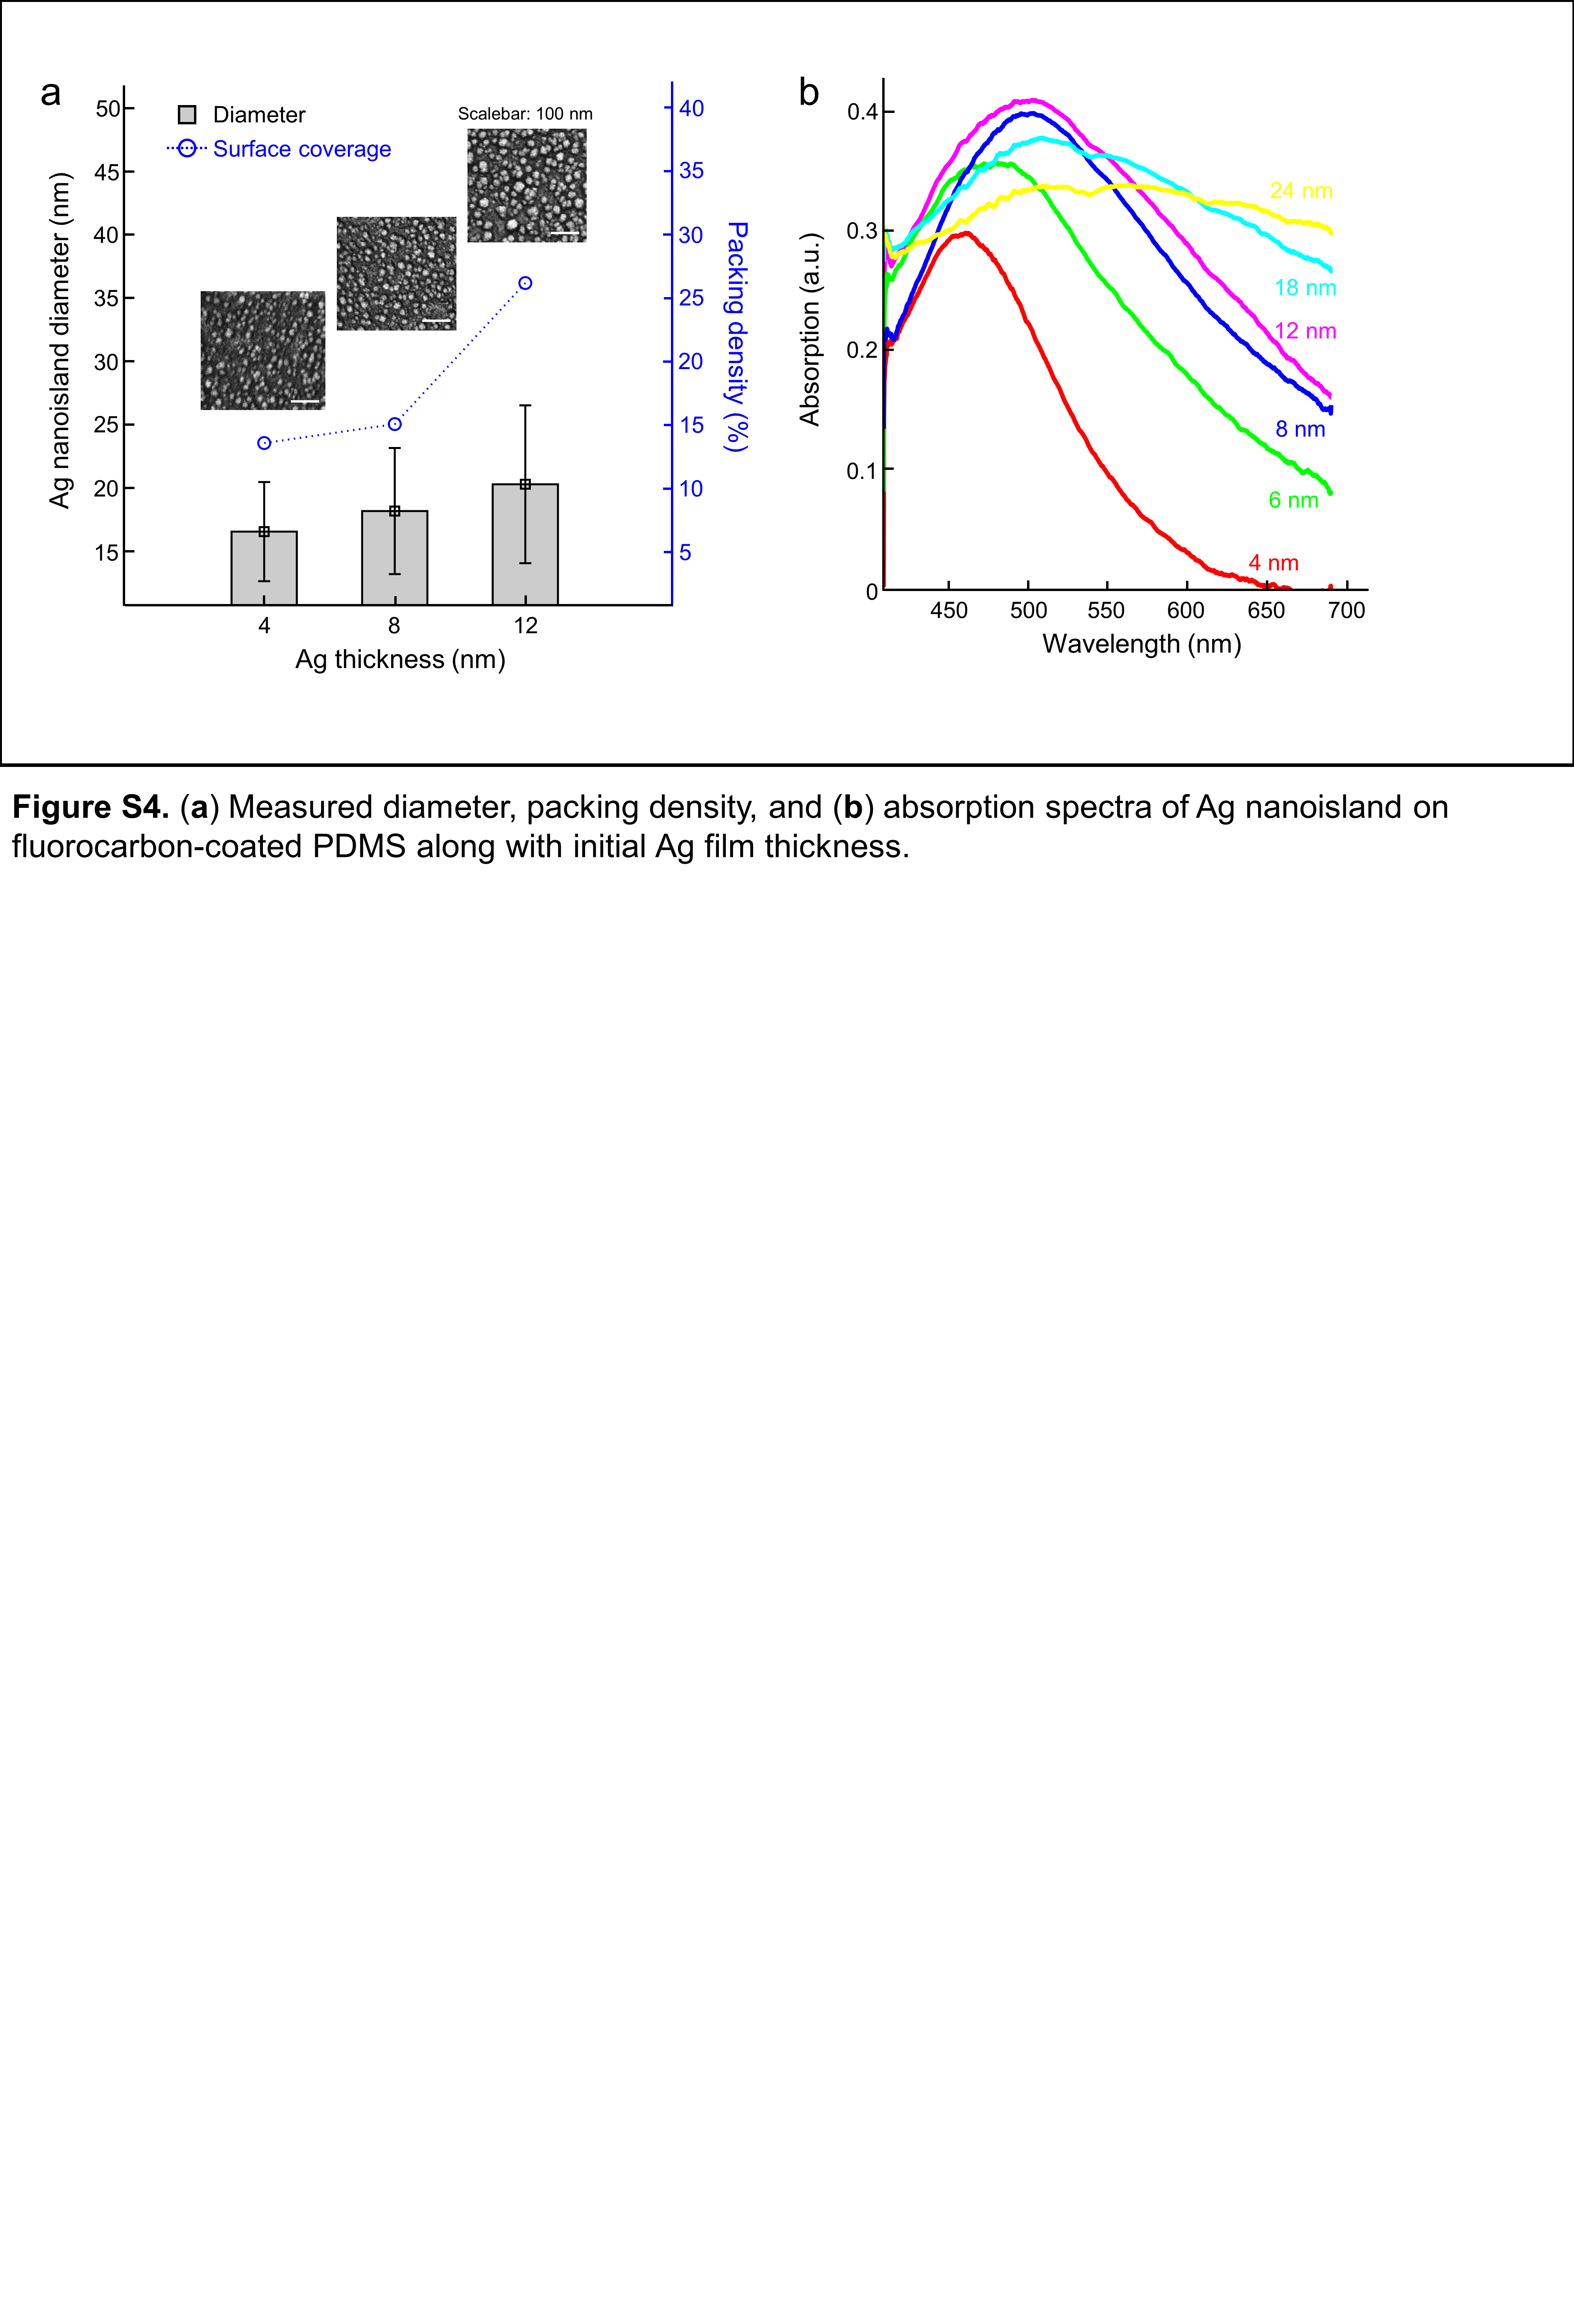


**Figure S5.** (**a**) Measured diameter, packing density, and (**b**) absorption spectra of Ag nanoisland on fluorocarbon-coated PDMS depending on Ag film thickness. The error bars represent one standard deviation from the mean.


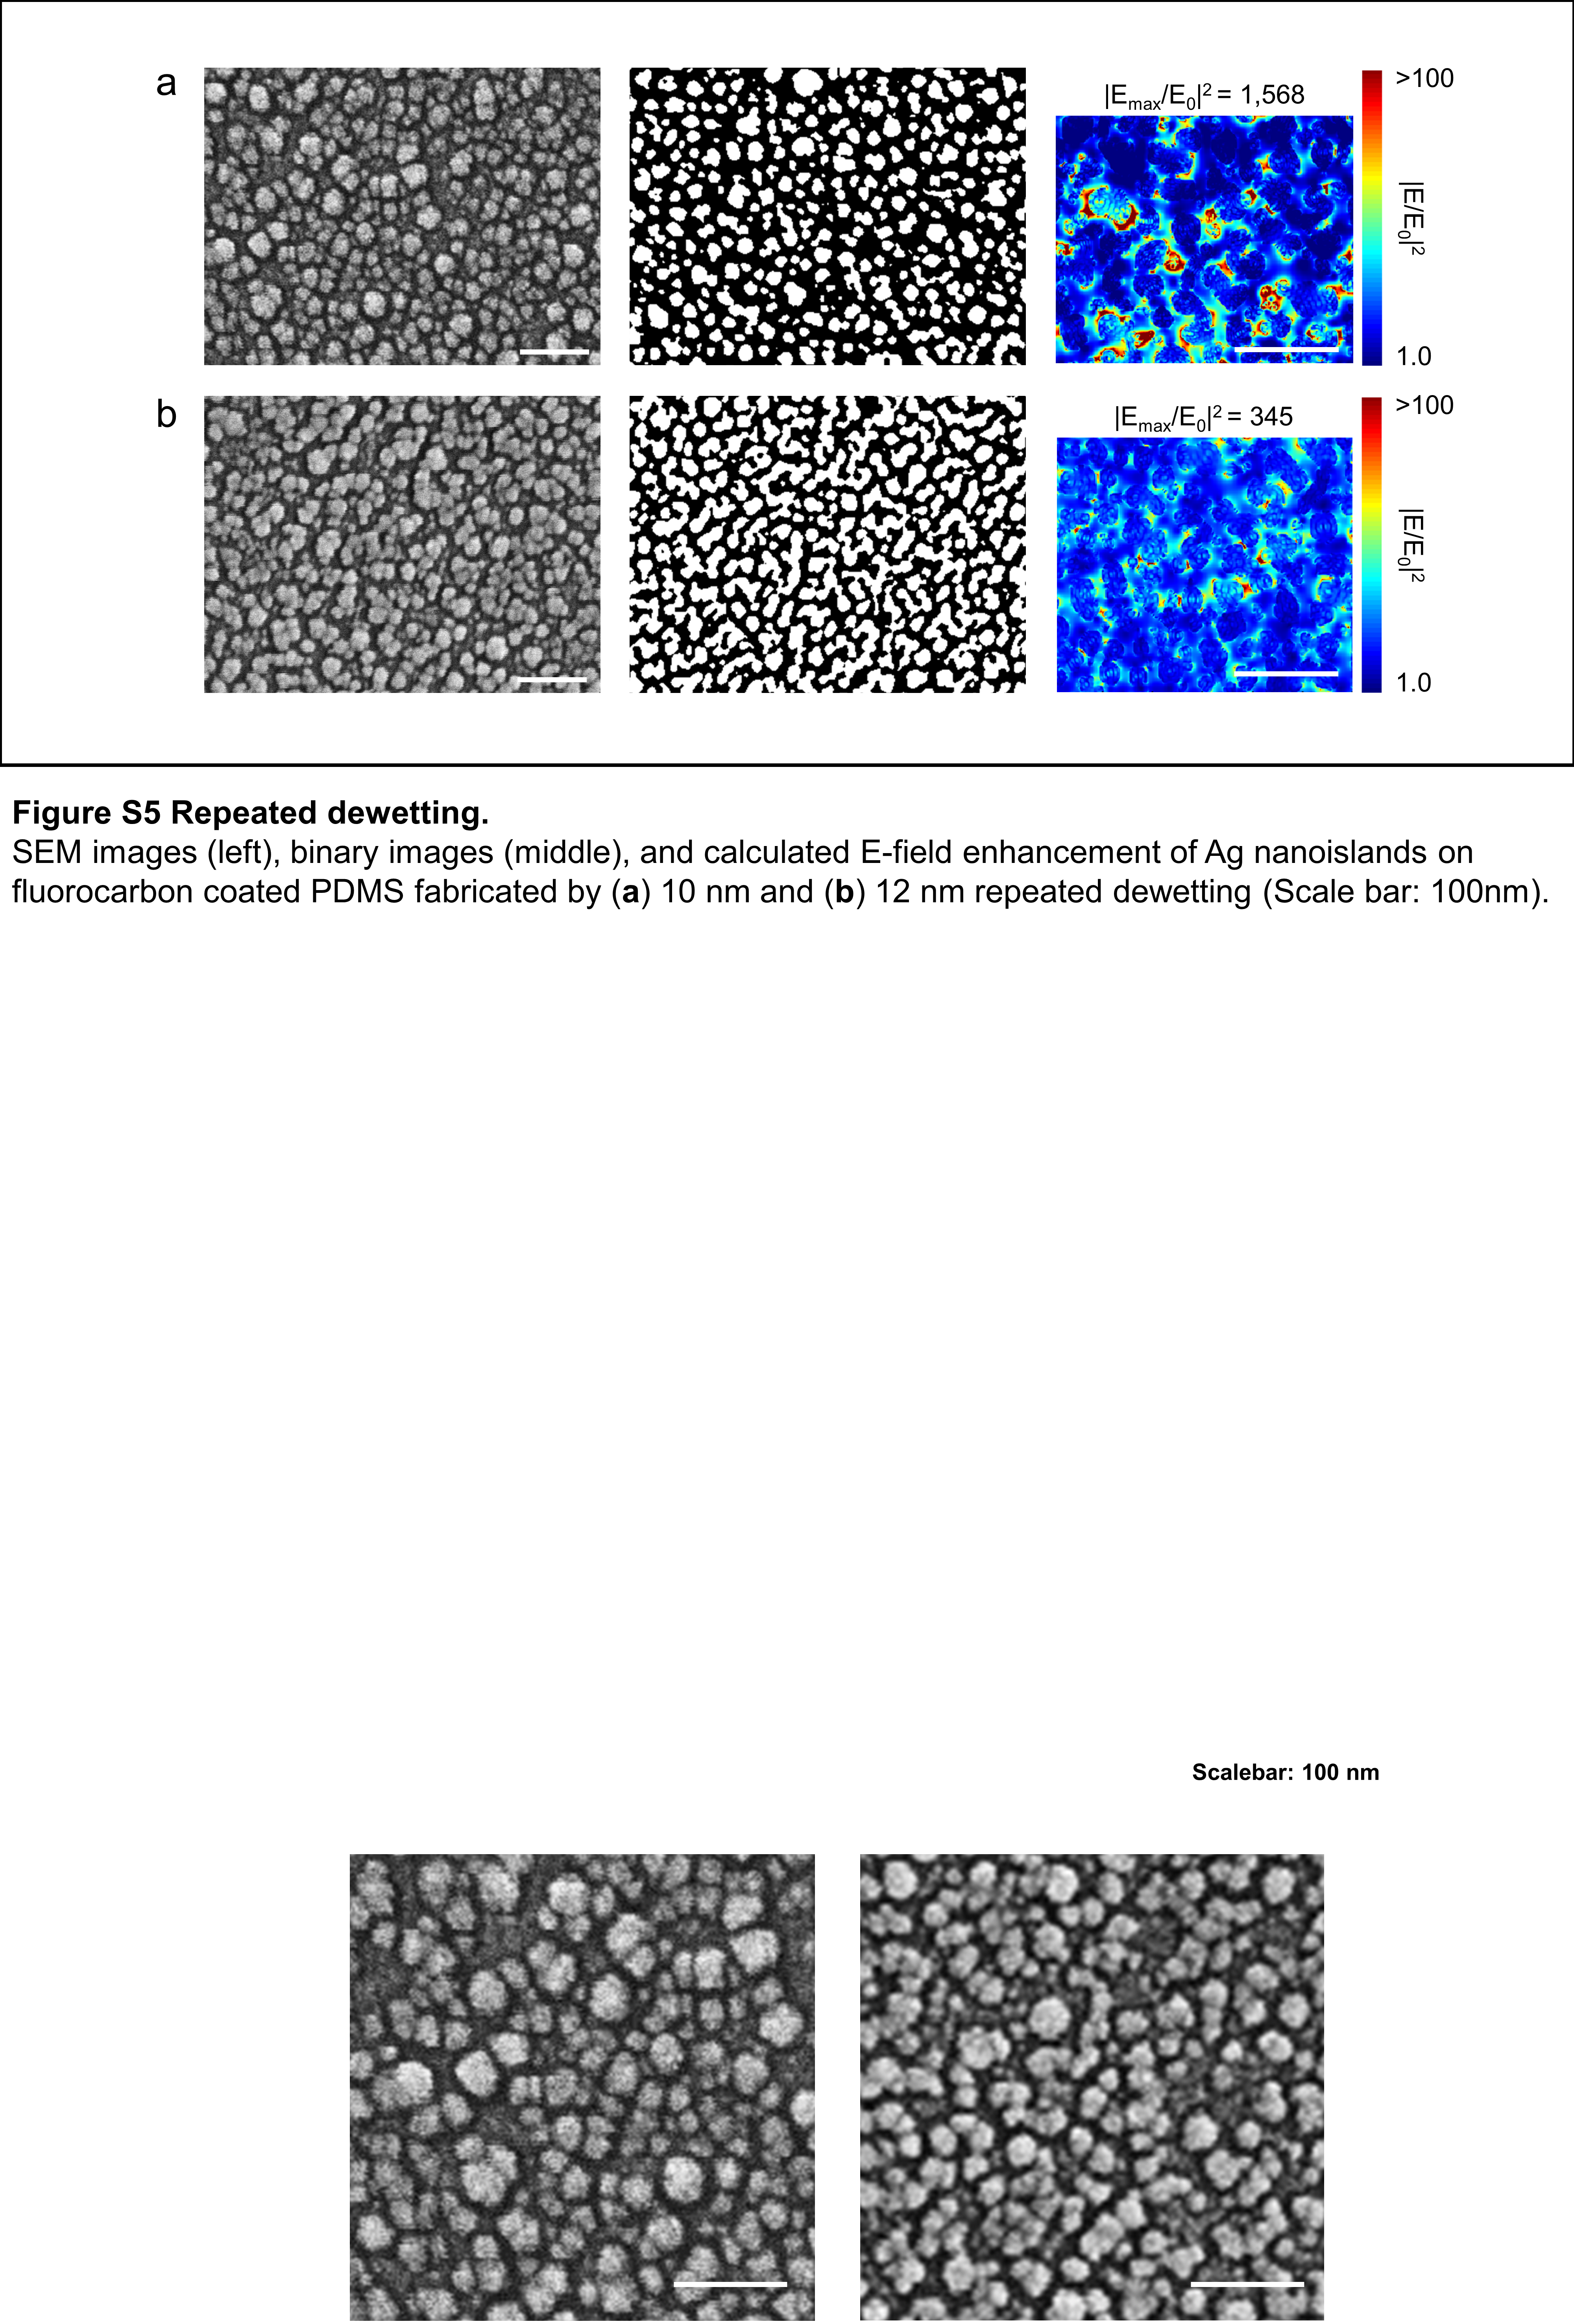


**Figure S6.** SEM images (left), binary images (middle), and calculated E-field enhancement (right) of Ag nanoislands on fluorocarbon-coated PDMS fabricated by (**a**) 10 nm and (**b**) 12 nm repeated dewetting (Scale bar: 100nm).


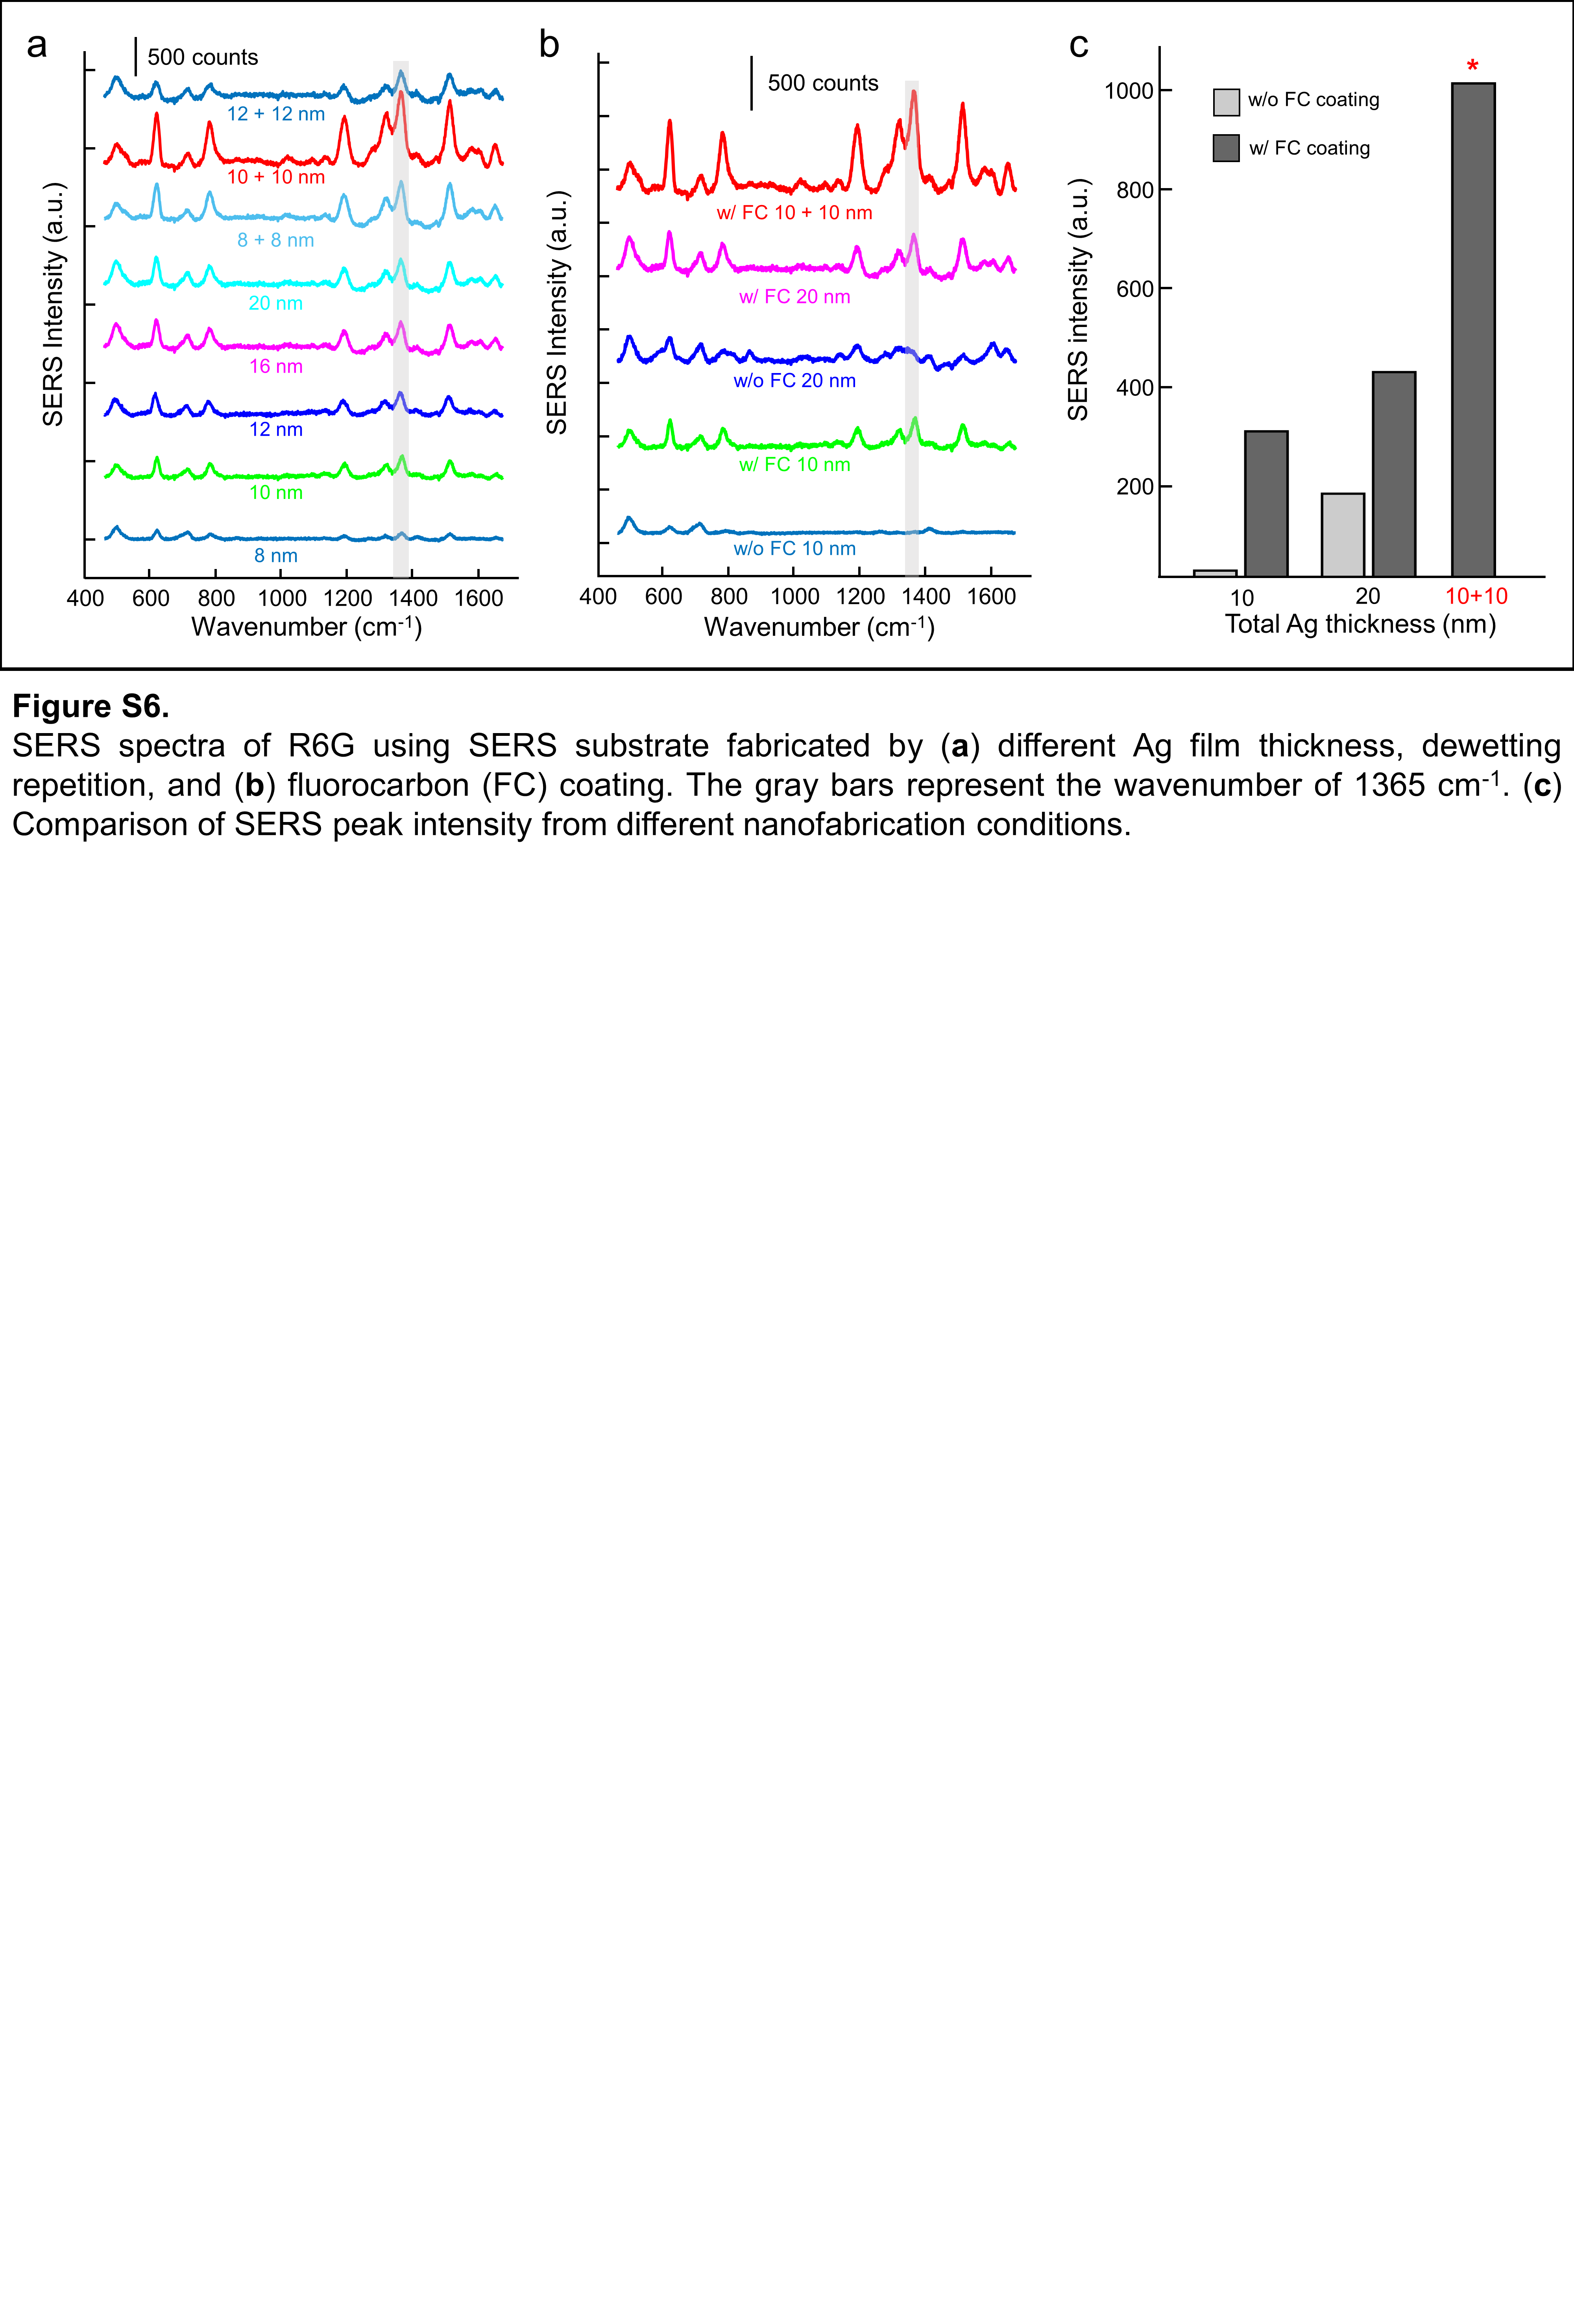


**Figure S7.** SERS spectra of 1 μM R6G using SERS substrate fabricated by (**a**) different Ag film thickness, dewetting repetition, and (**b**) fluorocarbon (FC) coating. The gray bars represent the wavenumber of 1365 cm-1. (**c**) Comparison of SERS peak intensity from different nanofabrication conditions.


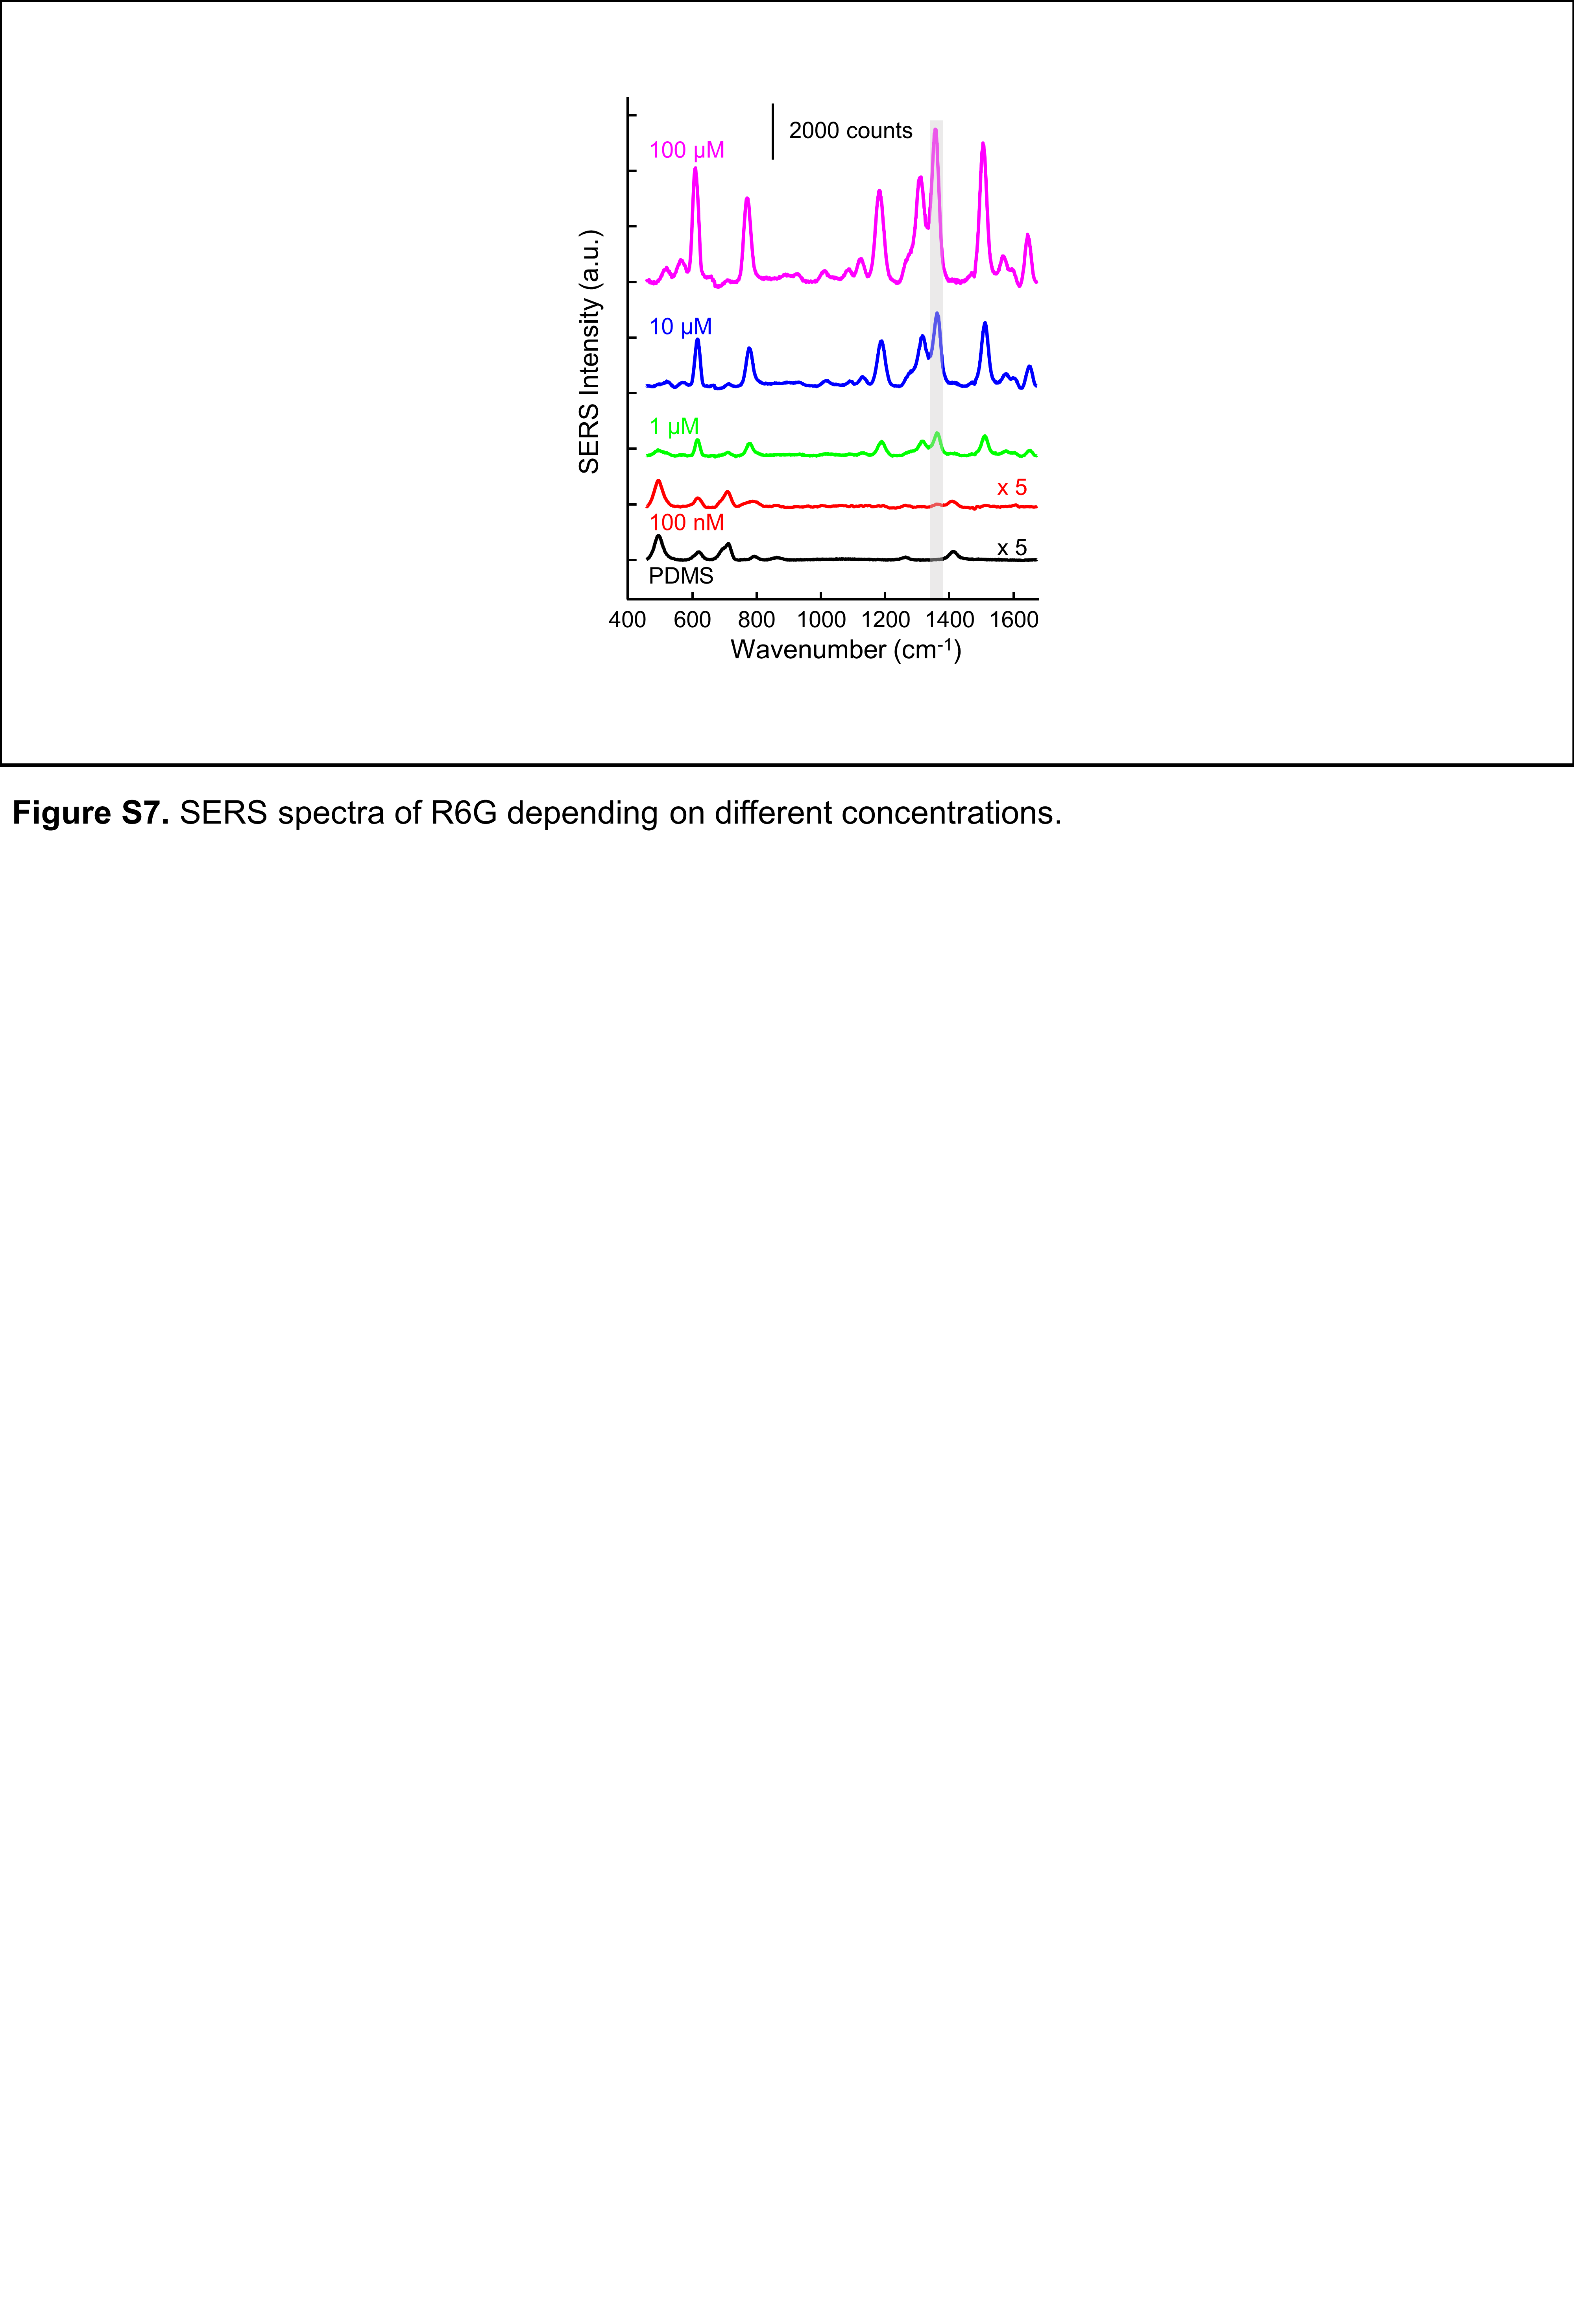


**Figure S8.** SERS spectra of R6G depending on different concentrations. The gray bars represent the wavenumber of 1365 cm-1.


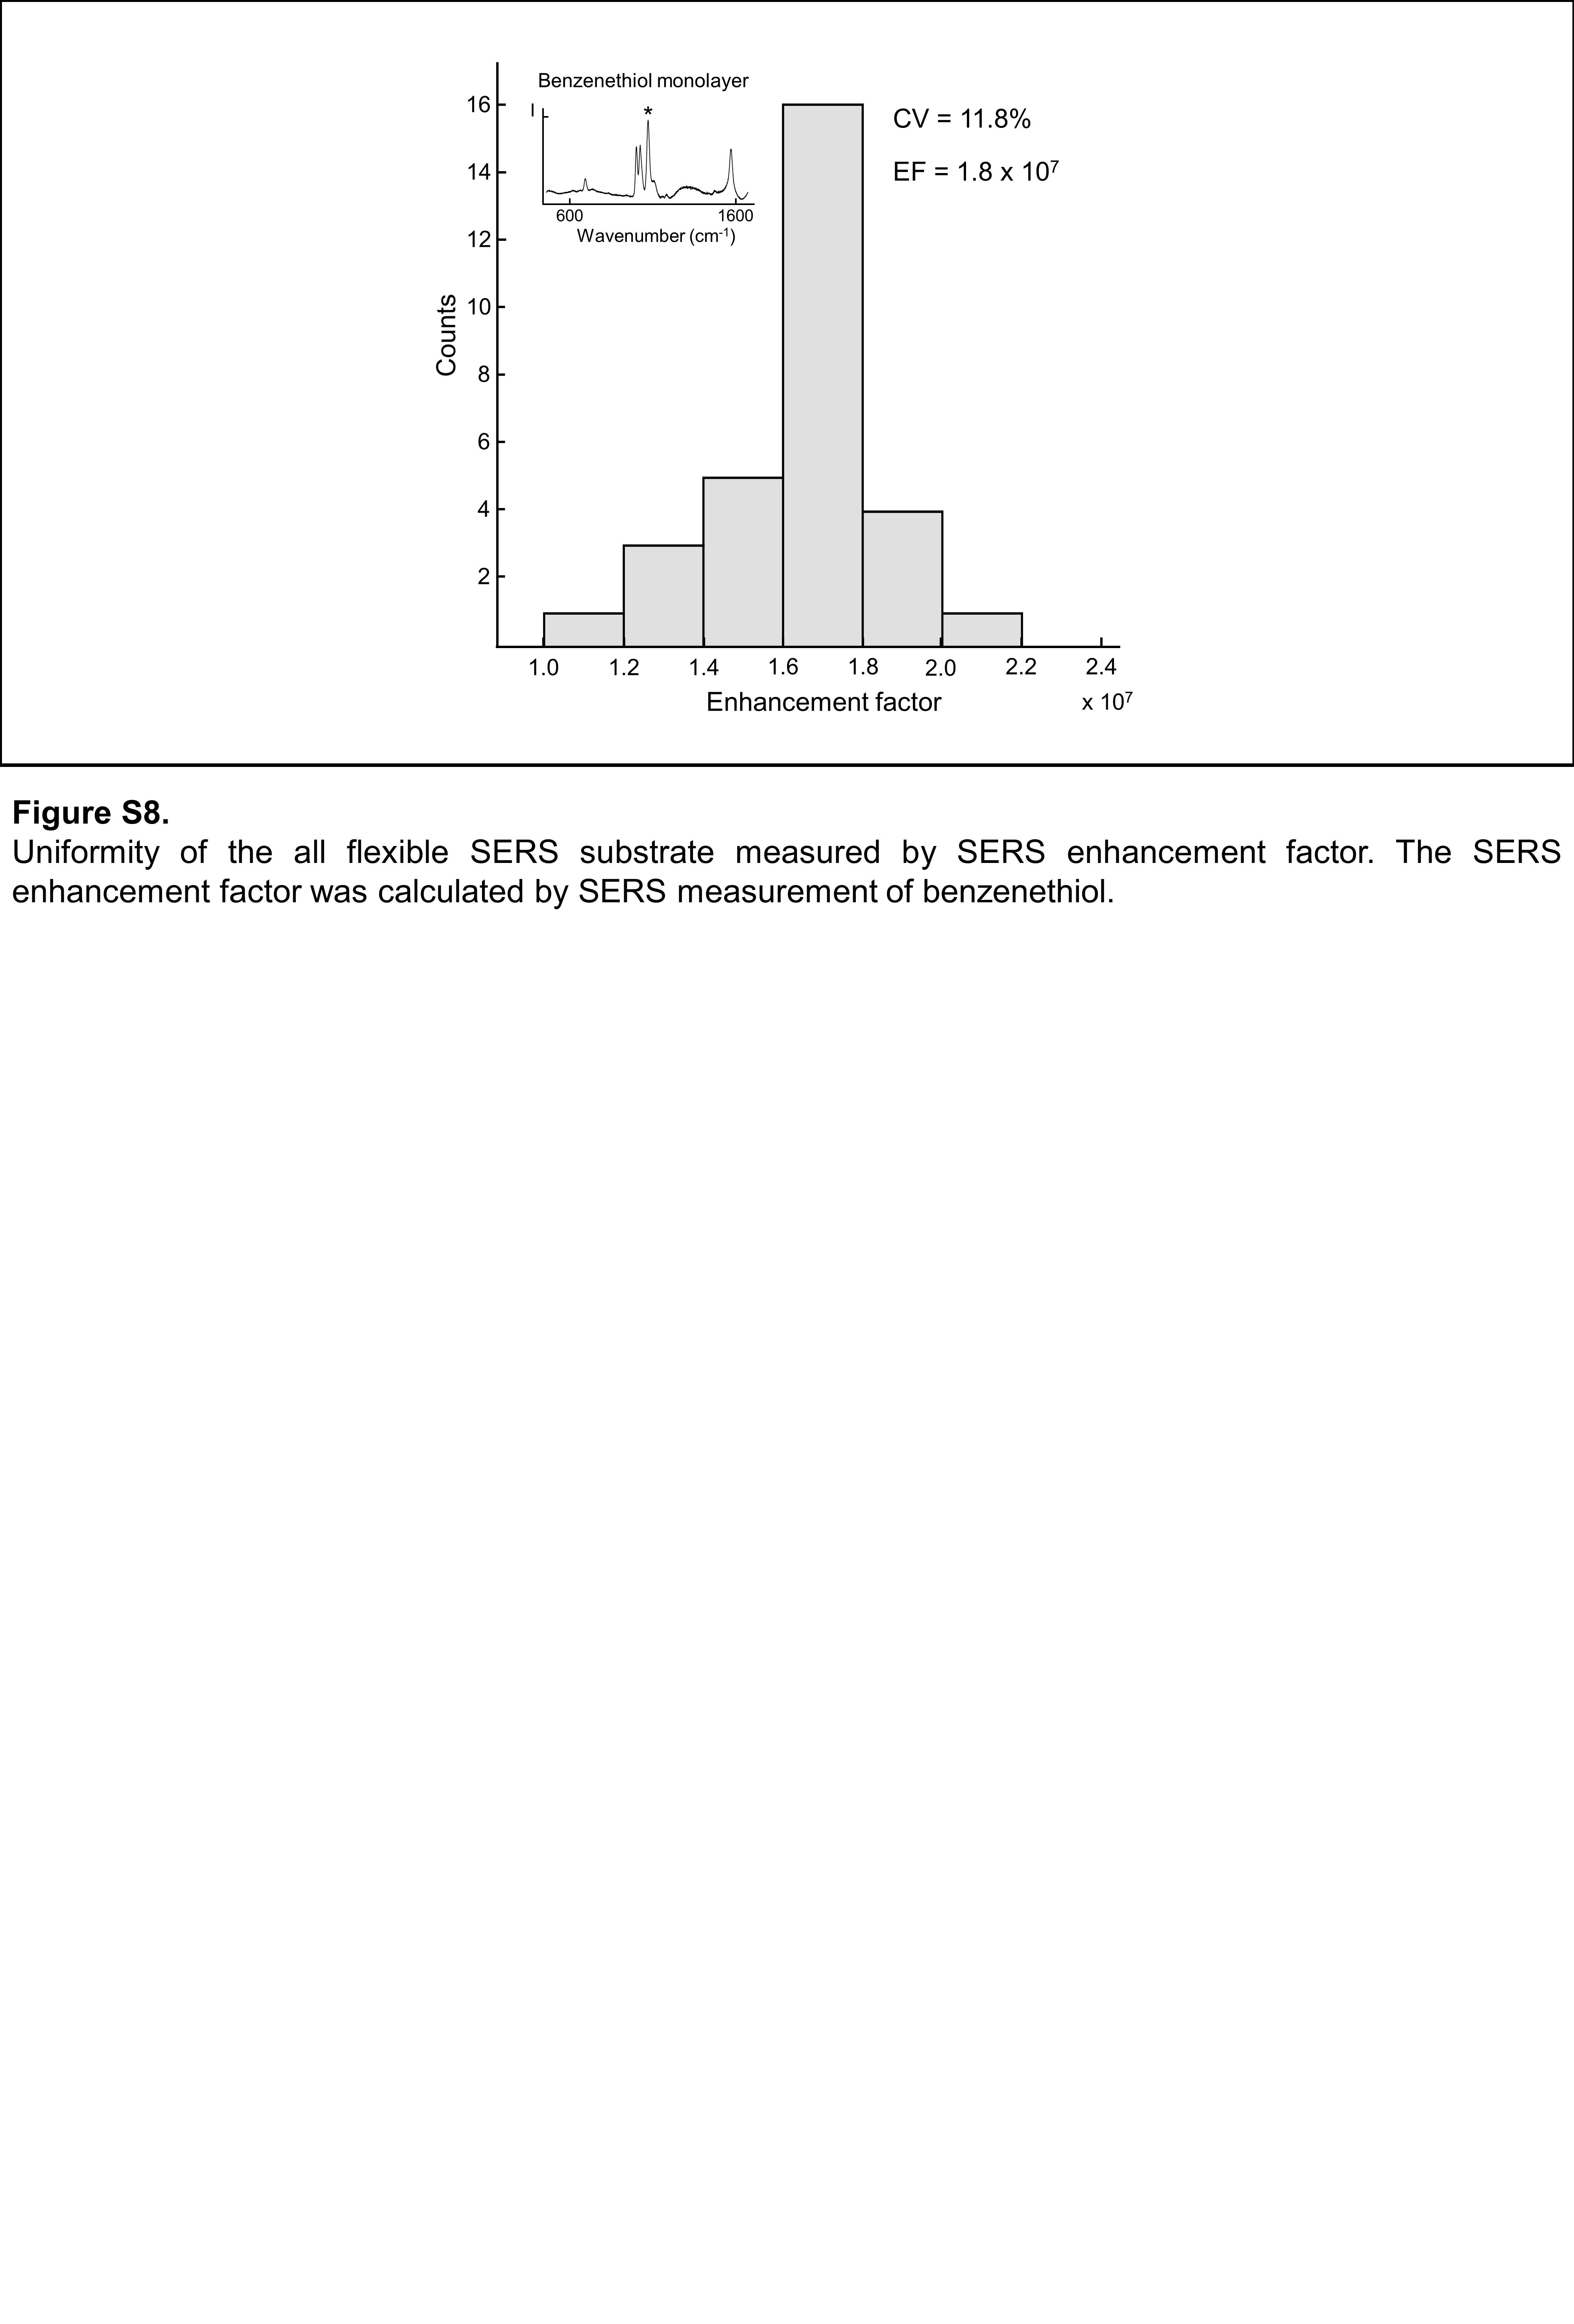


**Figure S9.** SERS enhancement factor and fabrication uniformity of the CEP-SERS patch measured from 30 different points.


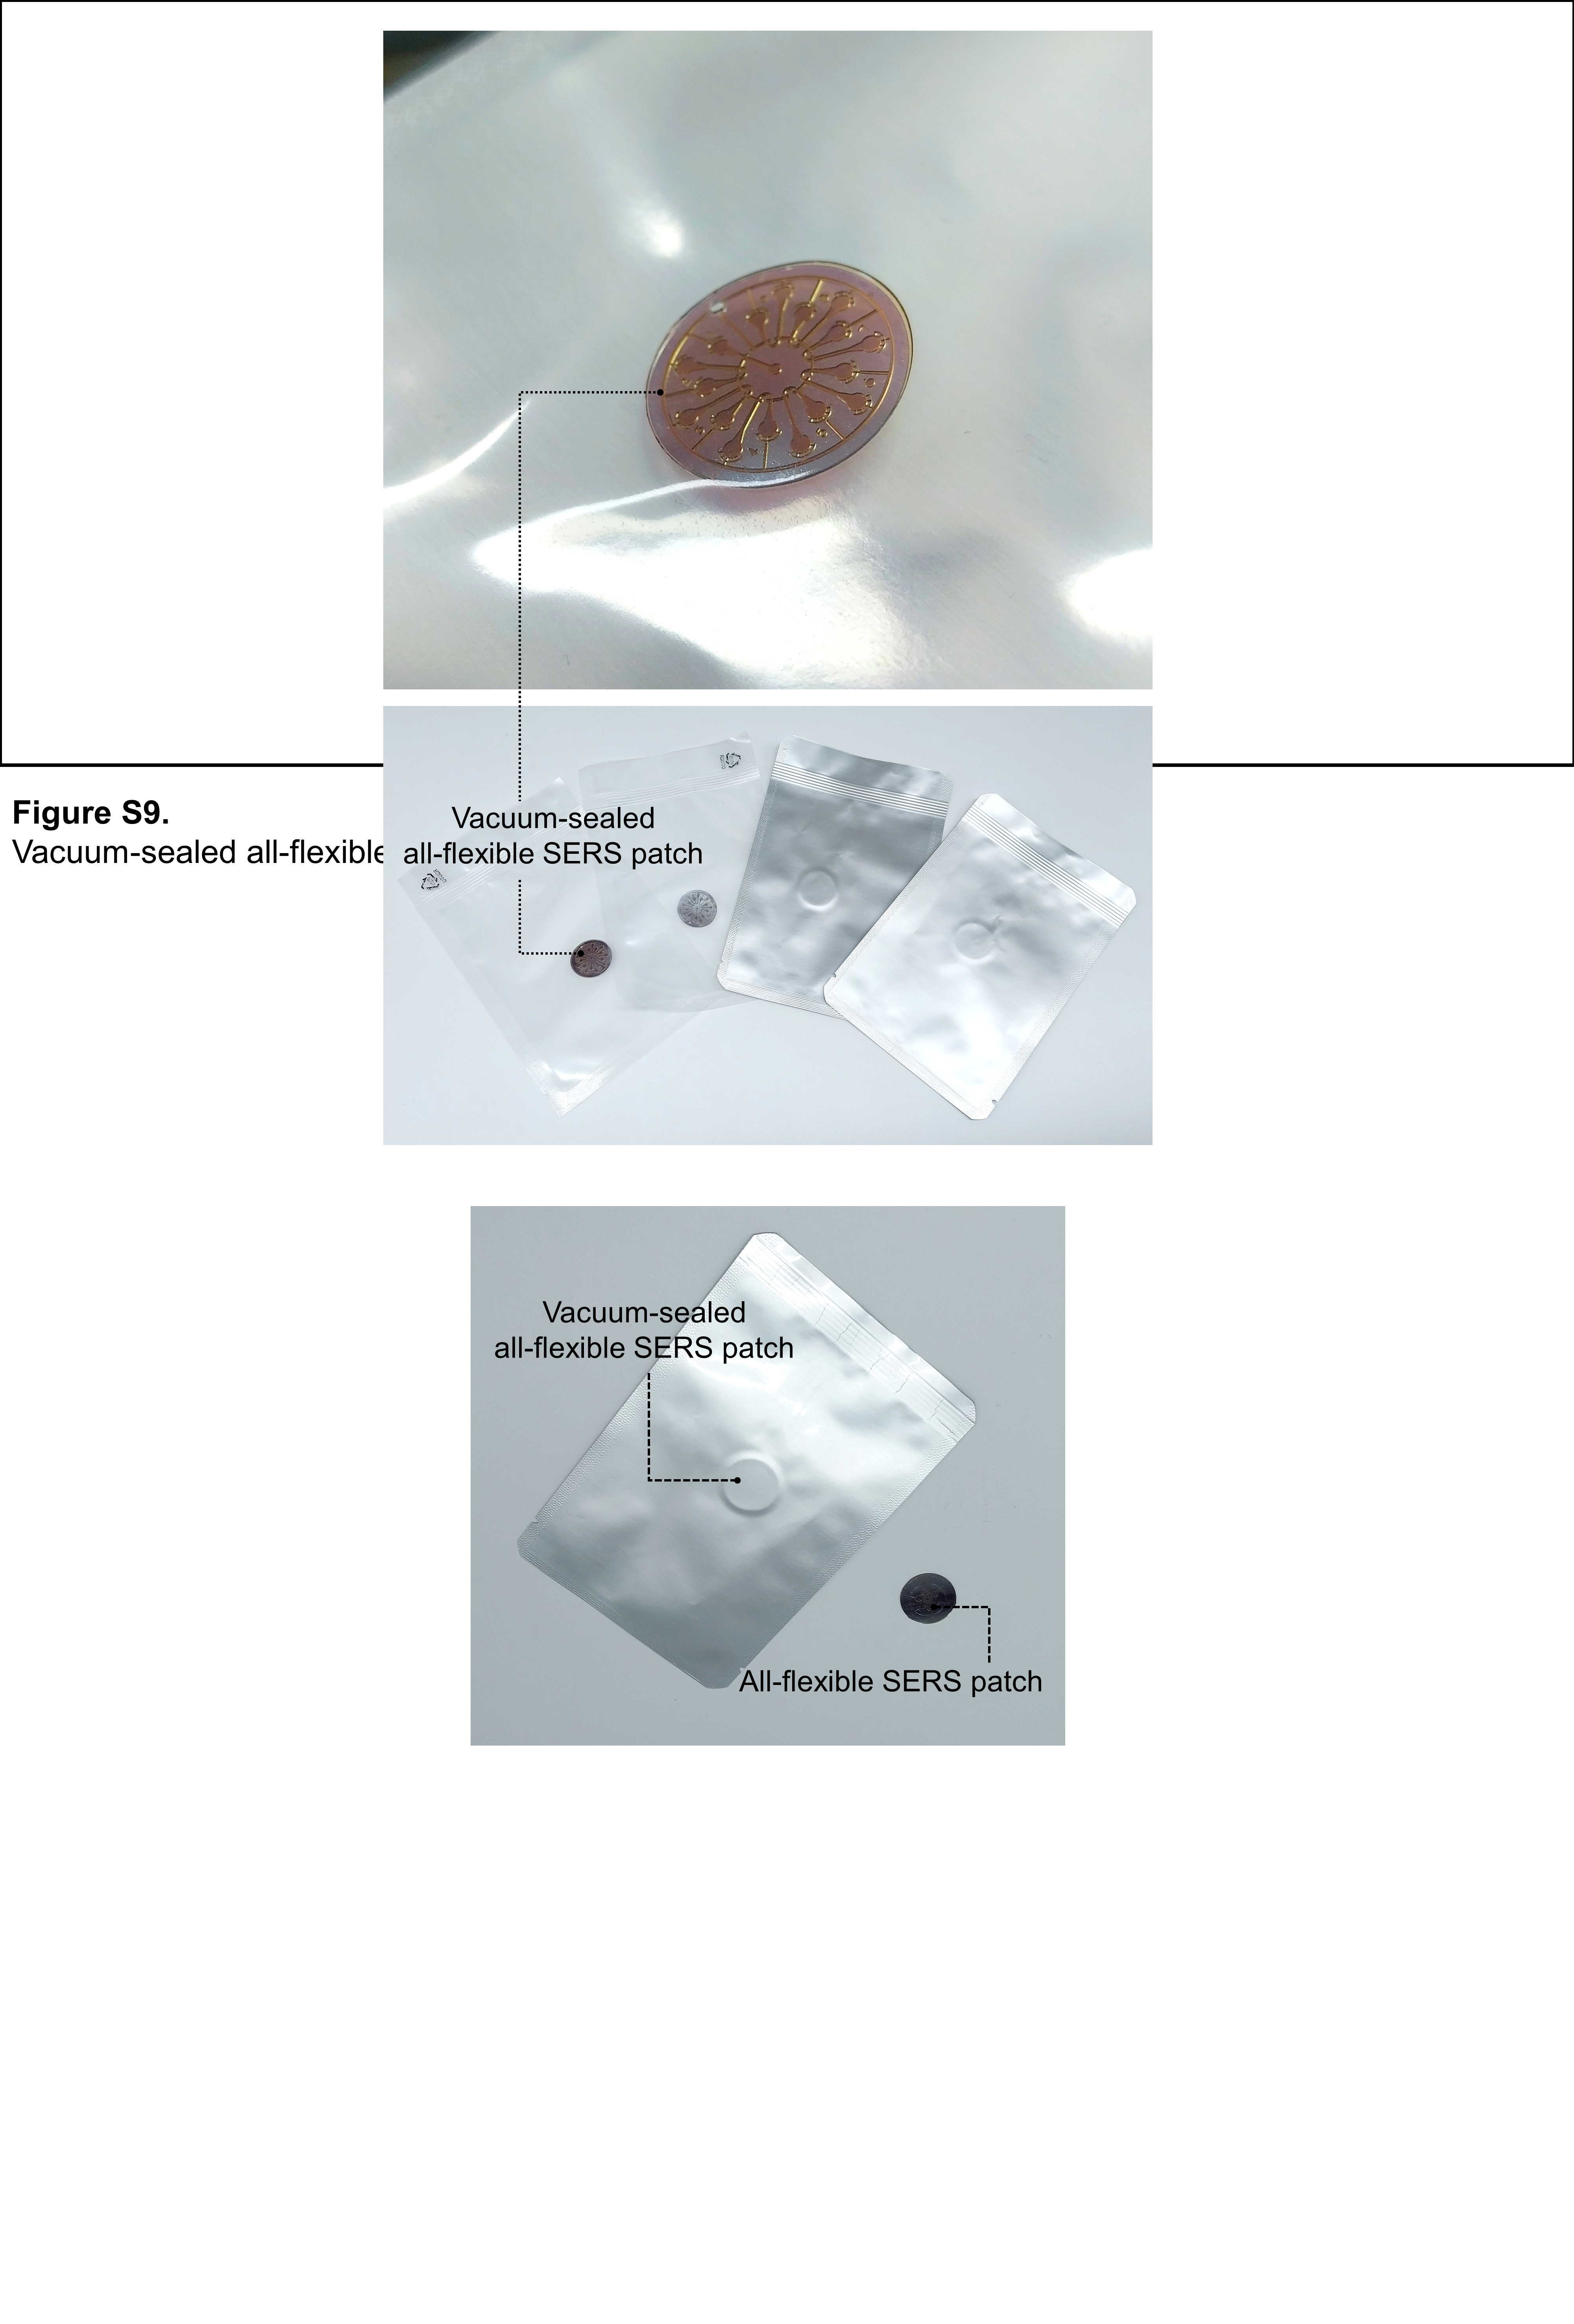


**Figure S10.** Optical images of vacuum-sealed CEP-SERS patch for on-body evaluation.


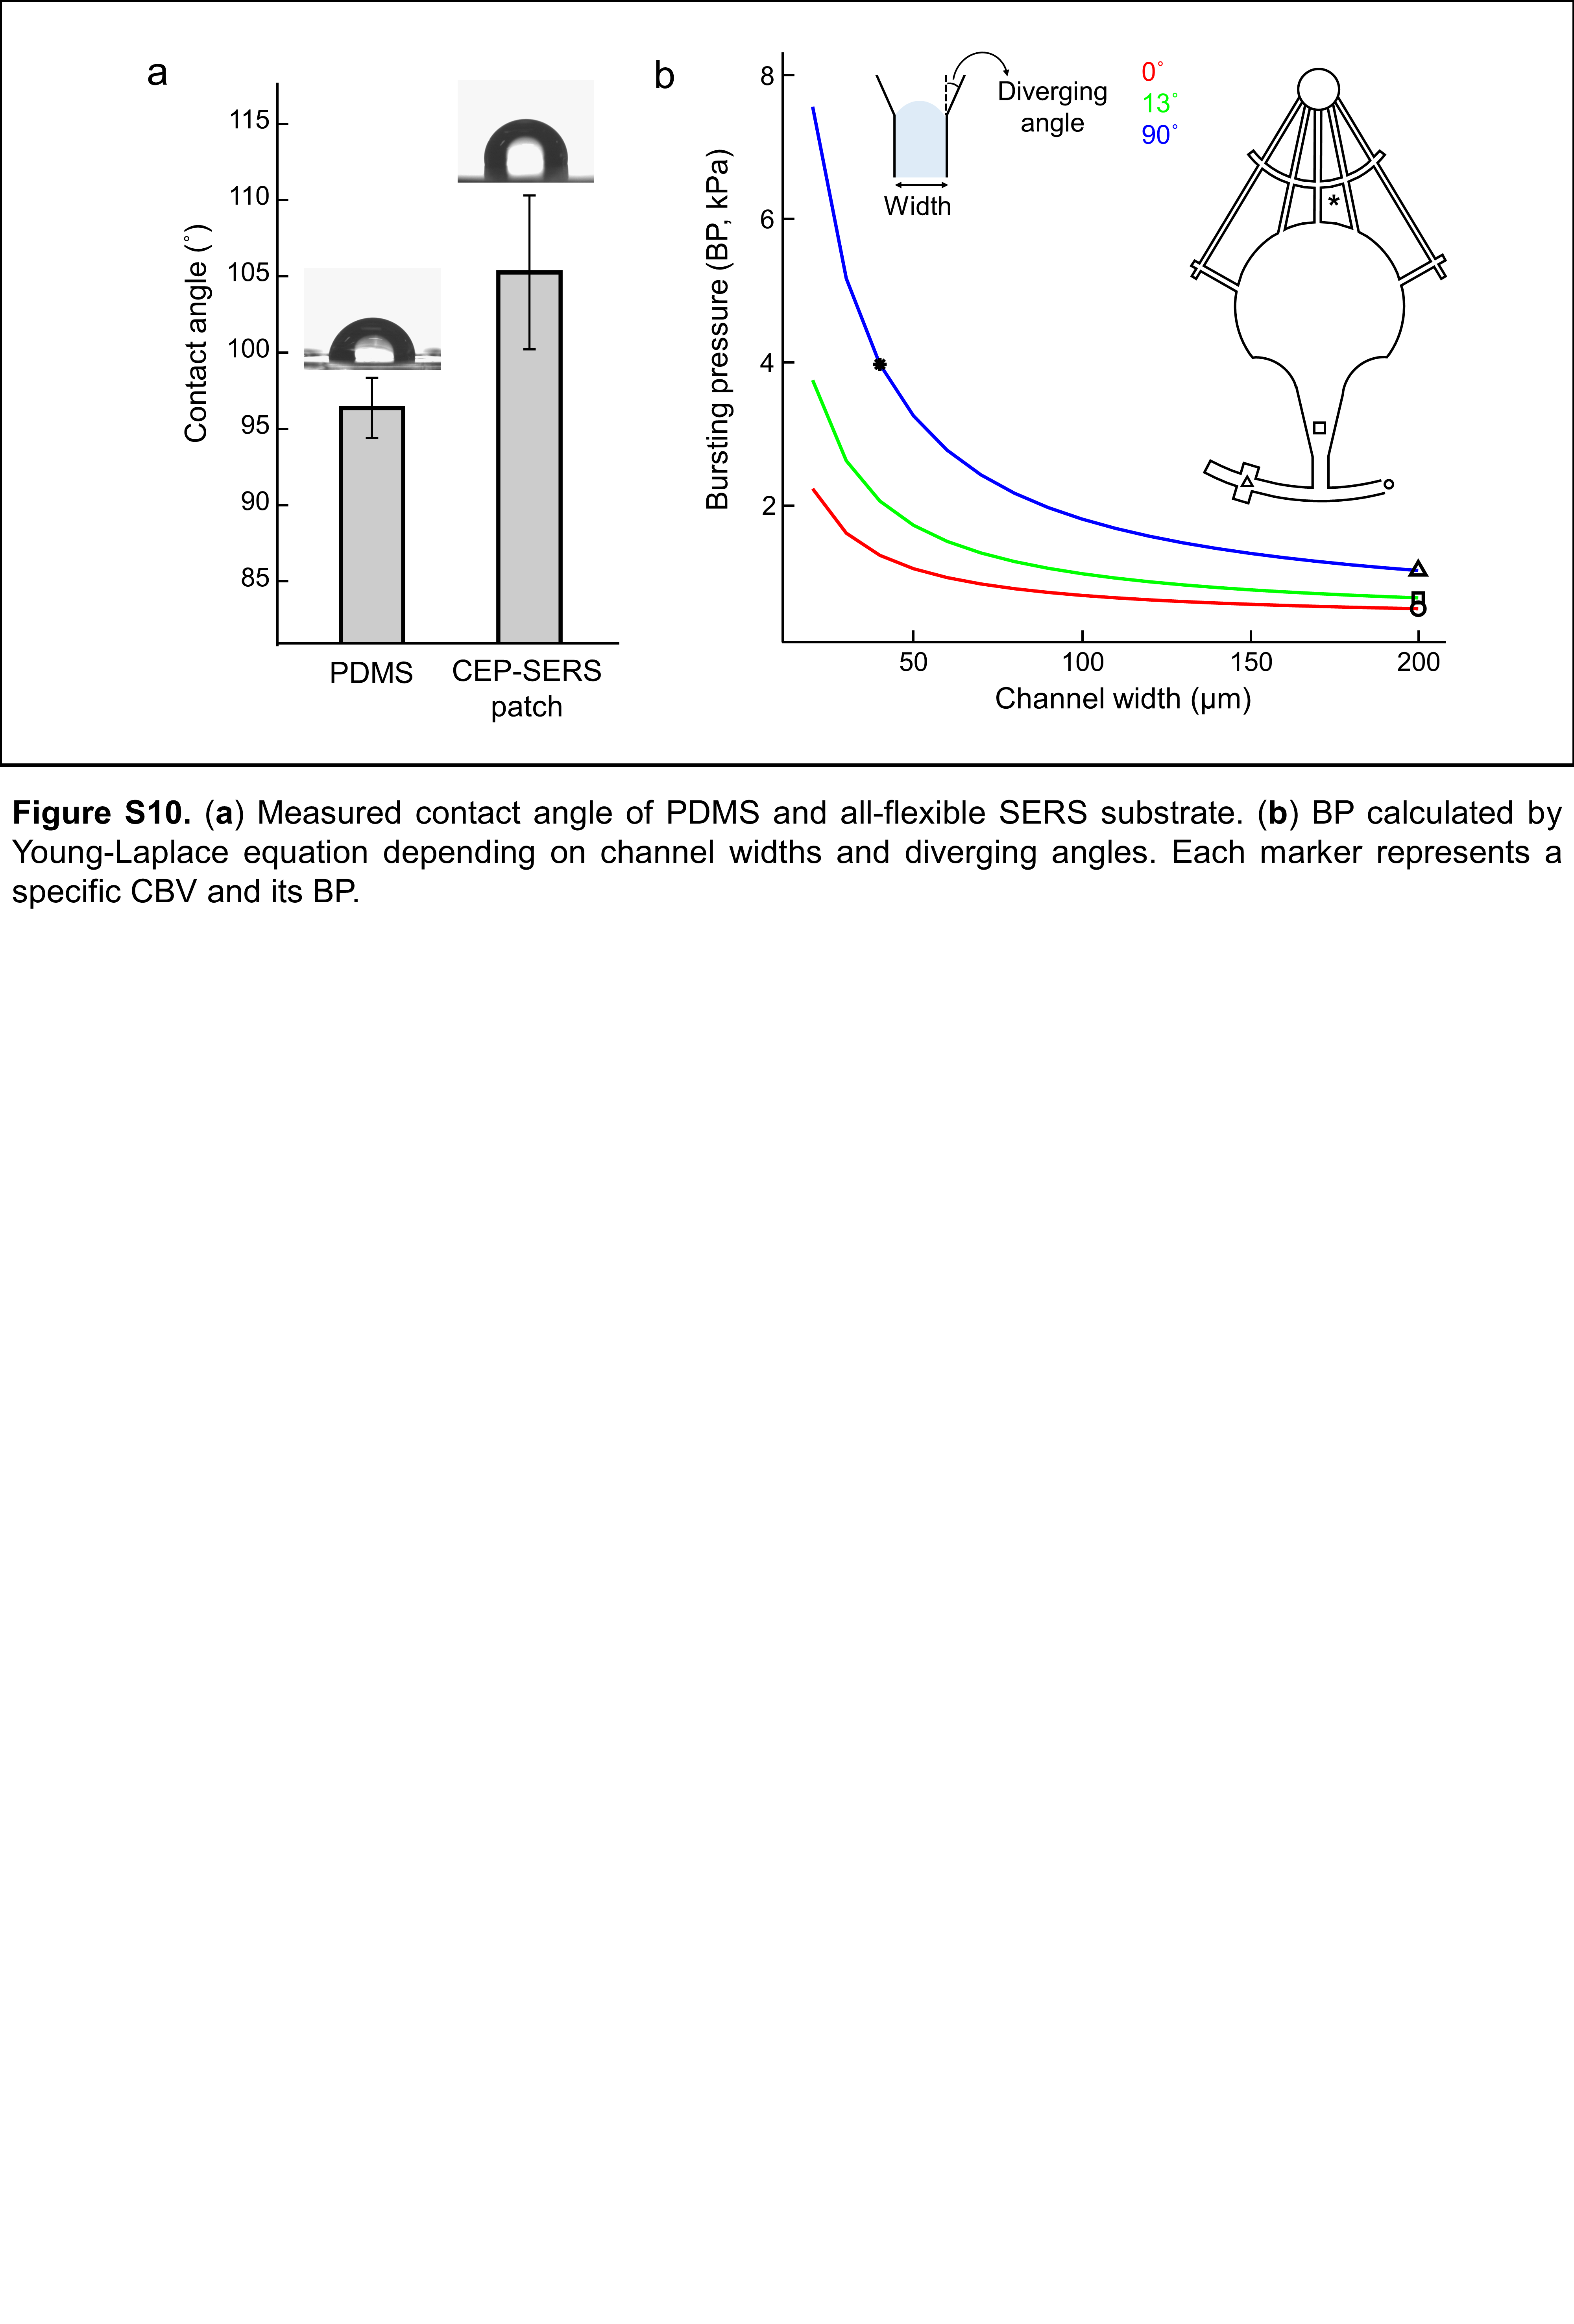


**Figure S11.** (**a**) The measured contact angle of PDMS and CEP-SERS patch. (**b**) Bursting pressure (BP) calculated by the Young-Laplace equation depending on channel widths and diverging angles. Each marker represents a specific CBV and its BP. The error bars represent one standard deviation from the mean.


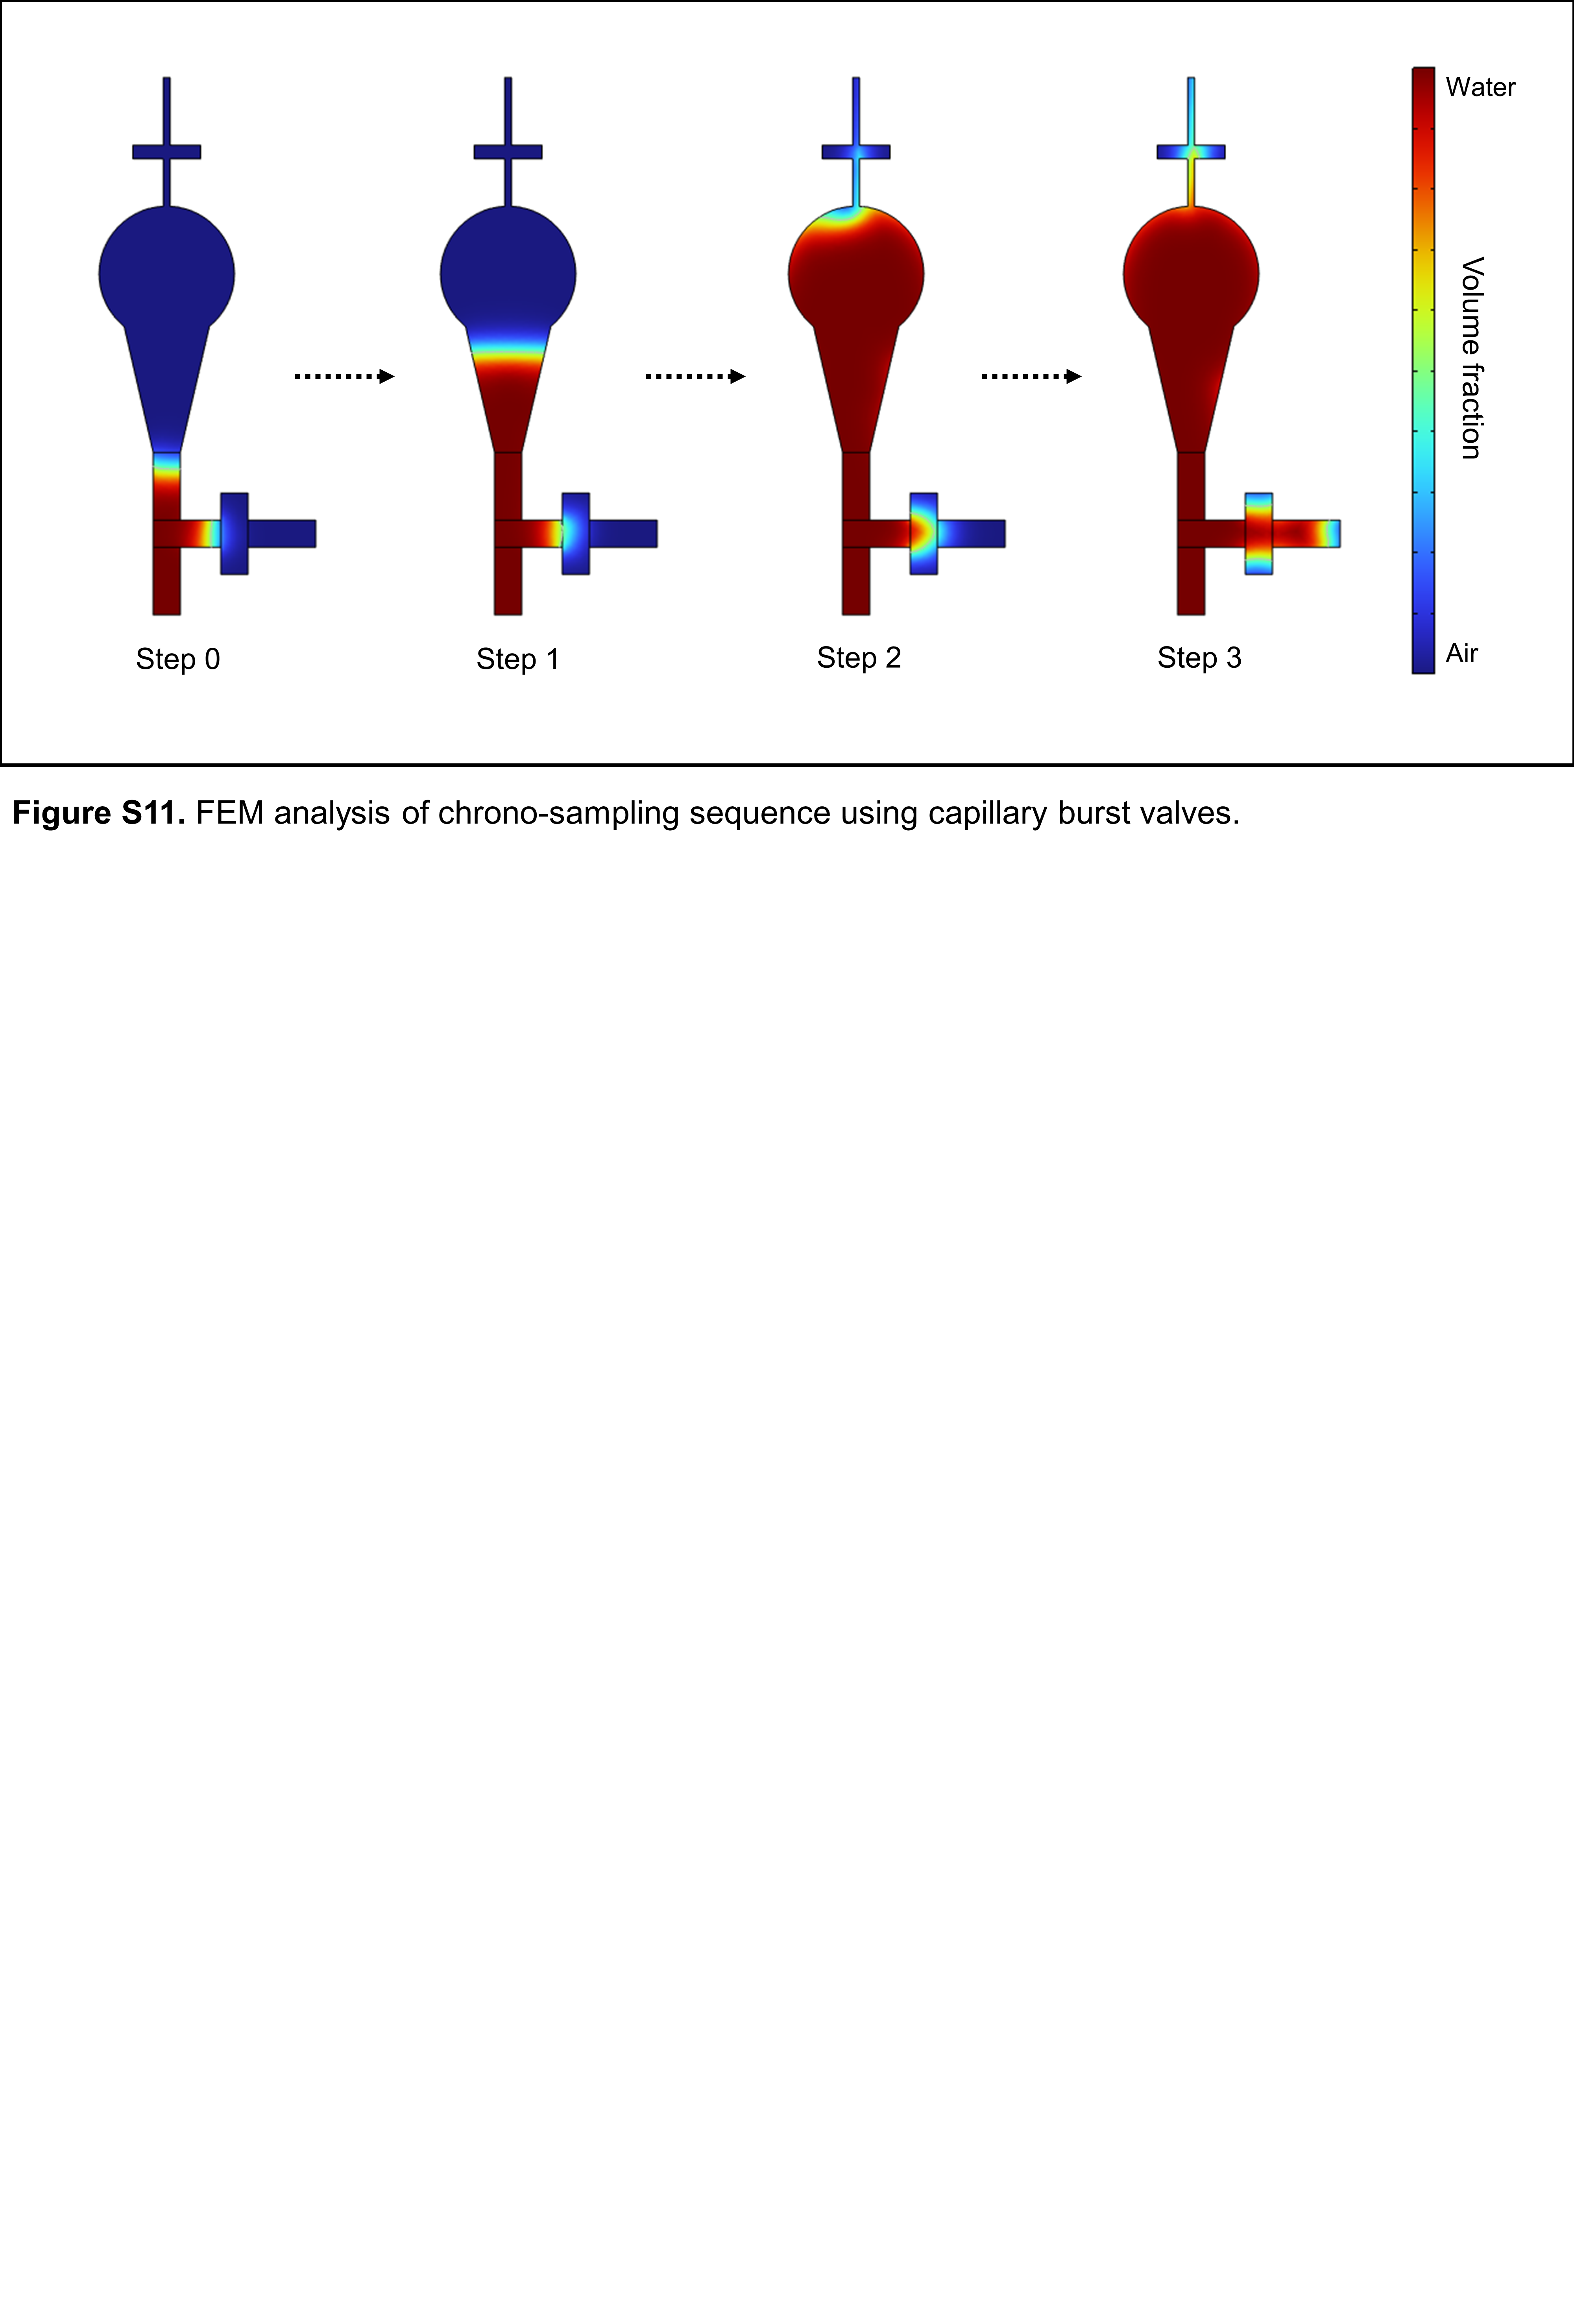


**Figure S12.** Two-phase fluid dynamic analysis of chrono-sampling through capillary bursting valves.


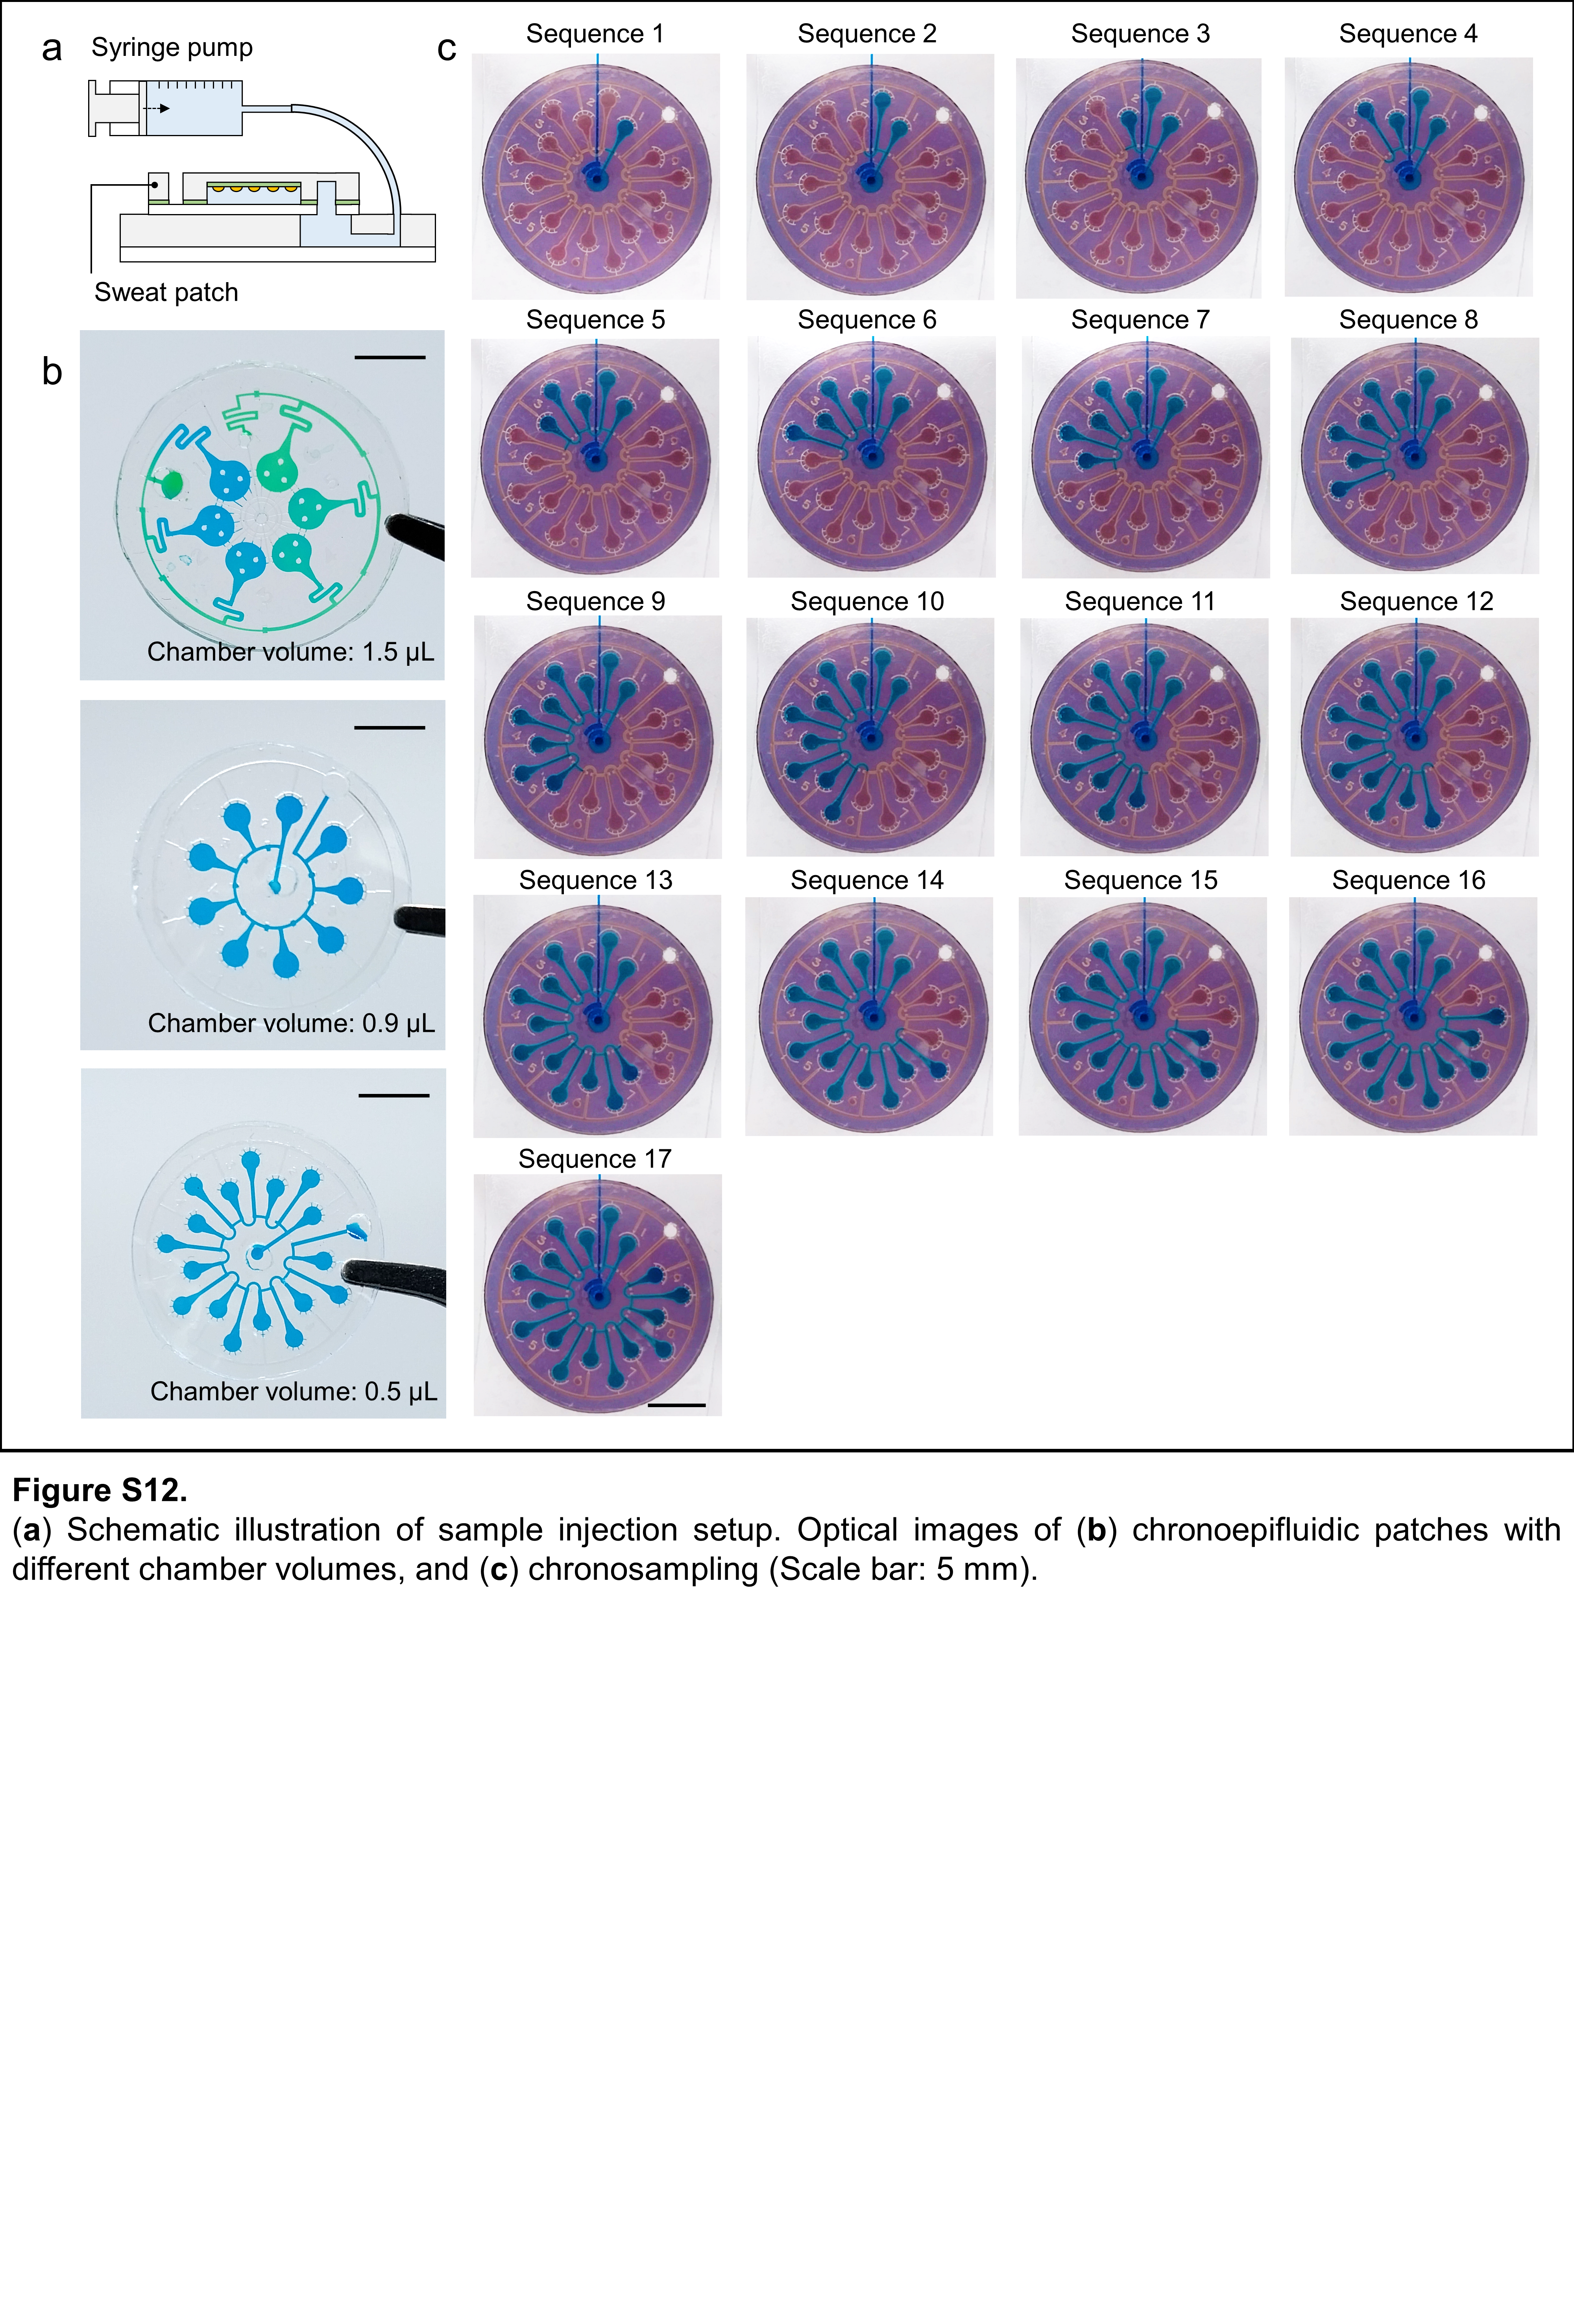


**Figure S13.** (**a**) Schematic illustration of sequential sample injection setup. Optical images of (**b**) microfluidic sequential sampler with different chamber volumes and (**c**) sequential sampling using the CEP-SERS patch with 0.5 μL chamber volume (Scale bar: 5 mm).


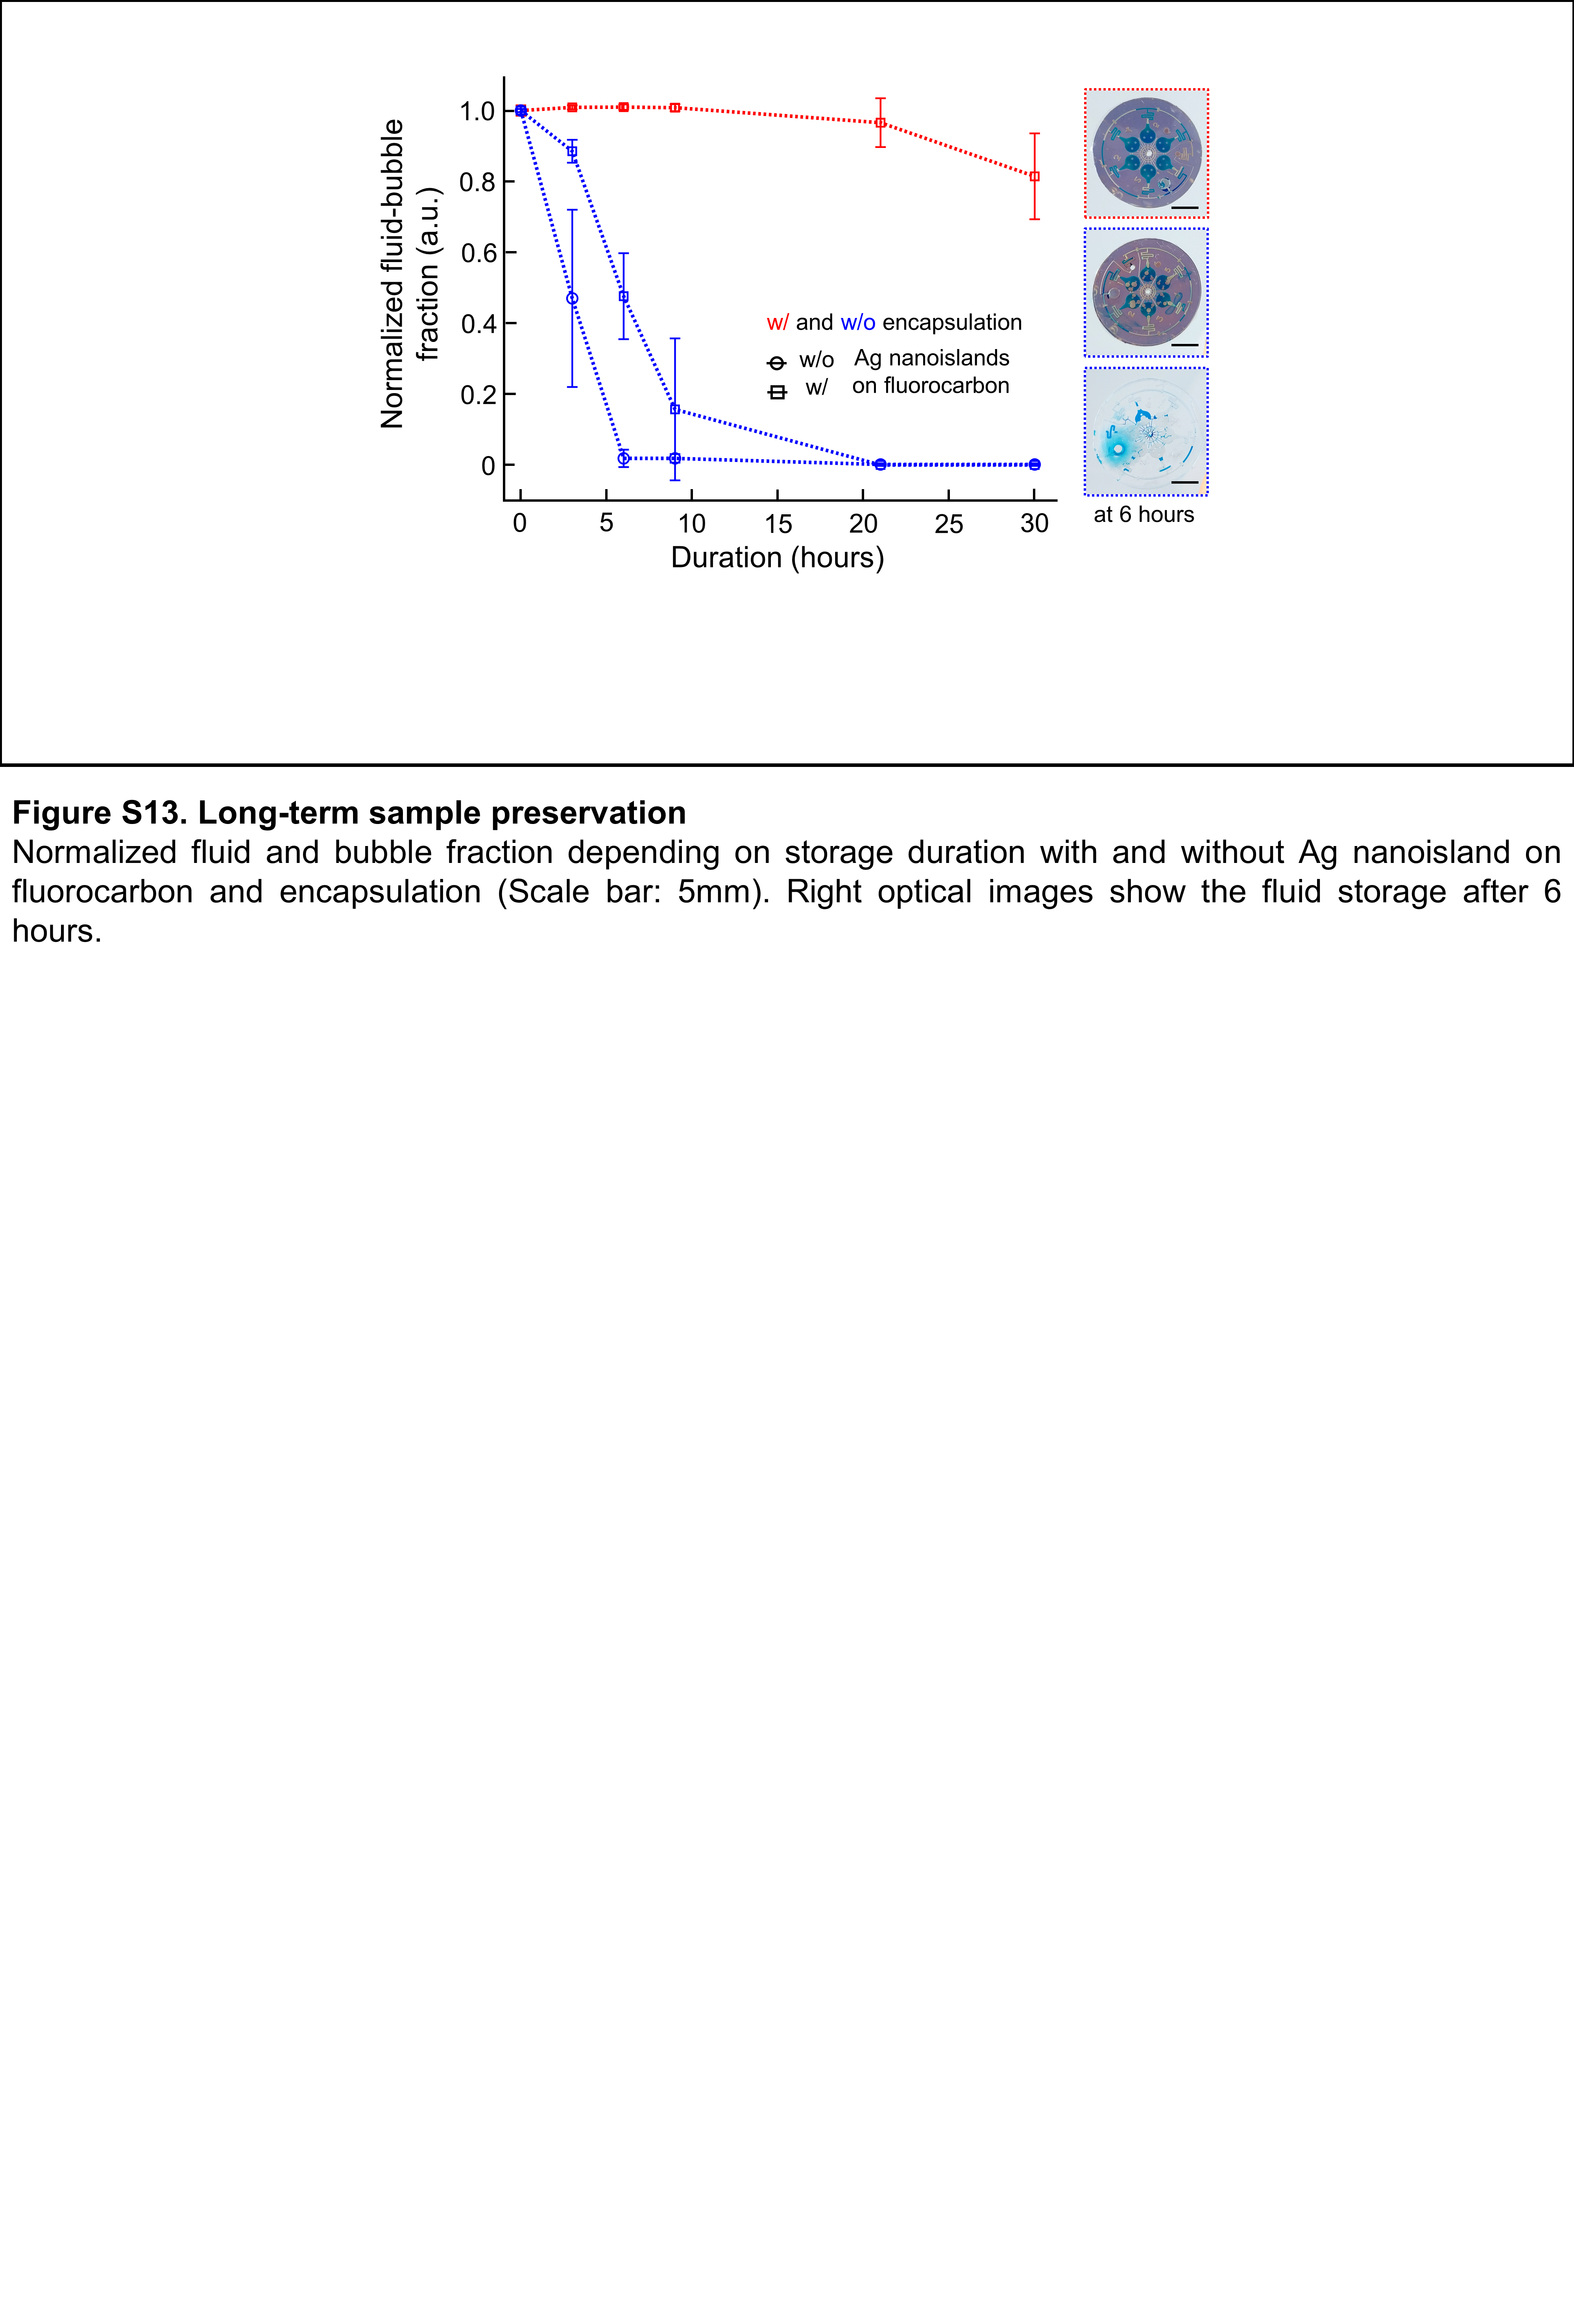


**Figure S14.** Normalized fluid and bubble fraction depending on storage duration with and without Ag nanoisland on fluorocarbon and encapsulation (Scale bar: 5mm). Right optical images show the sample storage after 6 hours. The error bars represent one standard deviation from the mean.


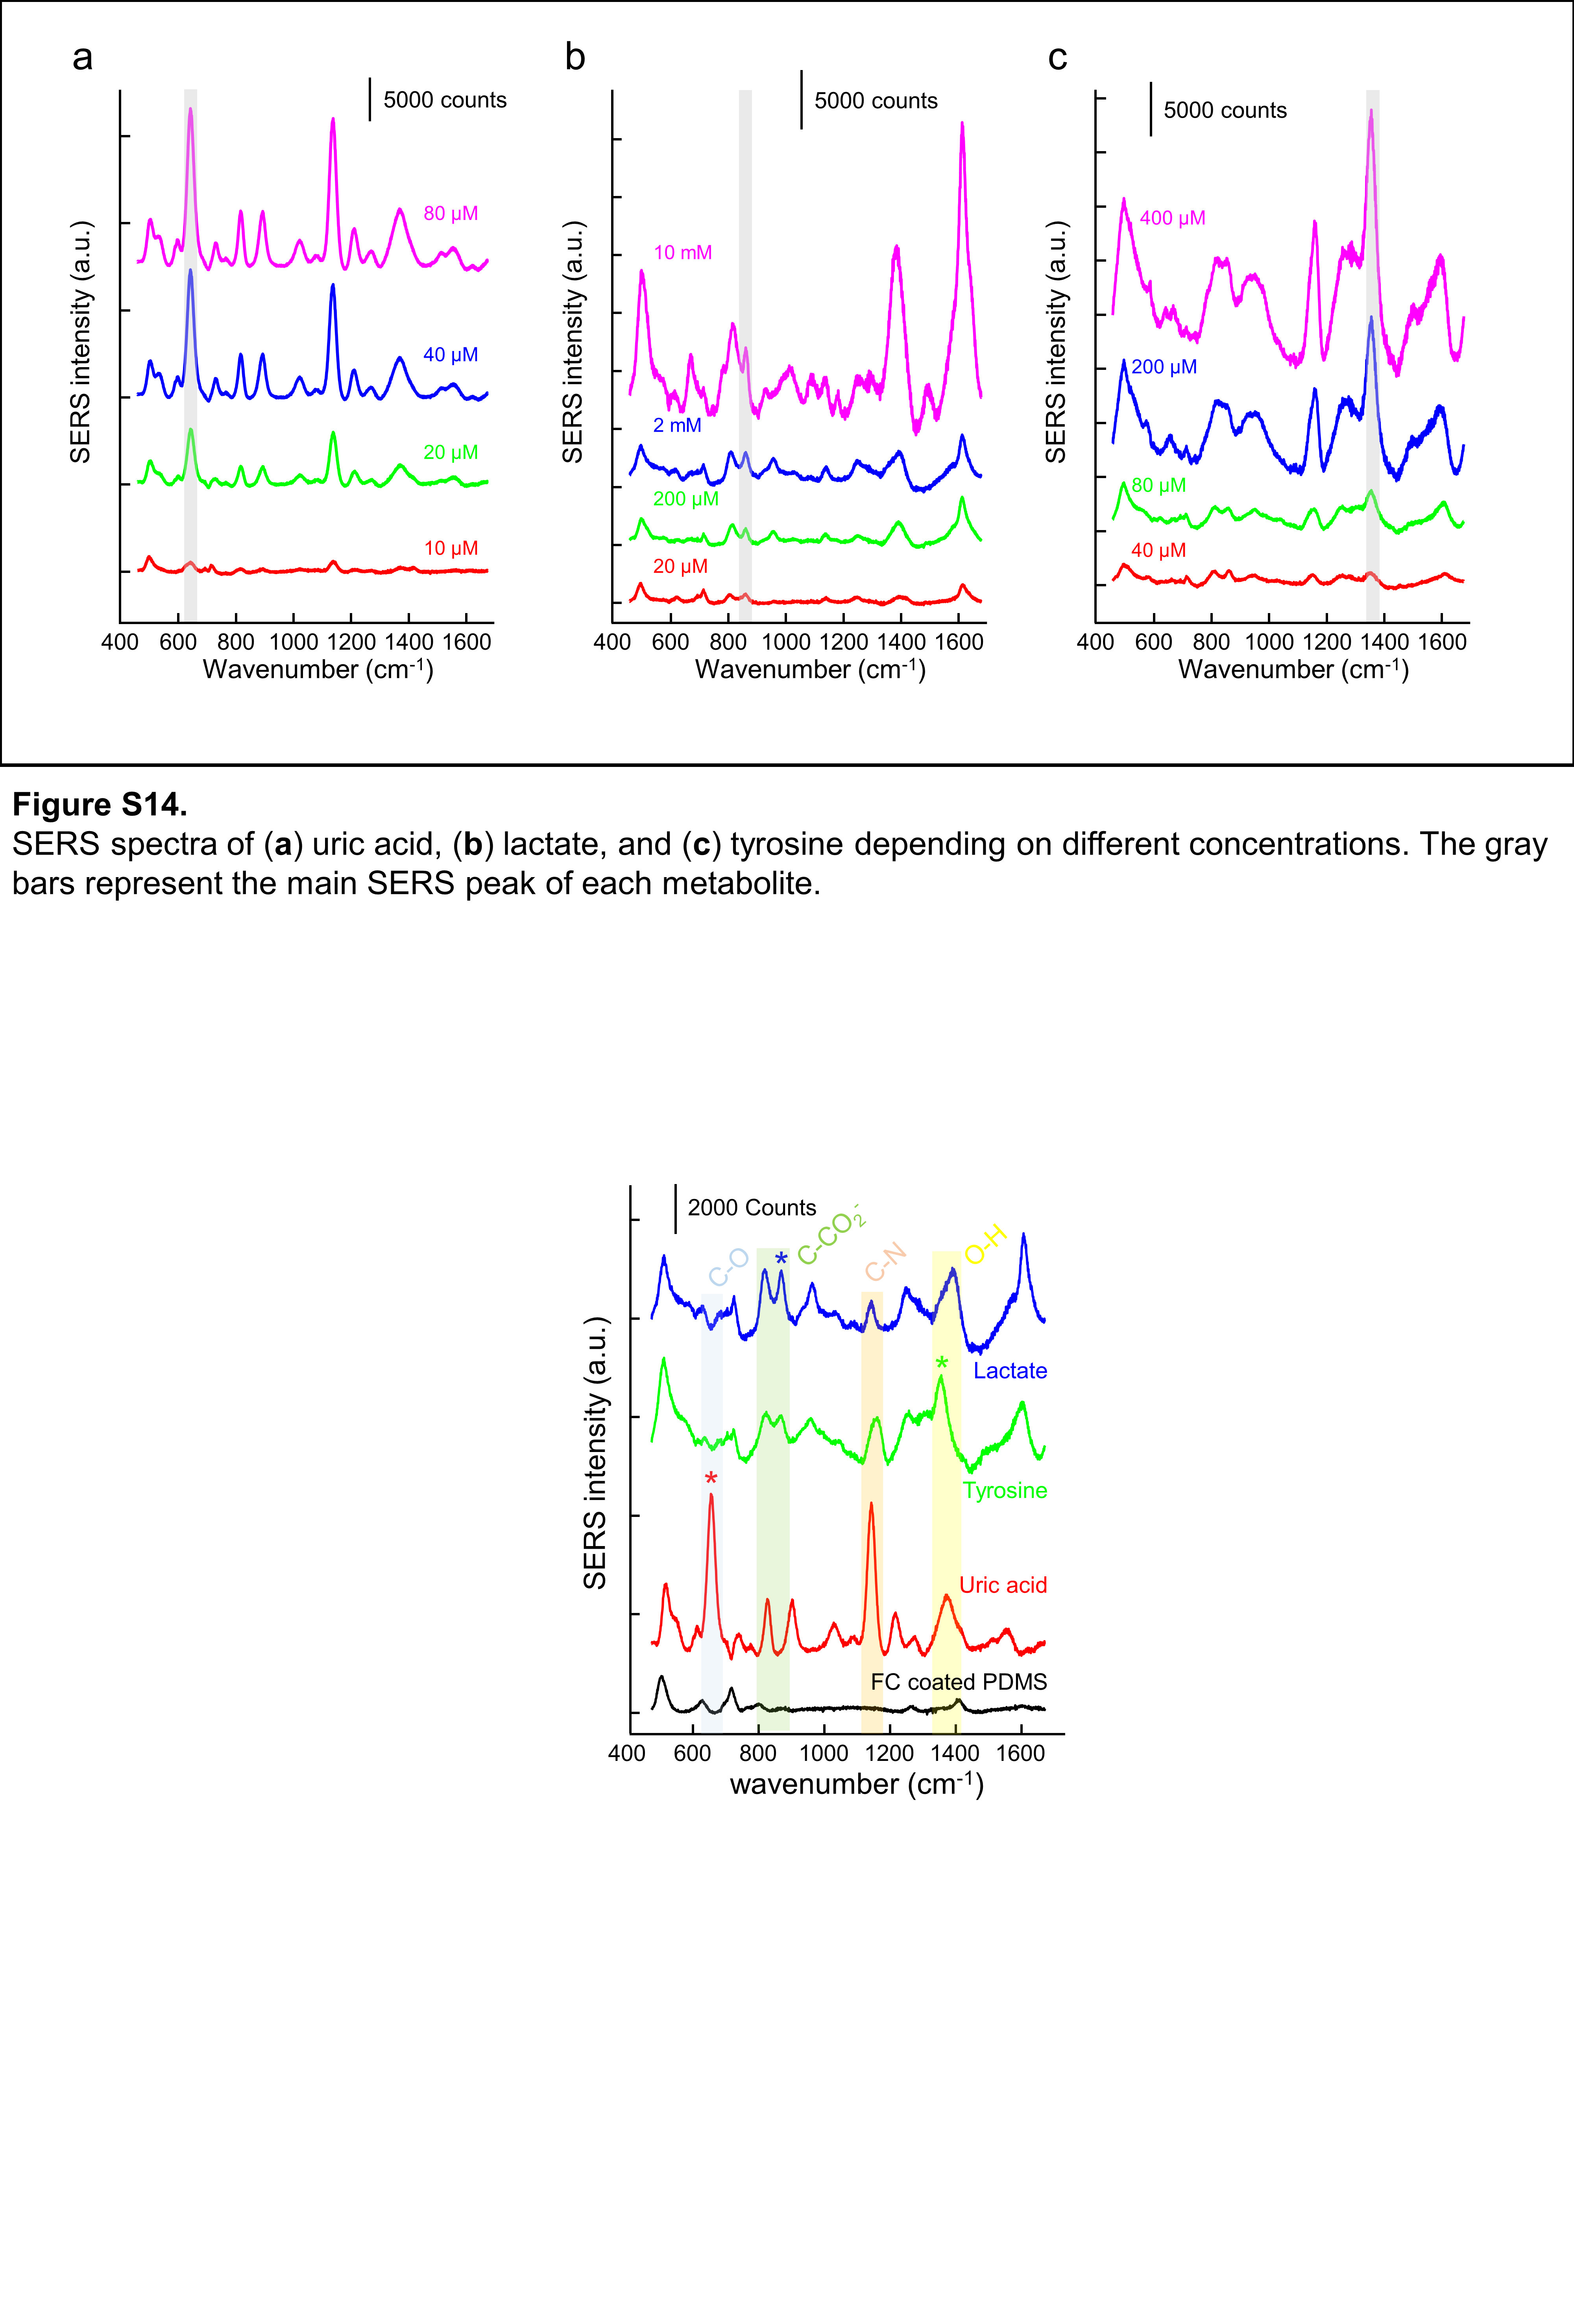


**Figure S15.** SERS spectra of (**a**) uric acid, (**b**) lactate, and (**c**) tyrosine depending on different concentrations. The gray bars represent the main SERS peak of each metabolite.


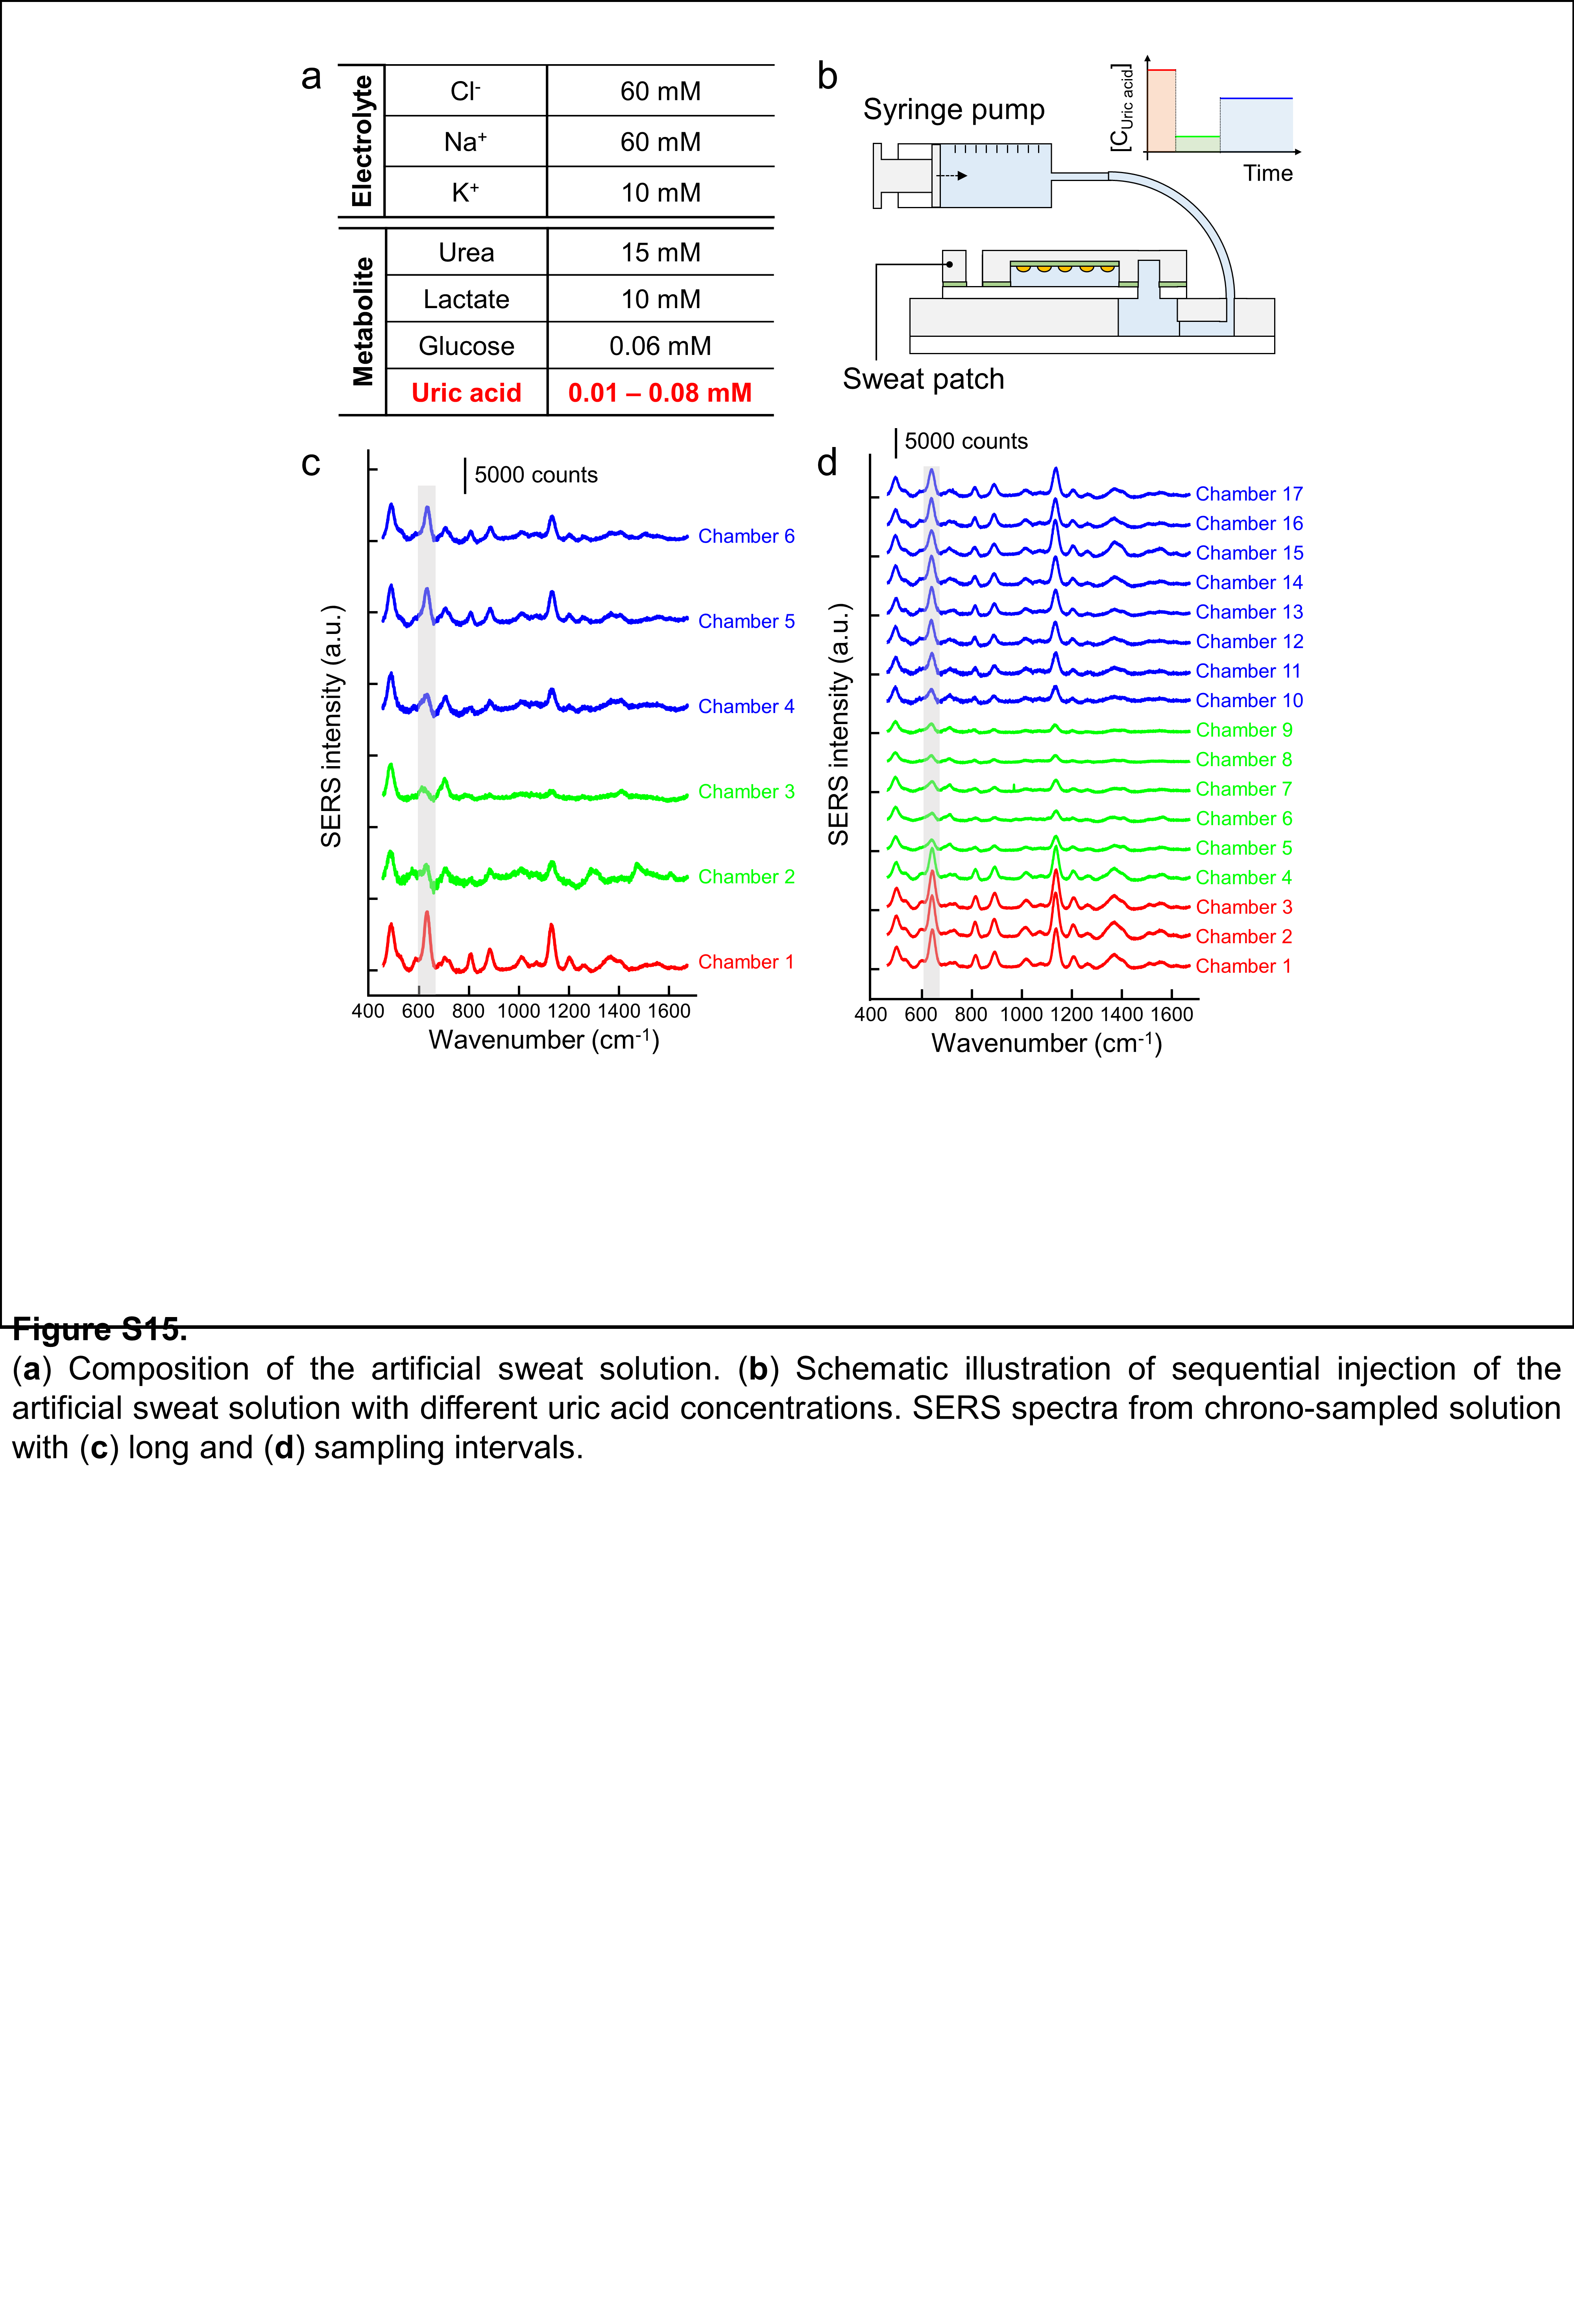


**Figure S16.** (**a**) Composition of the artificial sweat solution. (**b**) Schematic illustration for sequential injection of the artificial sweat solution with different uric acid concentrations. SERS spectra from chrono-sampled solution with (**c**) sparse and (**d**) dense sampling intervals.


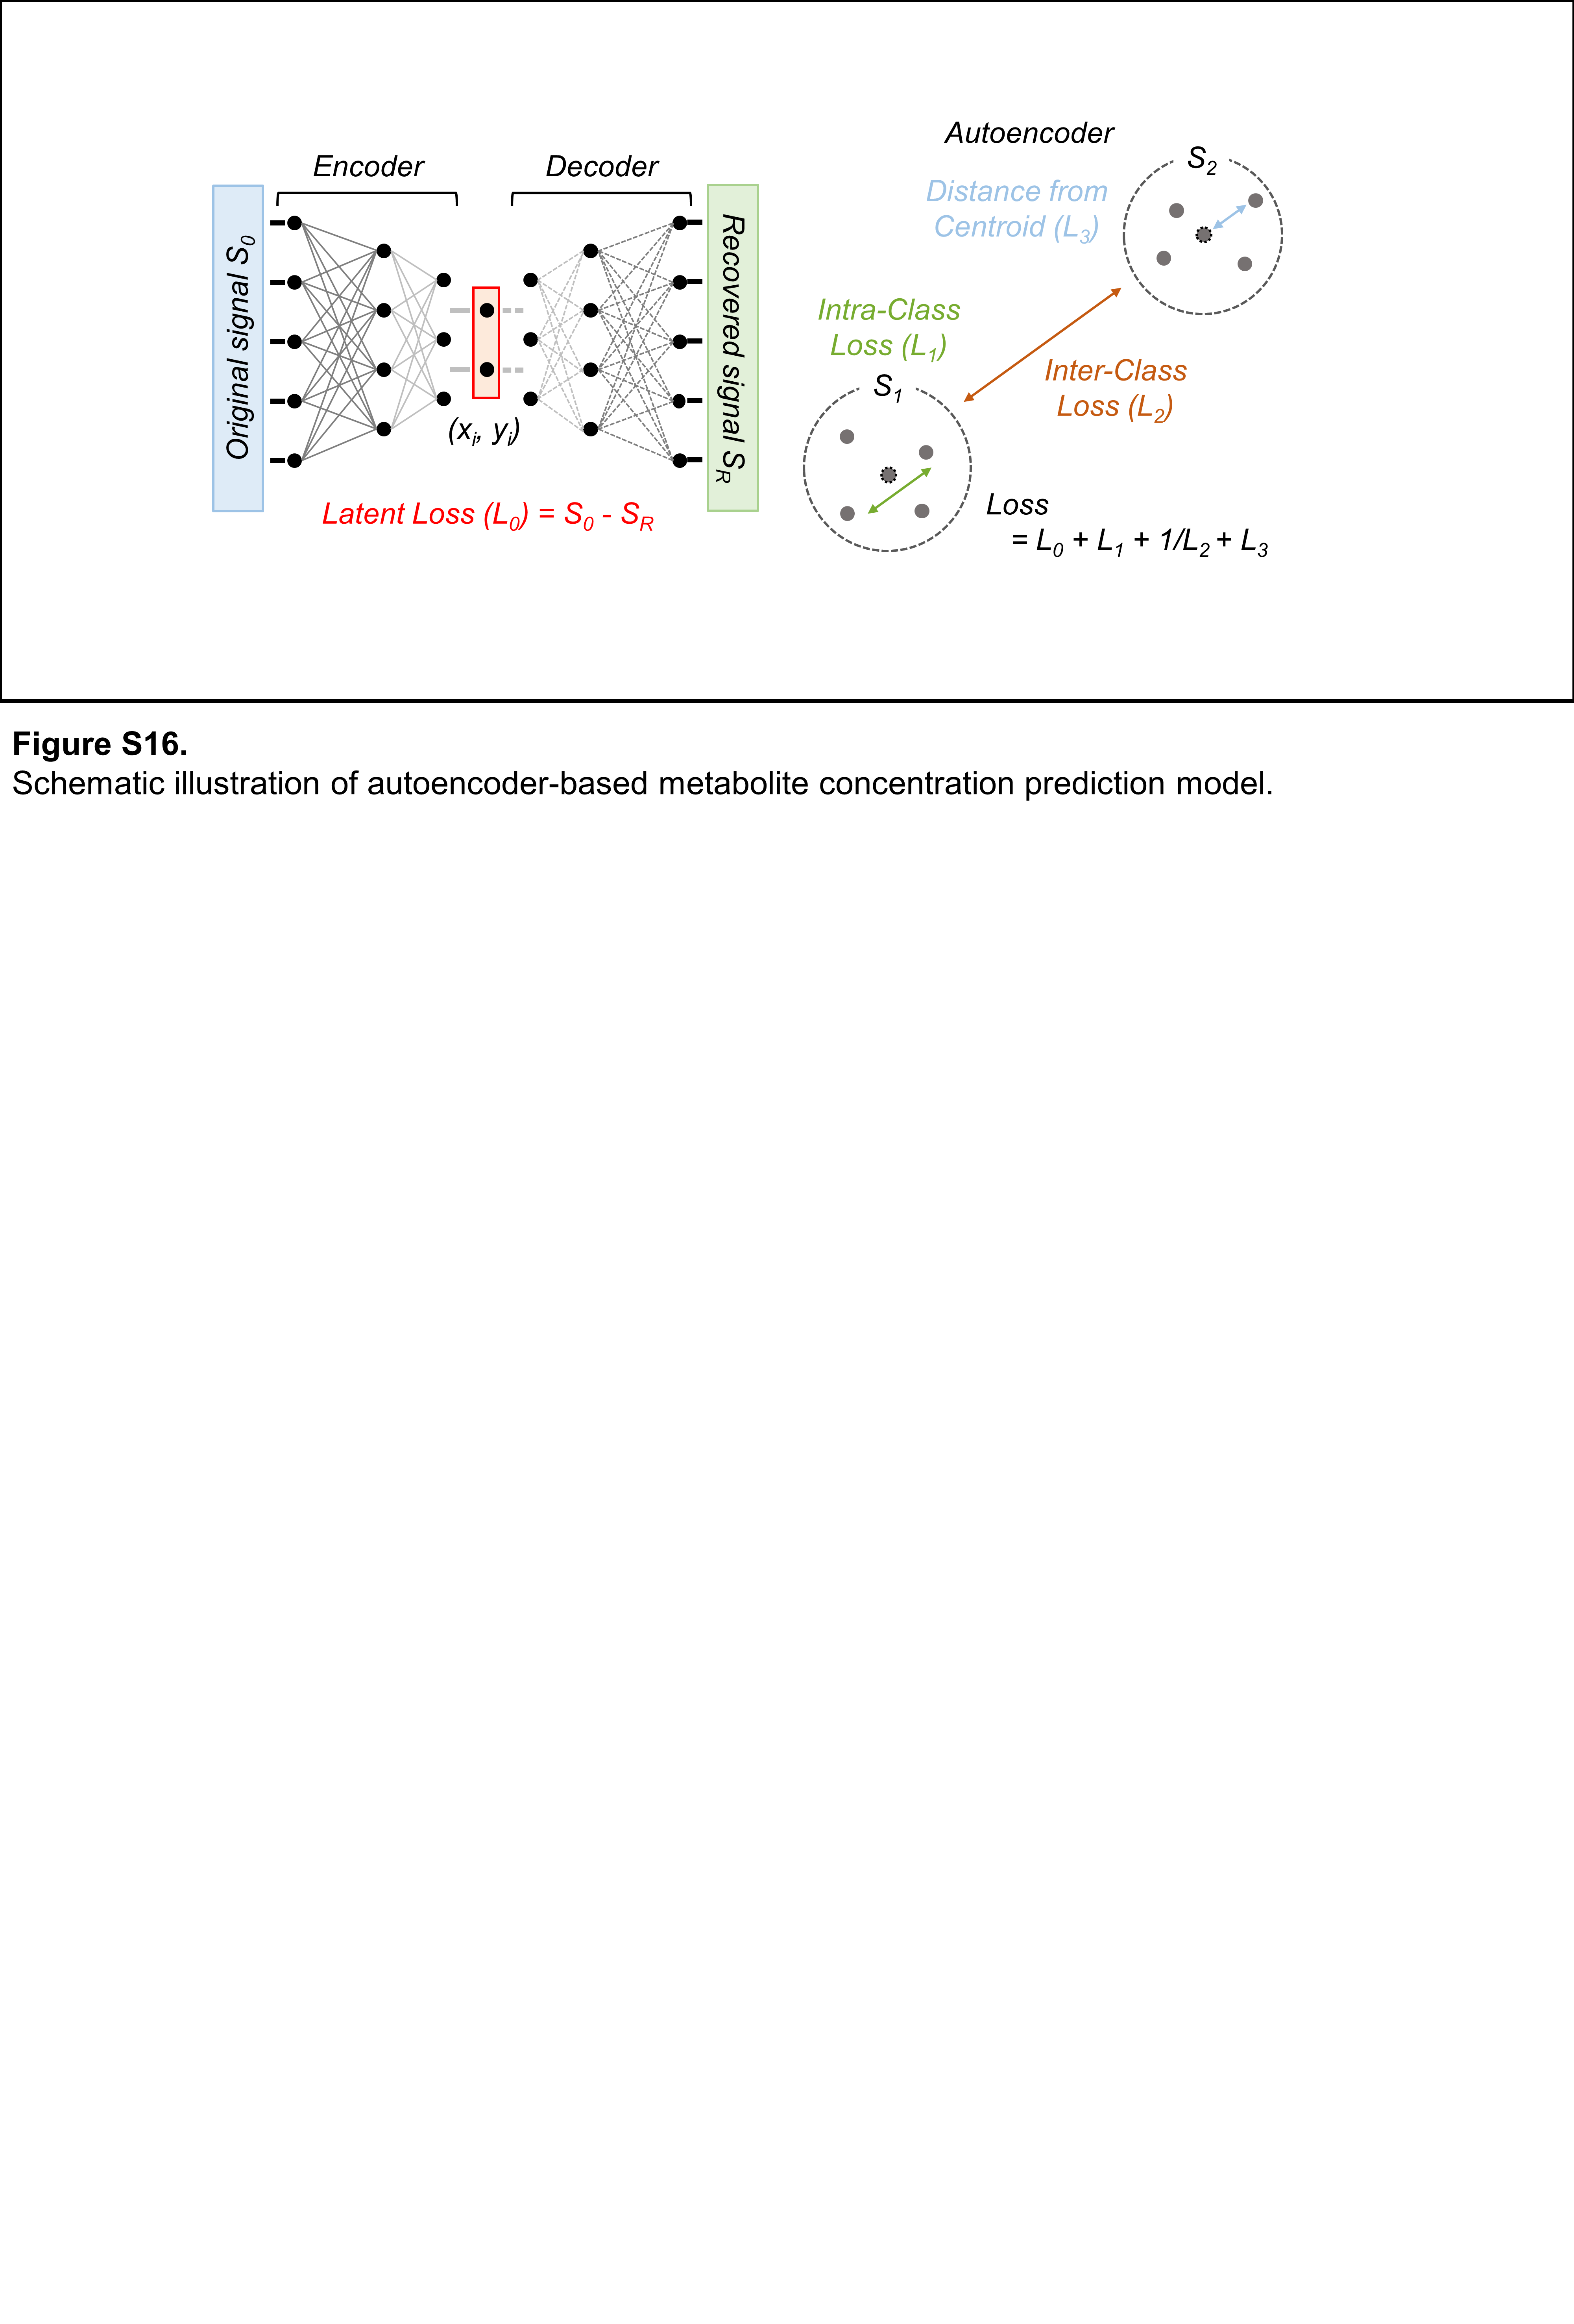


**Figure S17.** Schematic illustration of machine-learned metabolic quantification using an autoencoder with a logistic regression model. The autoencoder-based prediction model is trained to minimize the total loss function, including latent loss(L0), intra-class loss(L1), distance from the centroid (L2), and inter-class loss(L3).


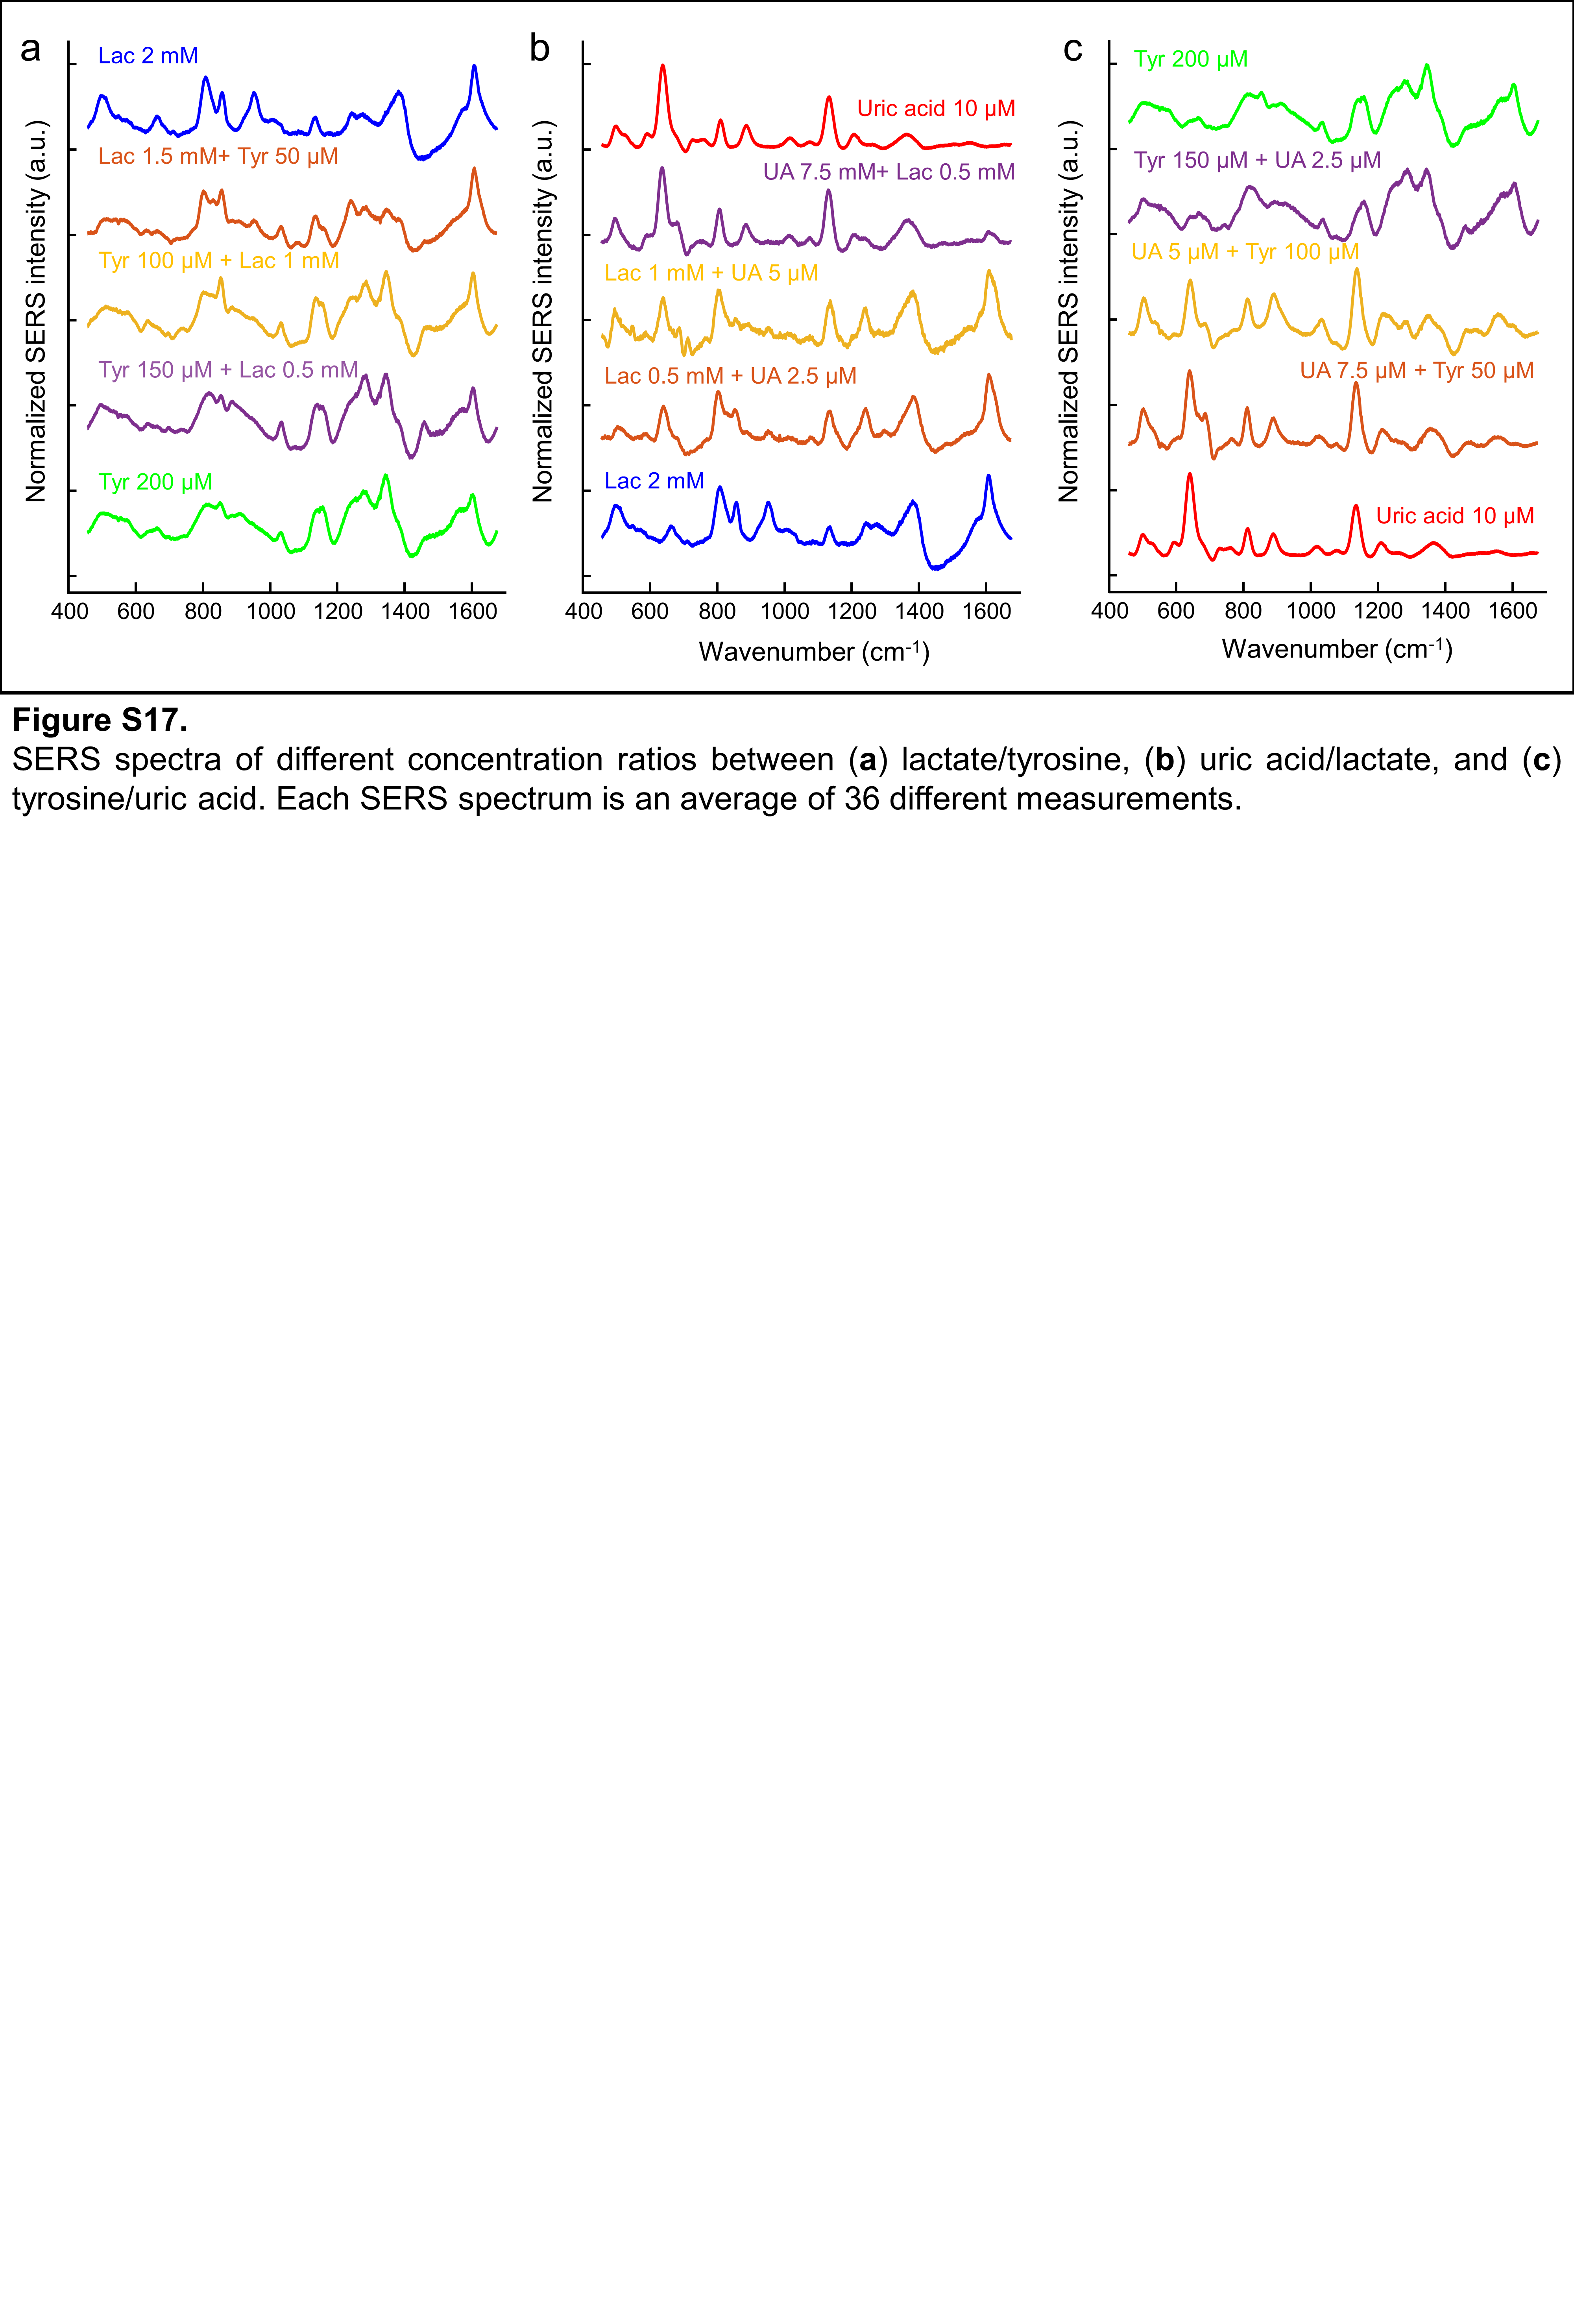


**Figure S18.** SERS spectra of different concentration ratios between (**a**) lactate/tyrosine, (**b**) uric acid/lactate, and (**c**) tyrosine/uric acid. Each SERS spectrum is an average of 36 different measurements.


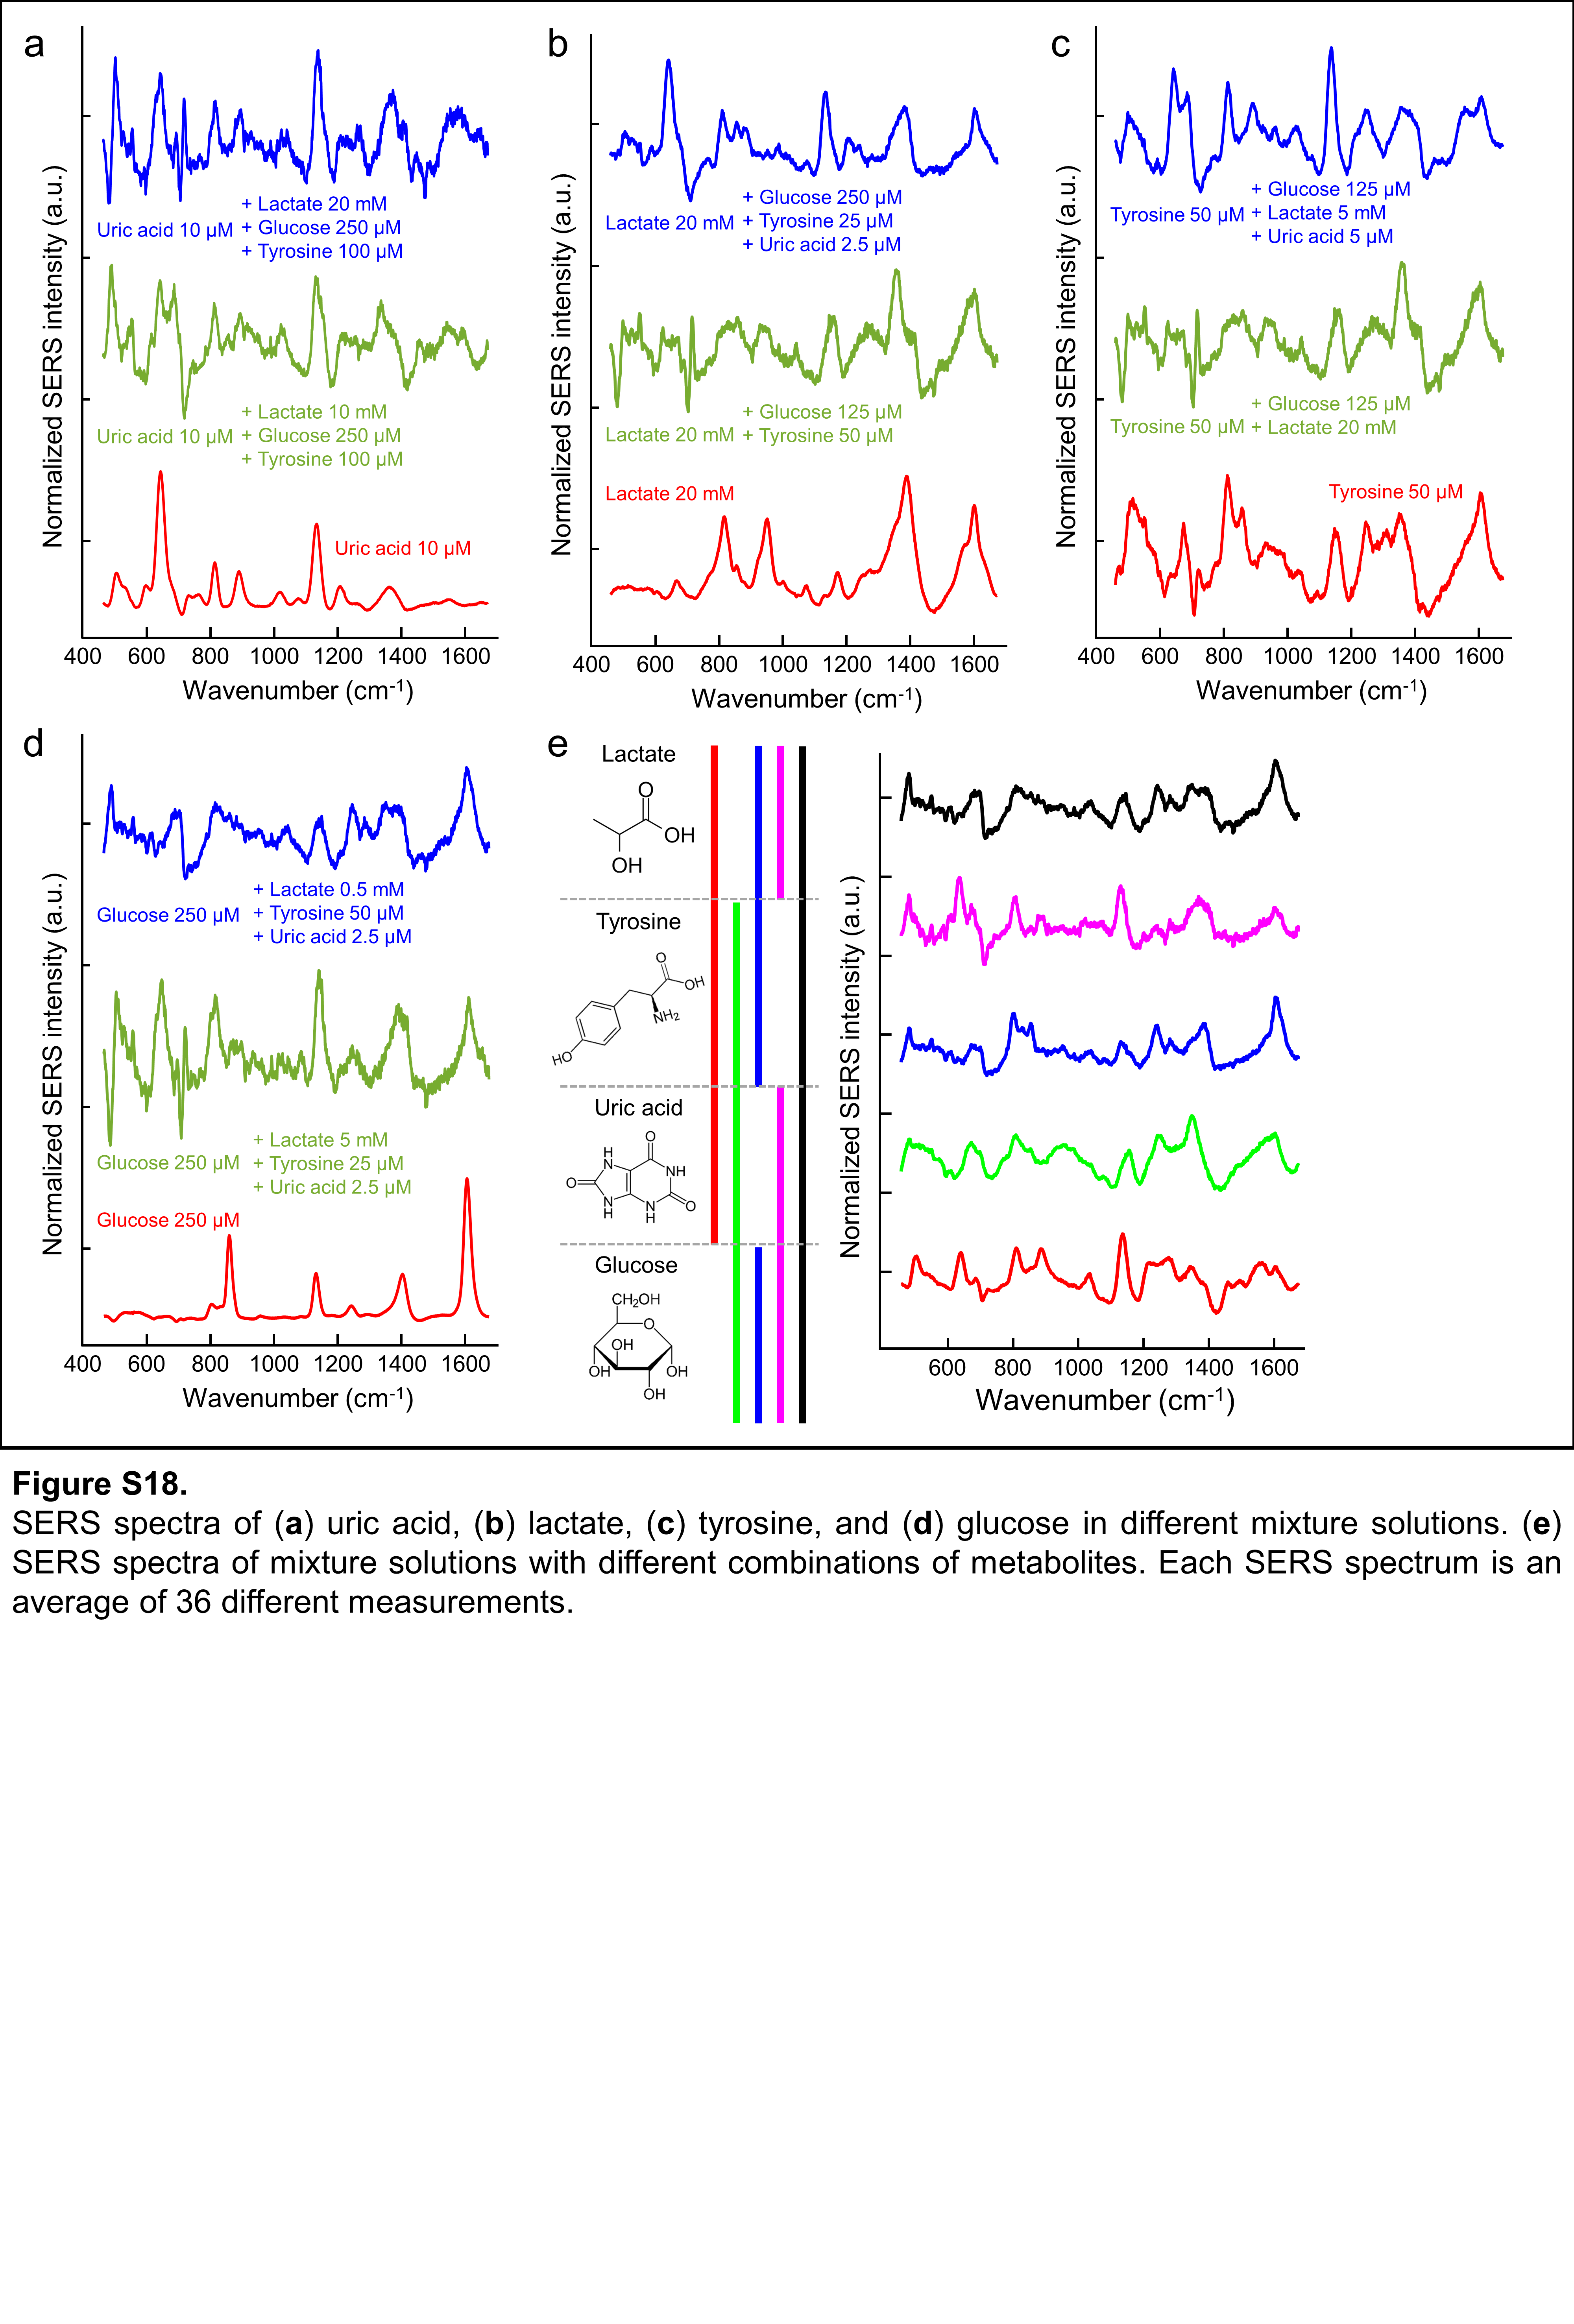


**Figure S19.** Examples of SERS spectra for (**a**) uric acid, (**b**) lactate, (**c**) tyrosine, and (**d**) glucose in different mixture solutions. (**e**) SERS spectra of mixture solutions with different combinations of metabolites. Each SERS spectrum is an average of 36 different measurements.


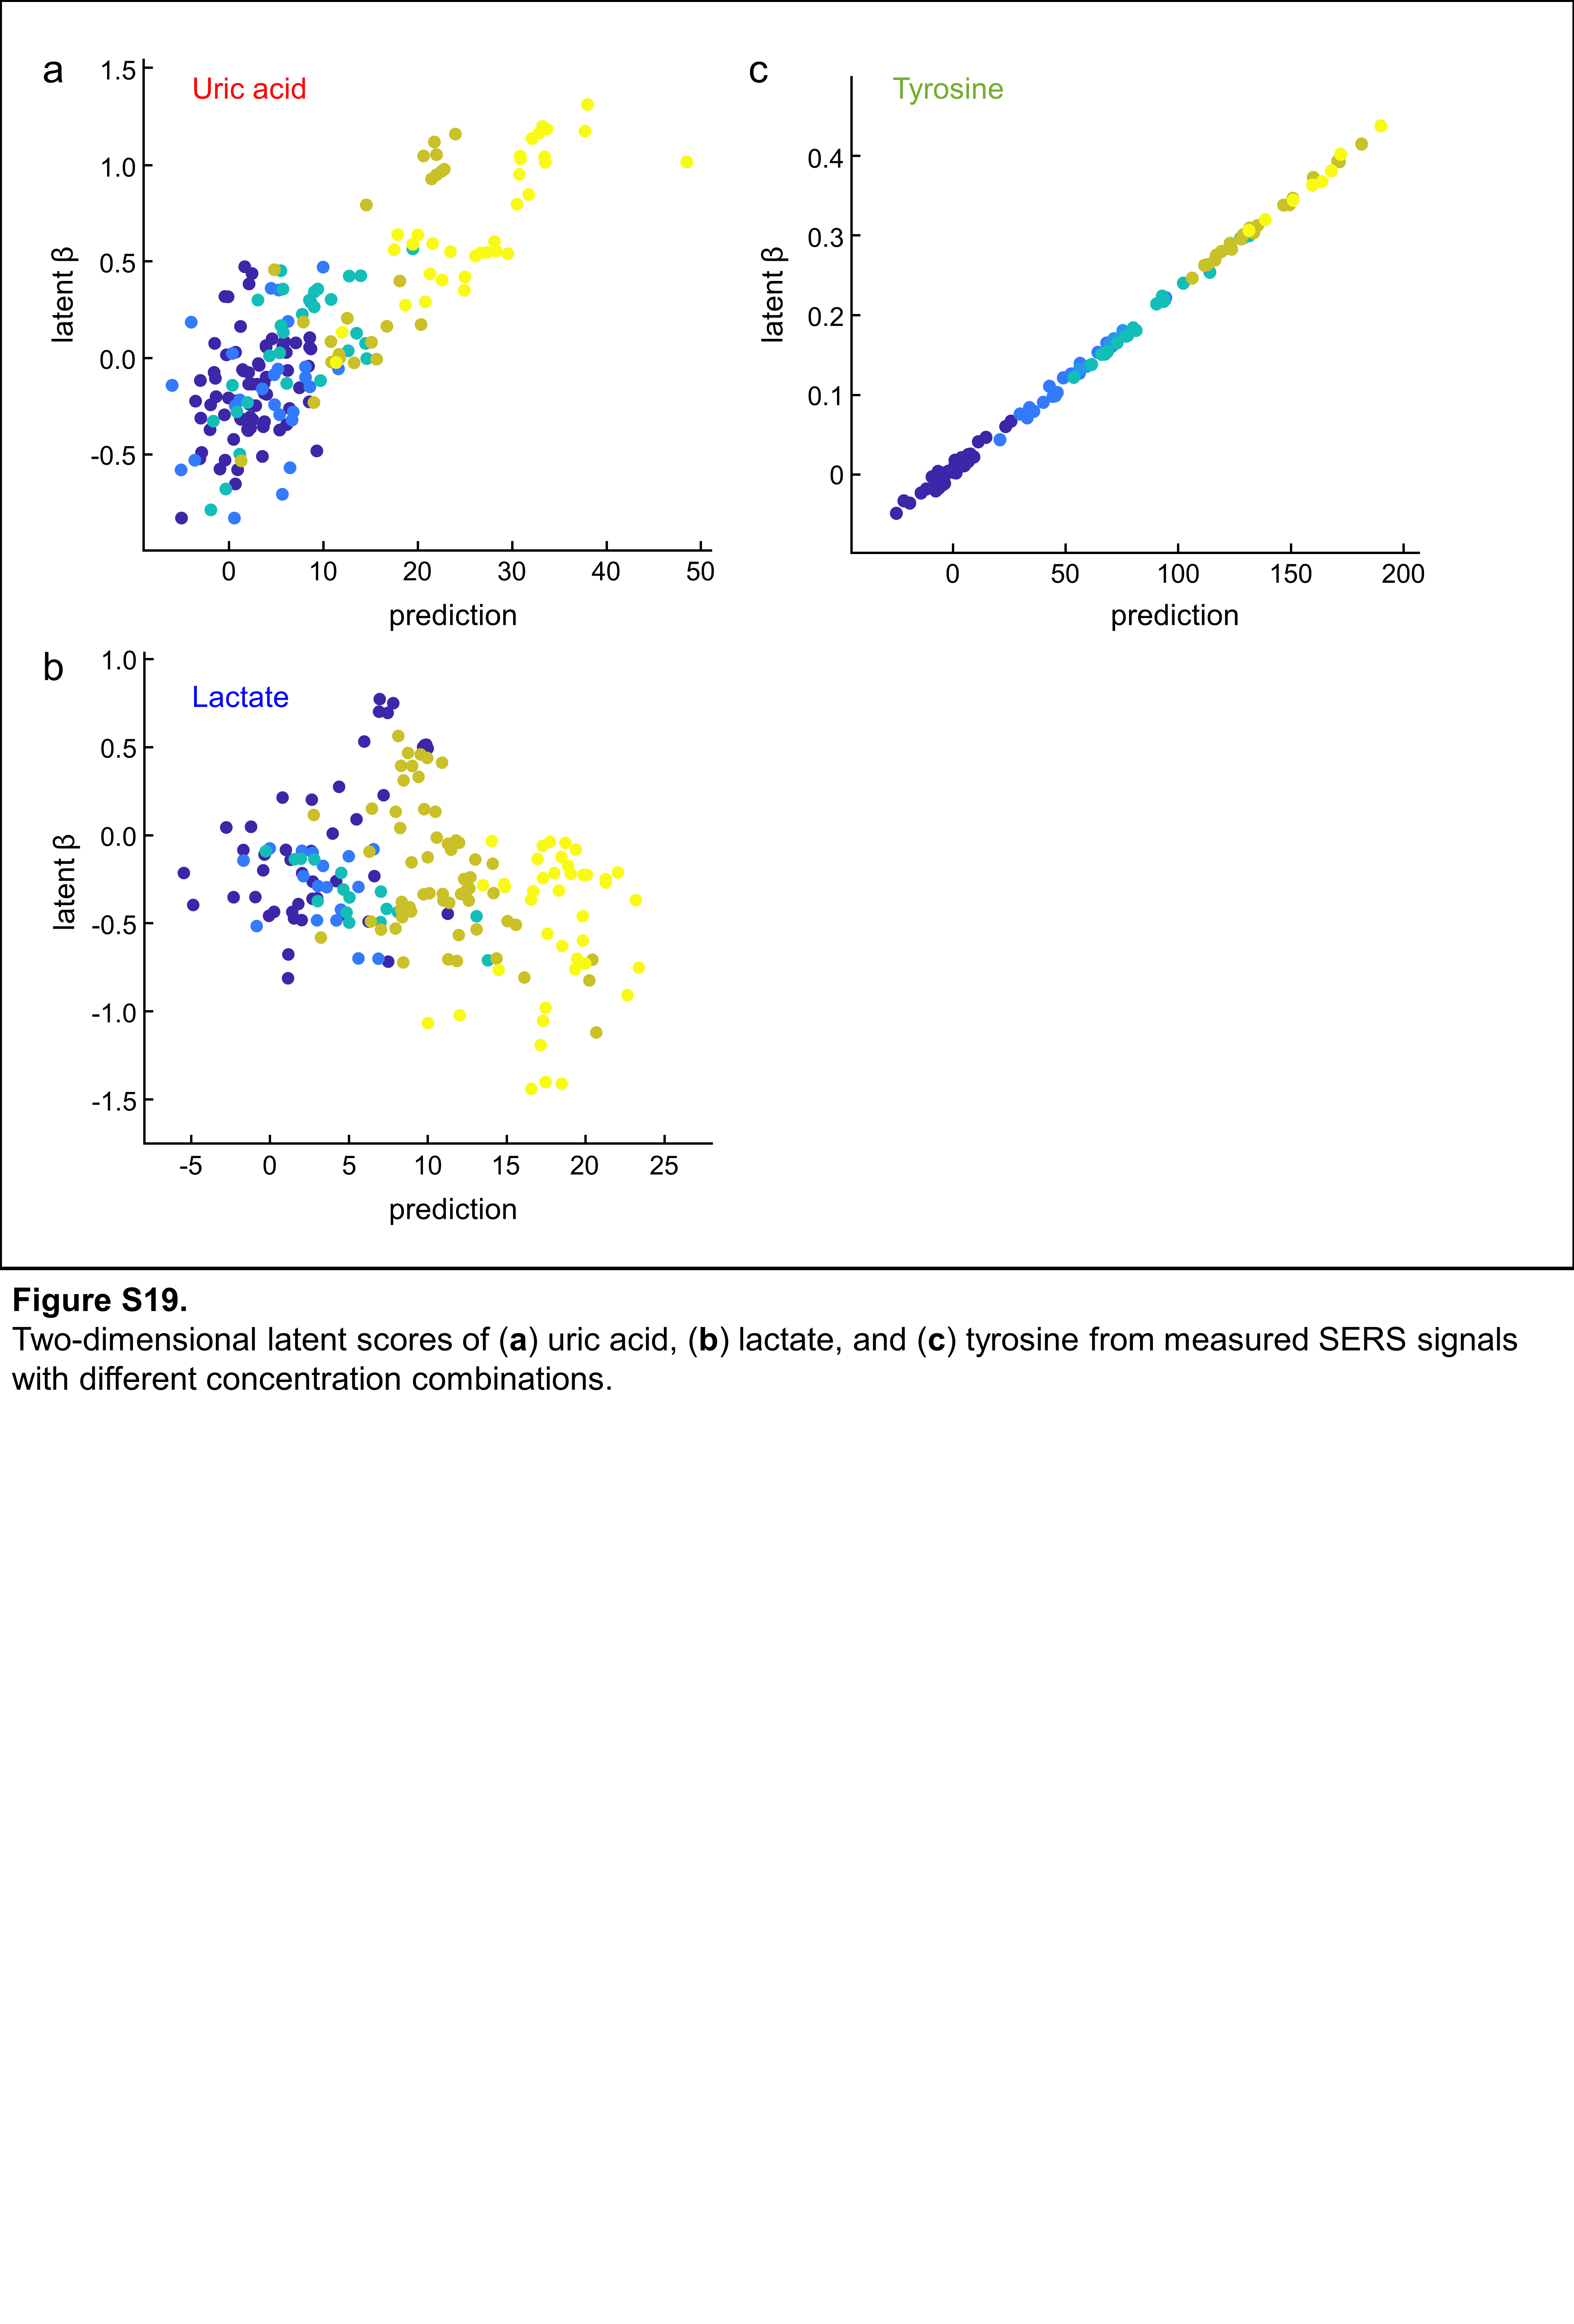


**Figure S20.** Two-dimensional latent scores of (**a**) uric acid, (**b**) lactate, and (**c**) tyrosine from measured SERS signals with different concentrations. Each color represents the different concentrations of the target metabolite in the mixture solution.


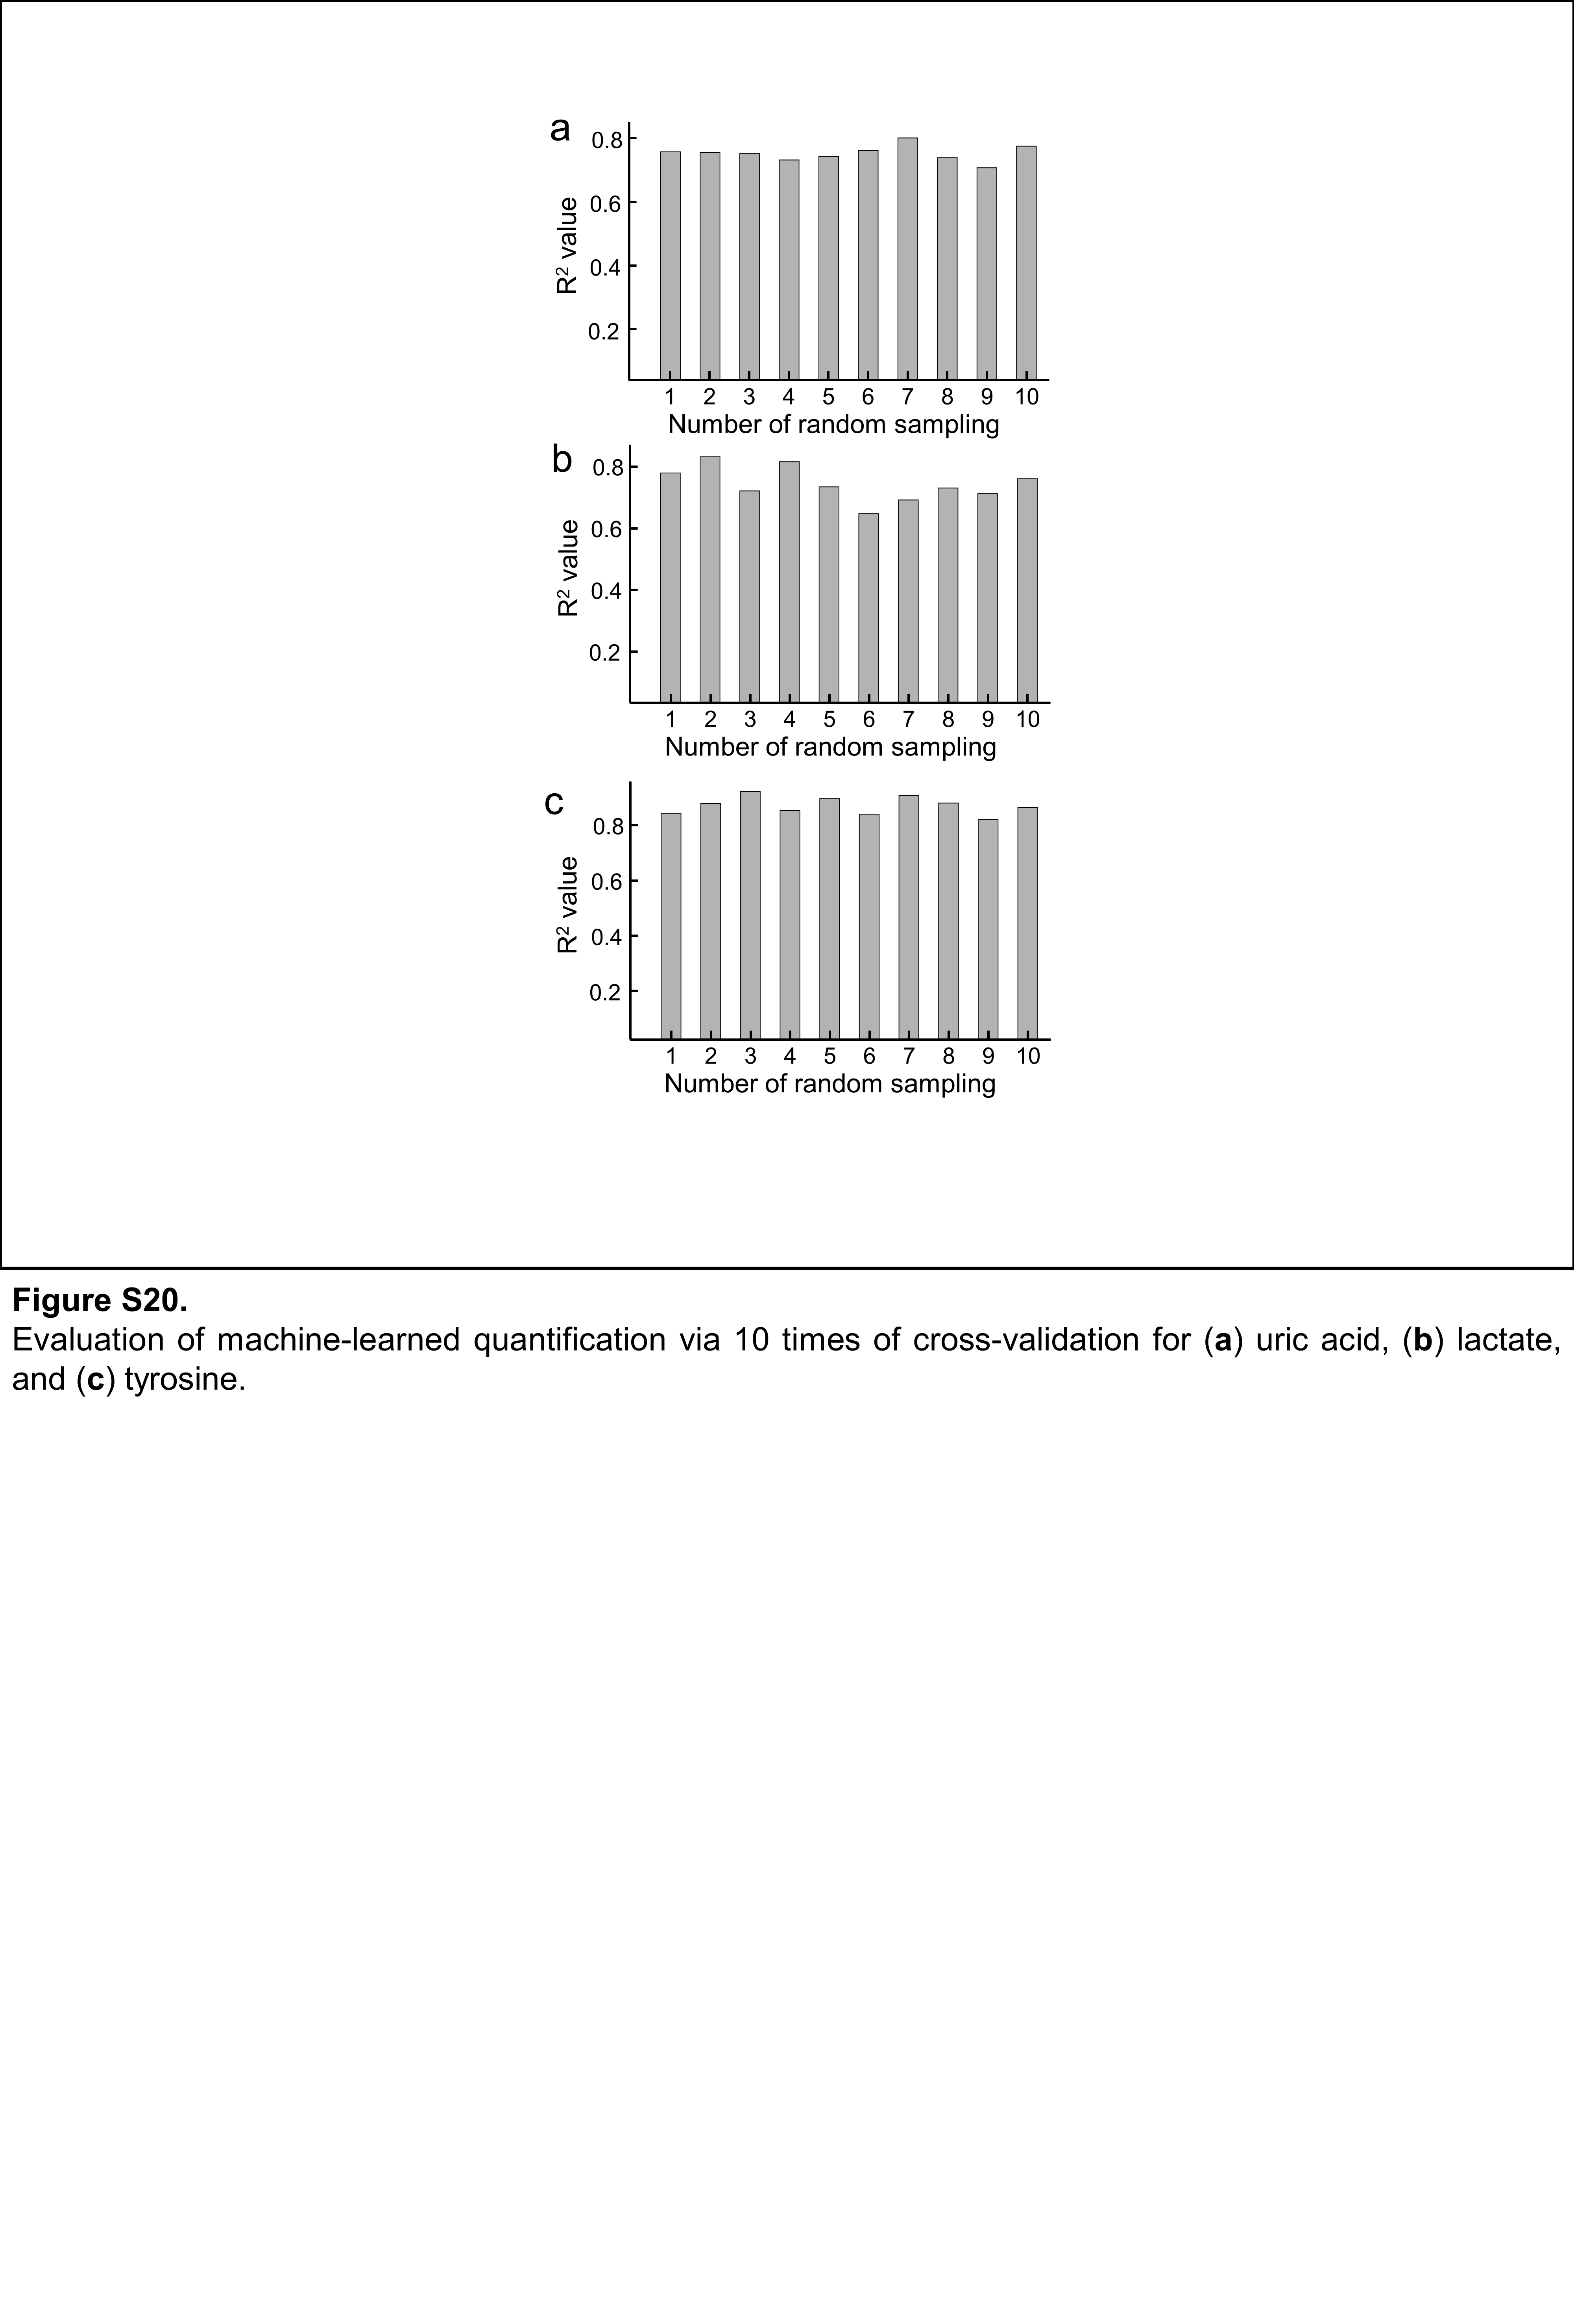


**Figure S21.** Evaluation of machine-learned quantification through 10 times repeated random sampling cross-validation for (**a**) uric acid, (**b**) lactate, and (**c**) tyrosine.


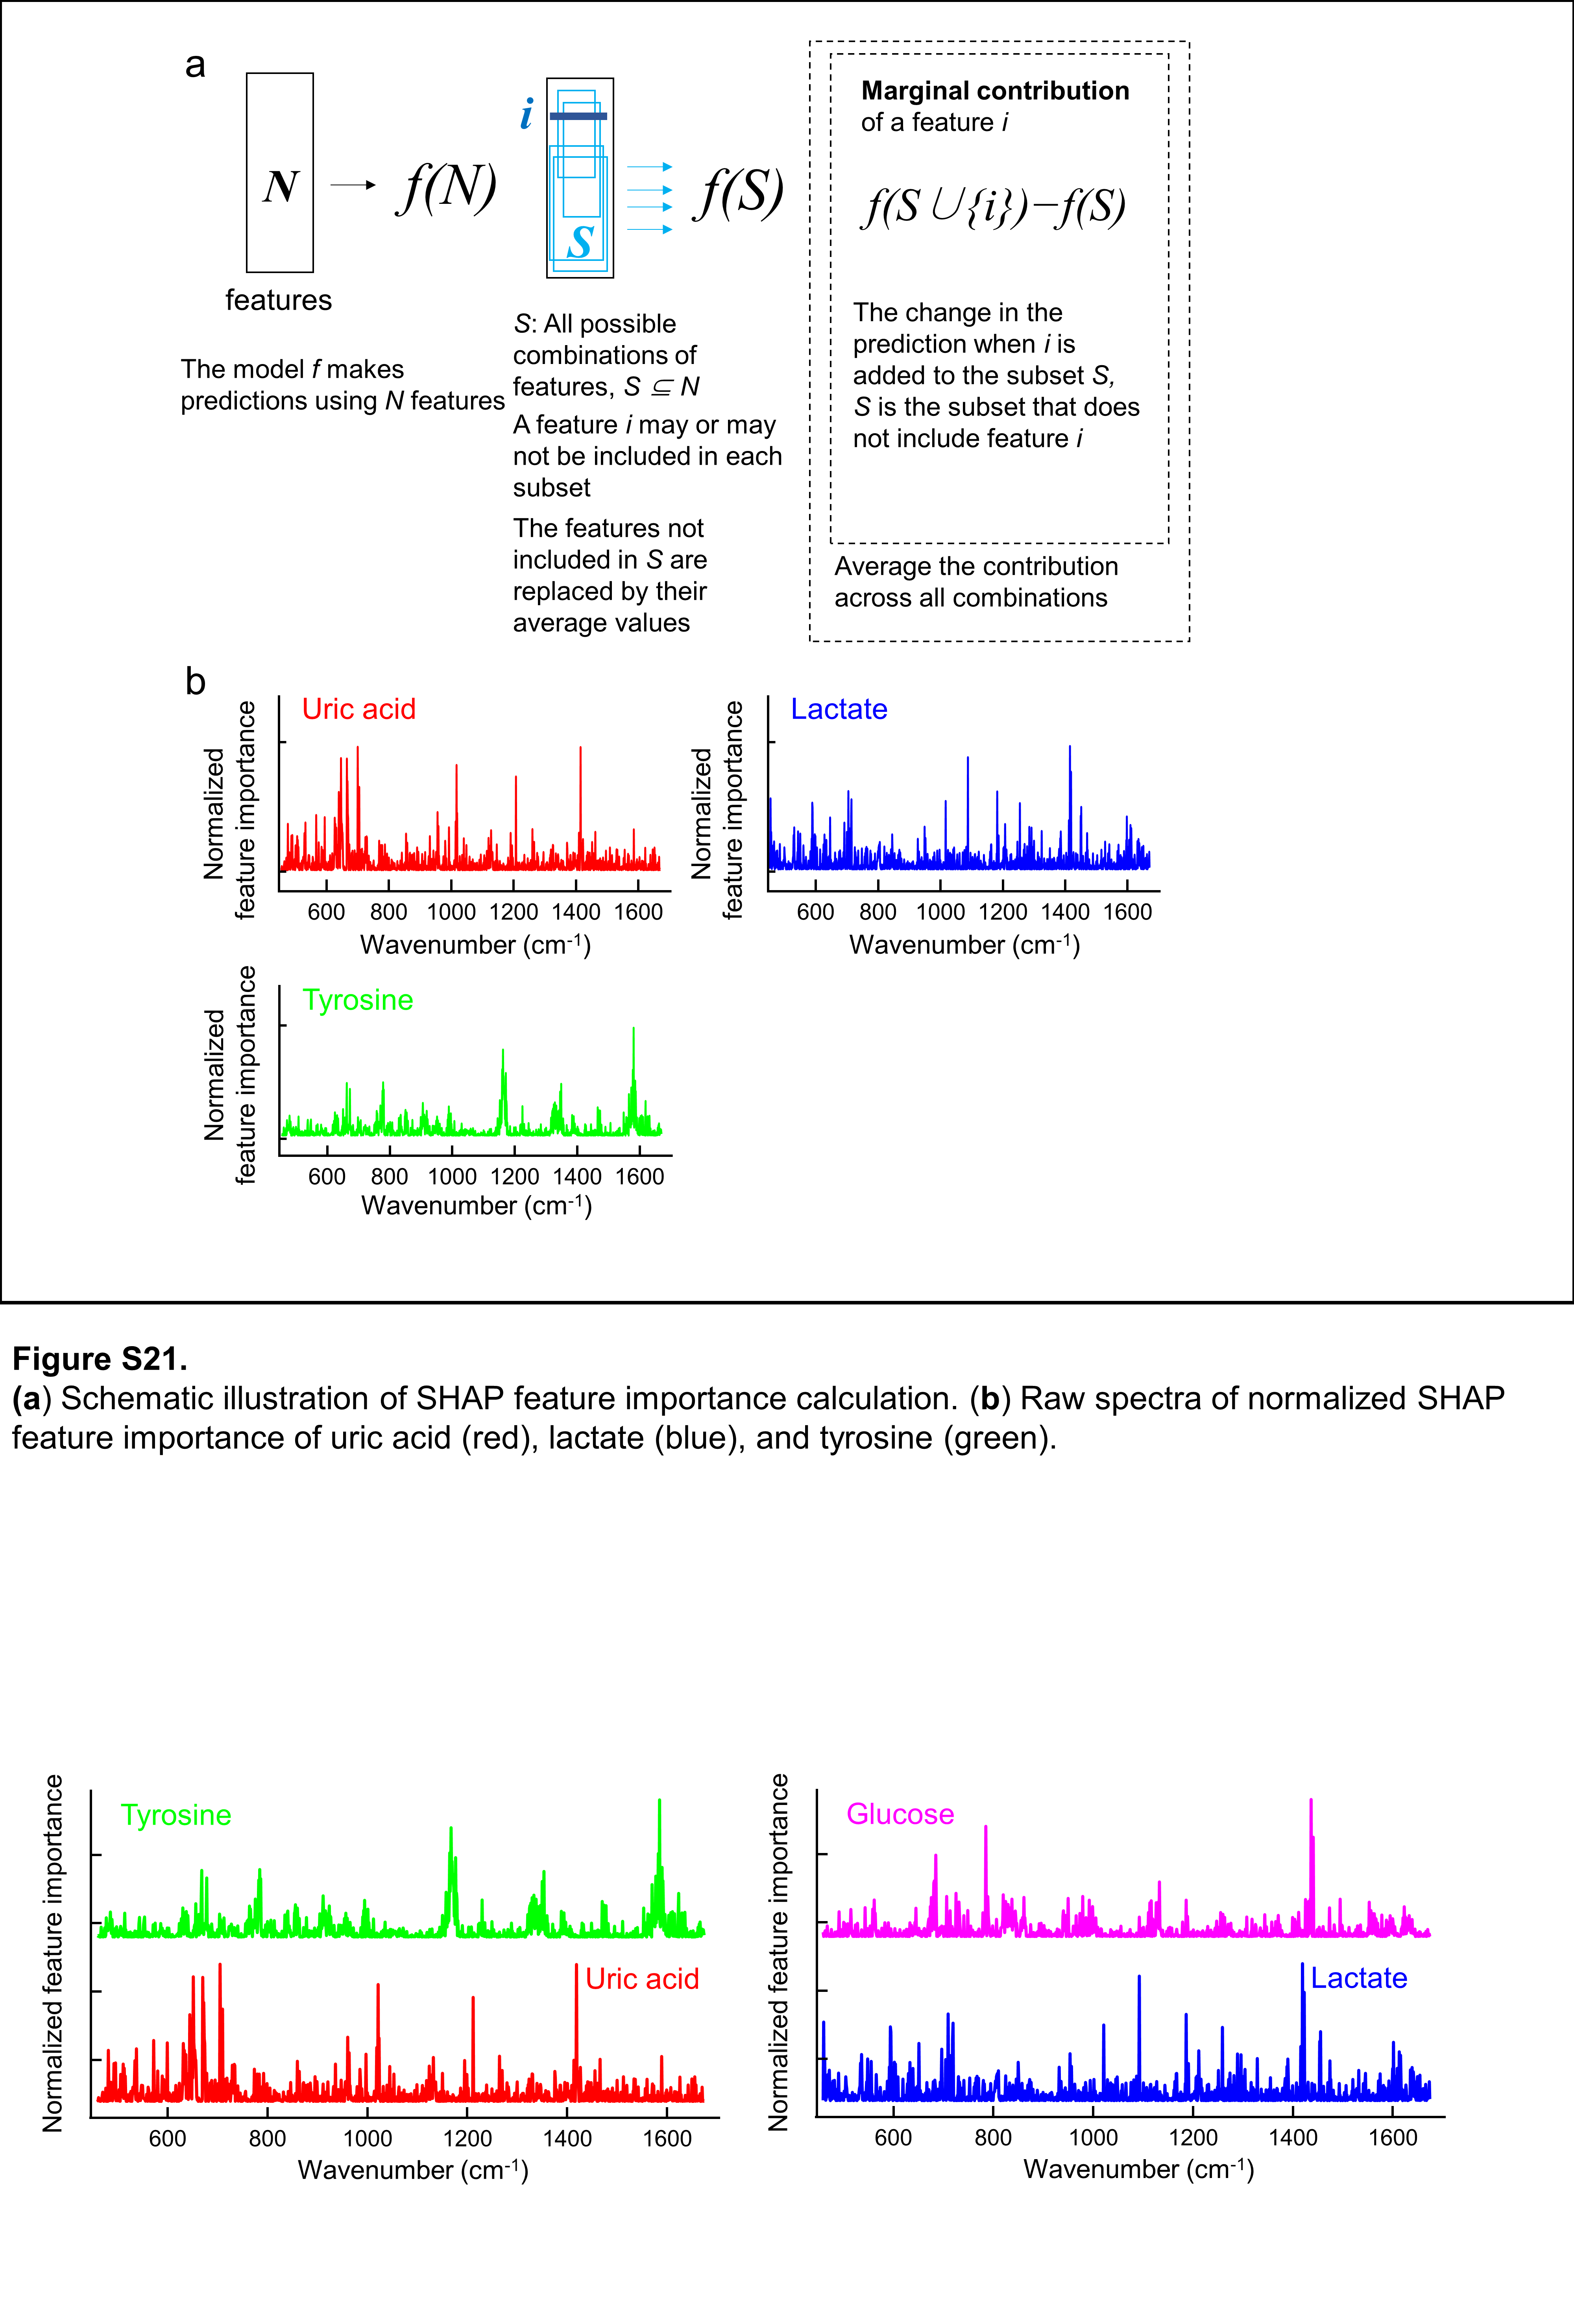


**Figure S22.** **(a**) Schematic illustration of SHAP feature importance calculation. (**b**) Raw spectra of the normalized SHAP feature importance of uric acid (red), lactate (blue), and tyrosine (green).


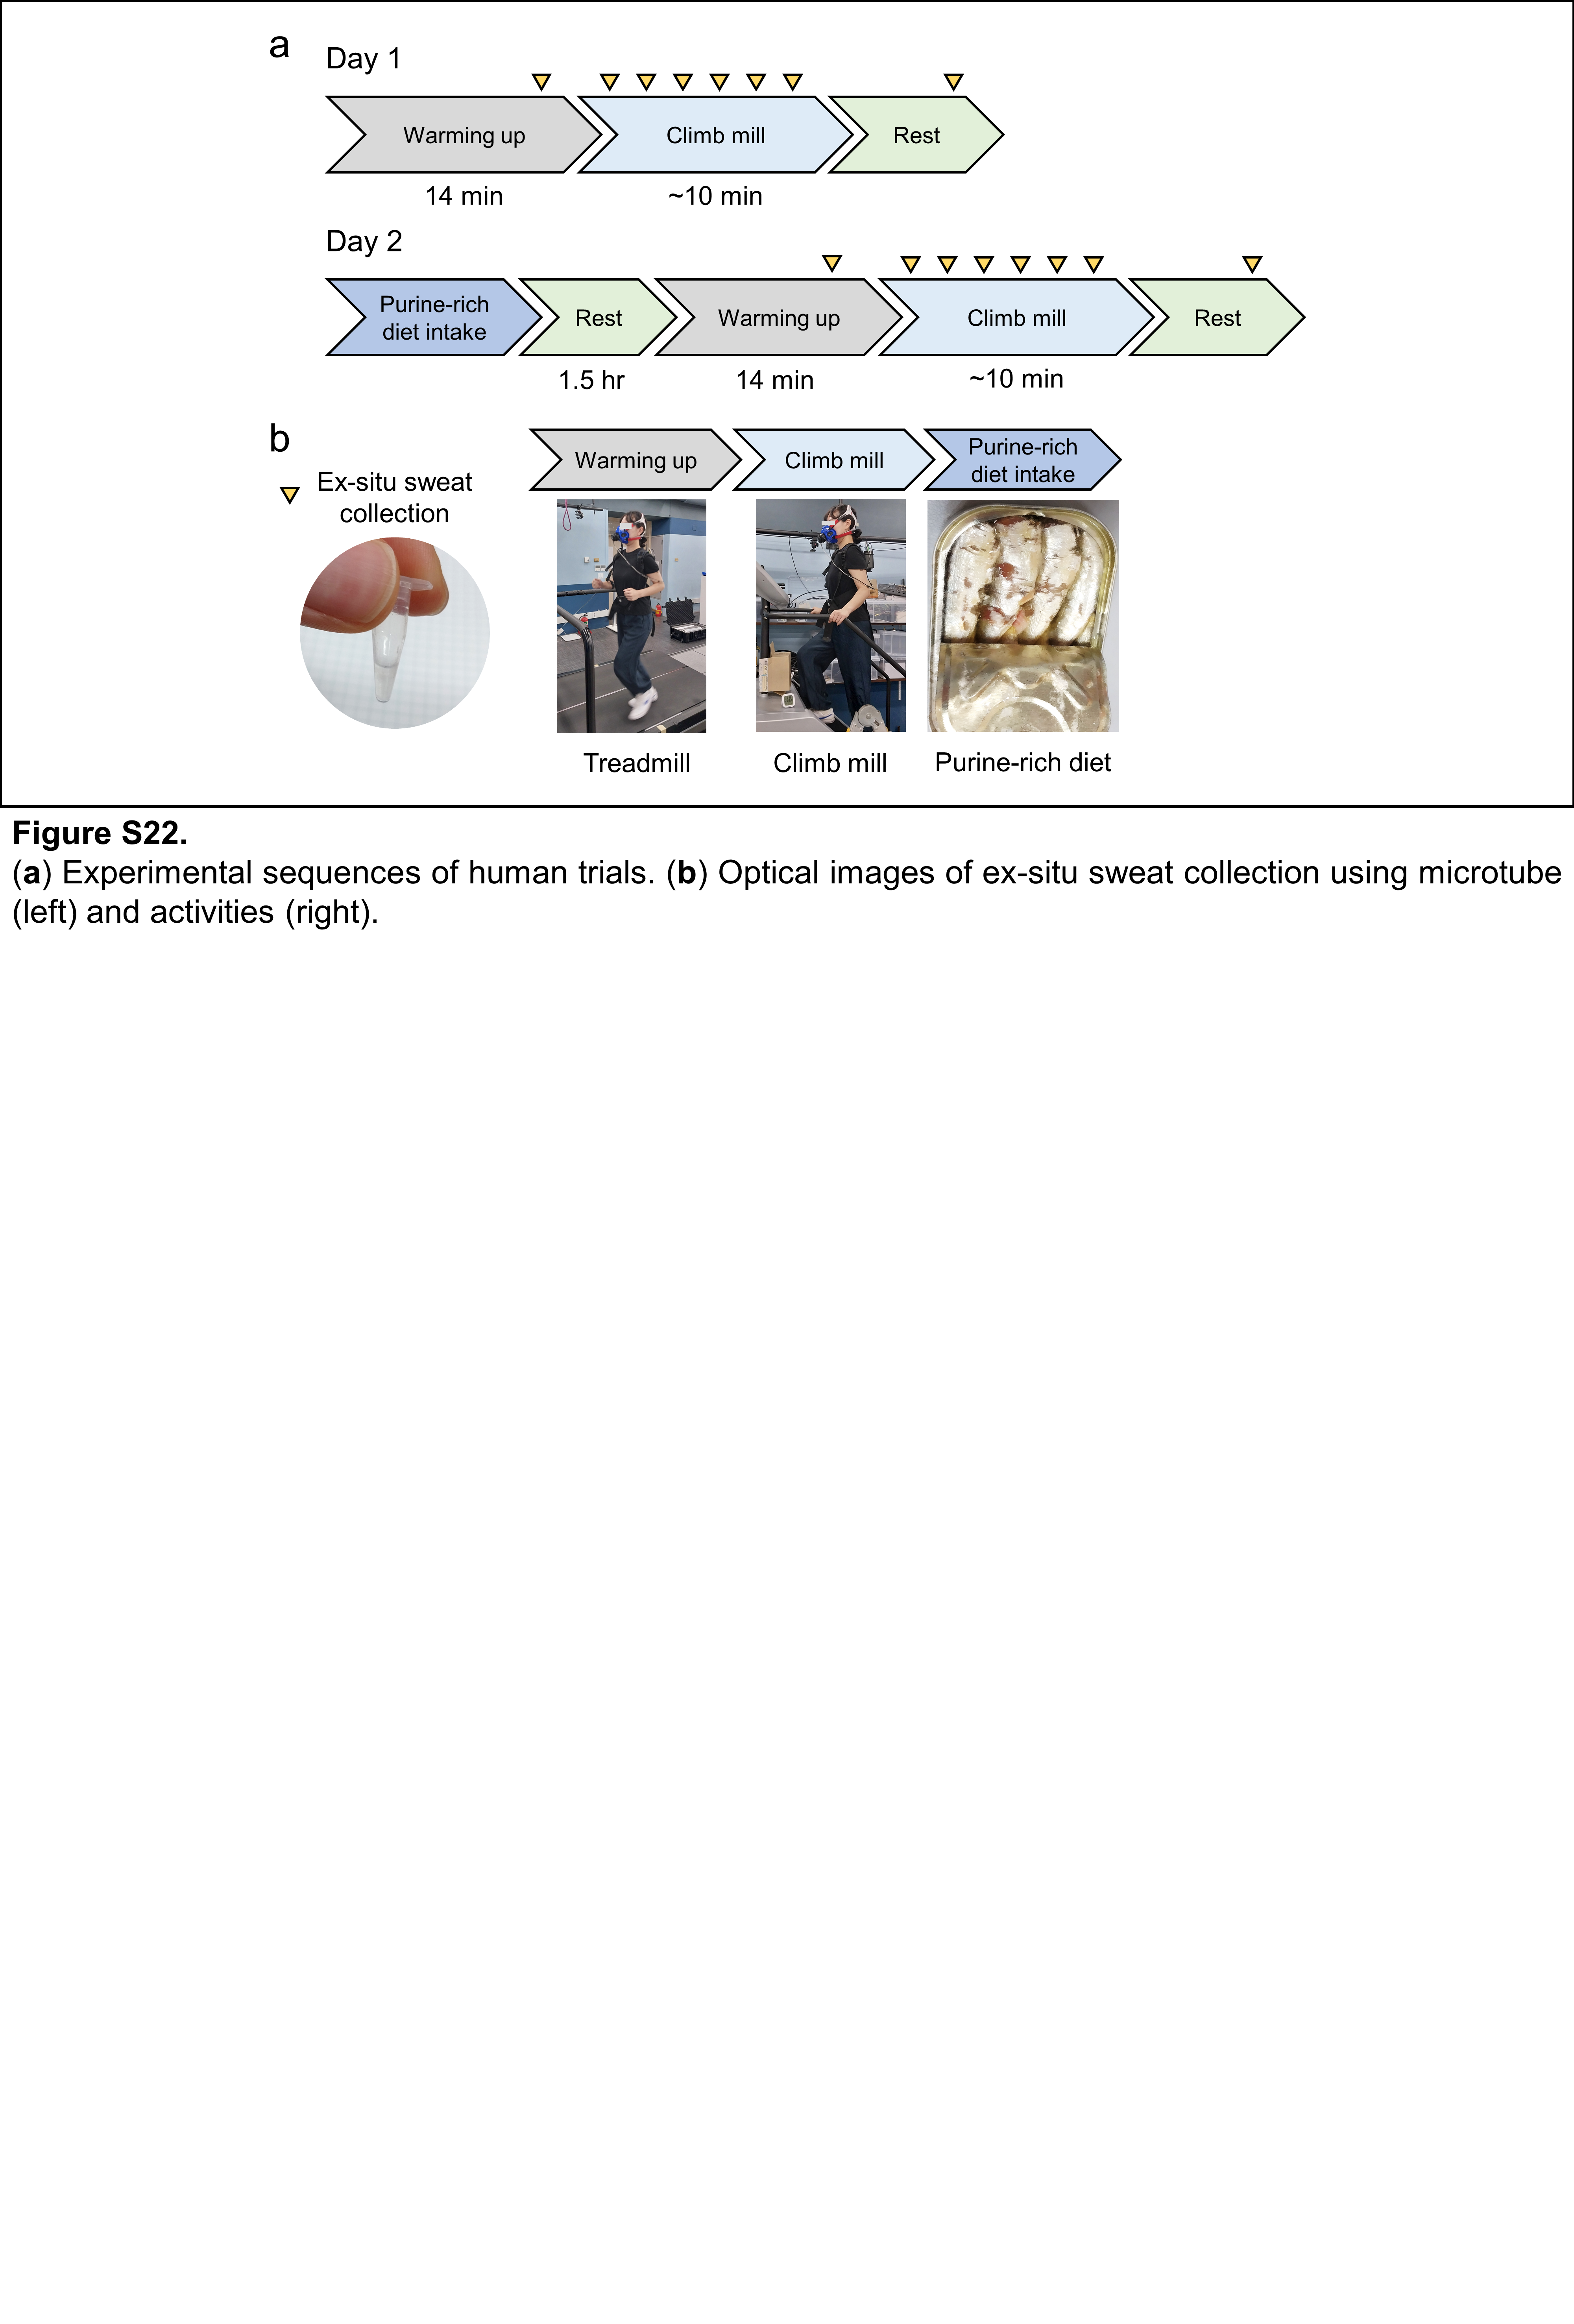


**Figure S23.** (**a**) Experimental protocols of the on-body evaluation. (**b**) Optical images of sweat collection using microtube (left) and assorted activities (right). The triangular markers represent the sweat collection during exercise for sensor validation.


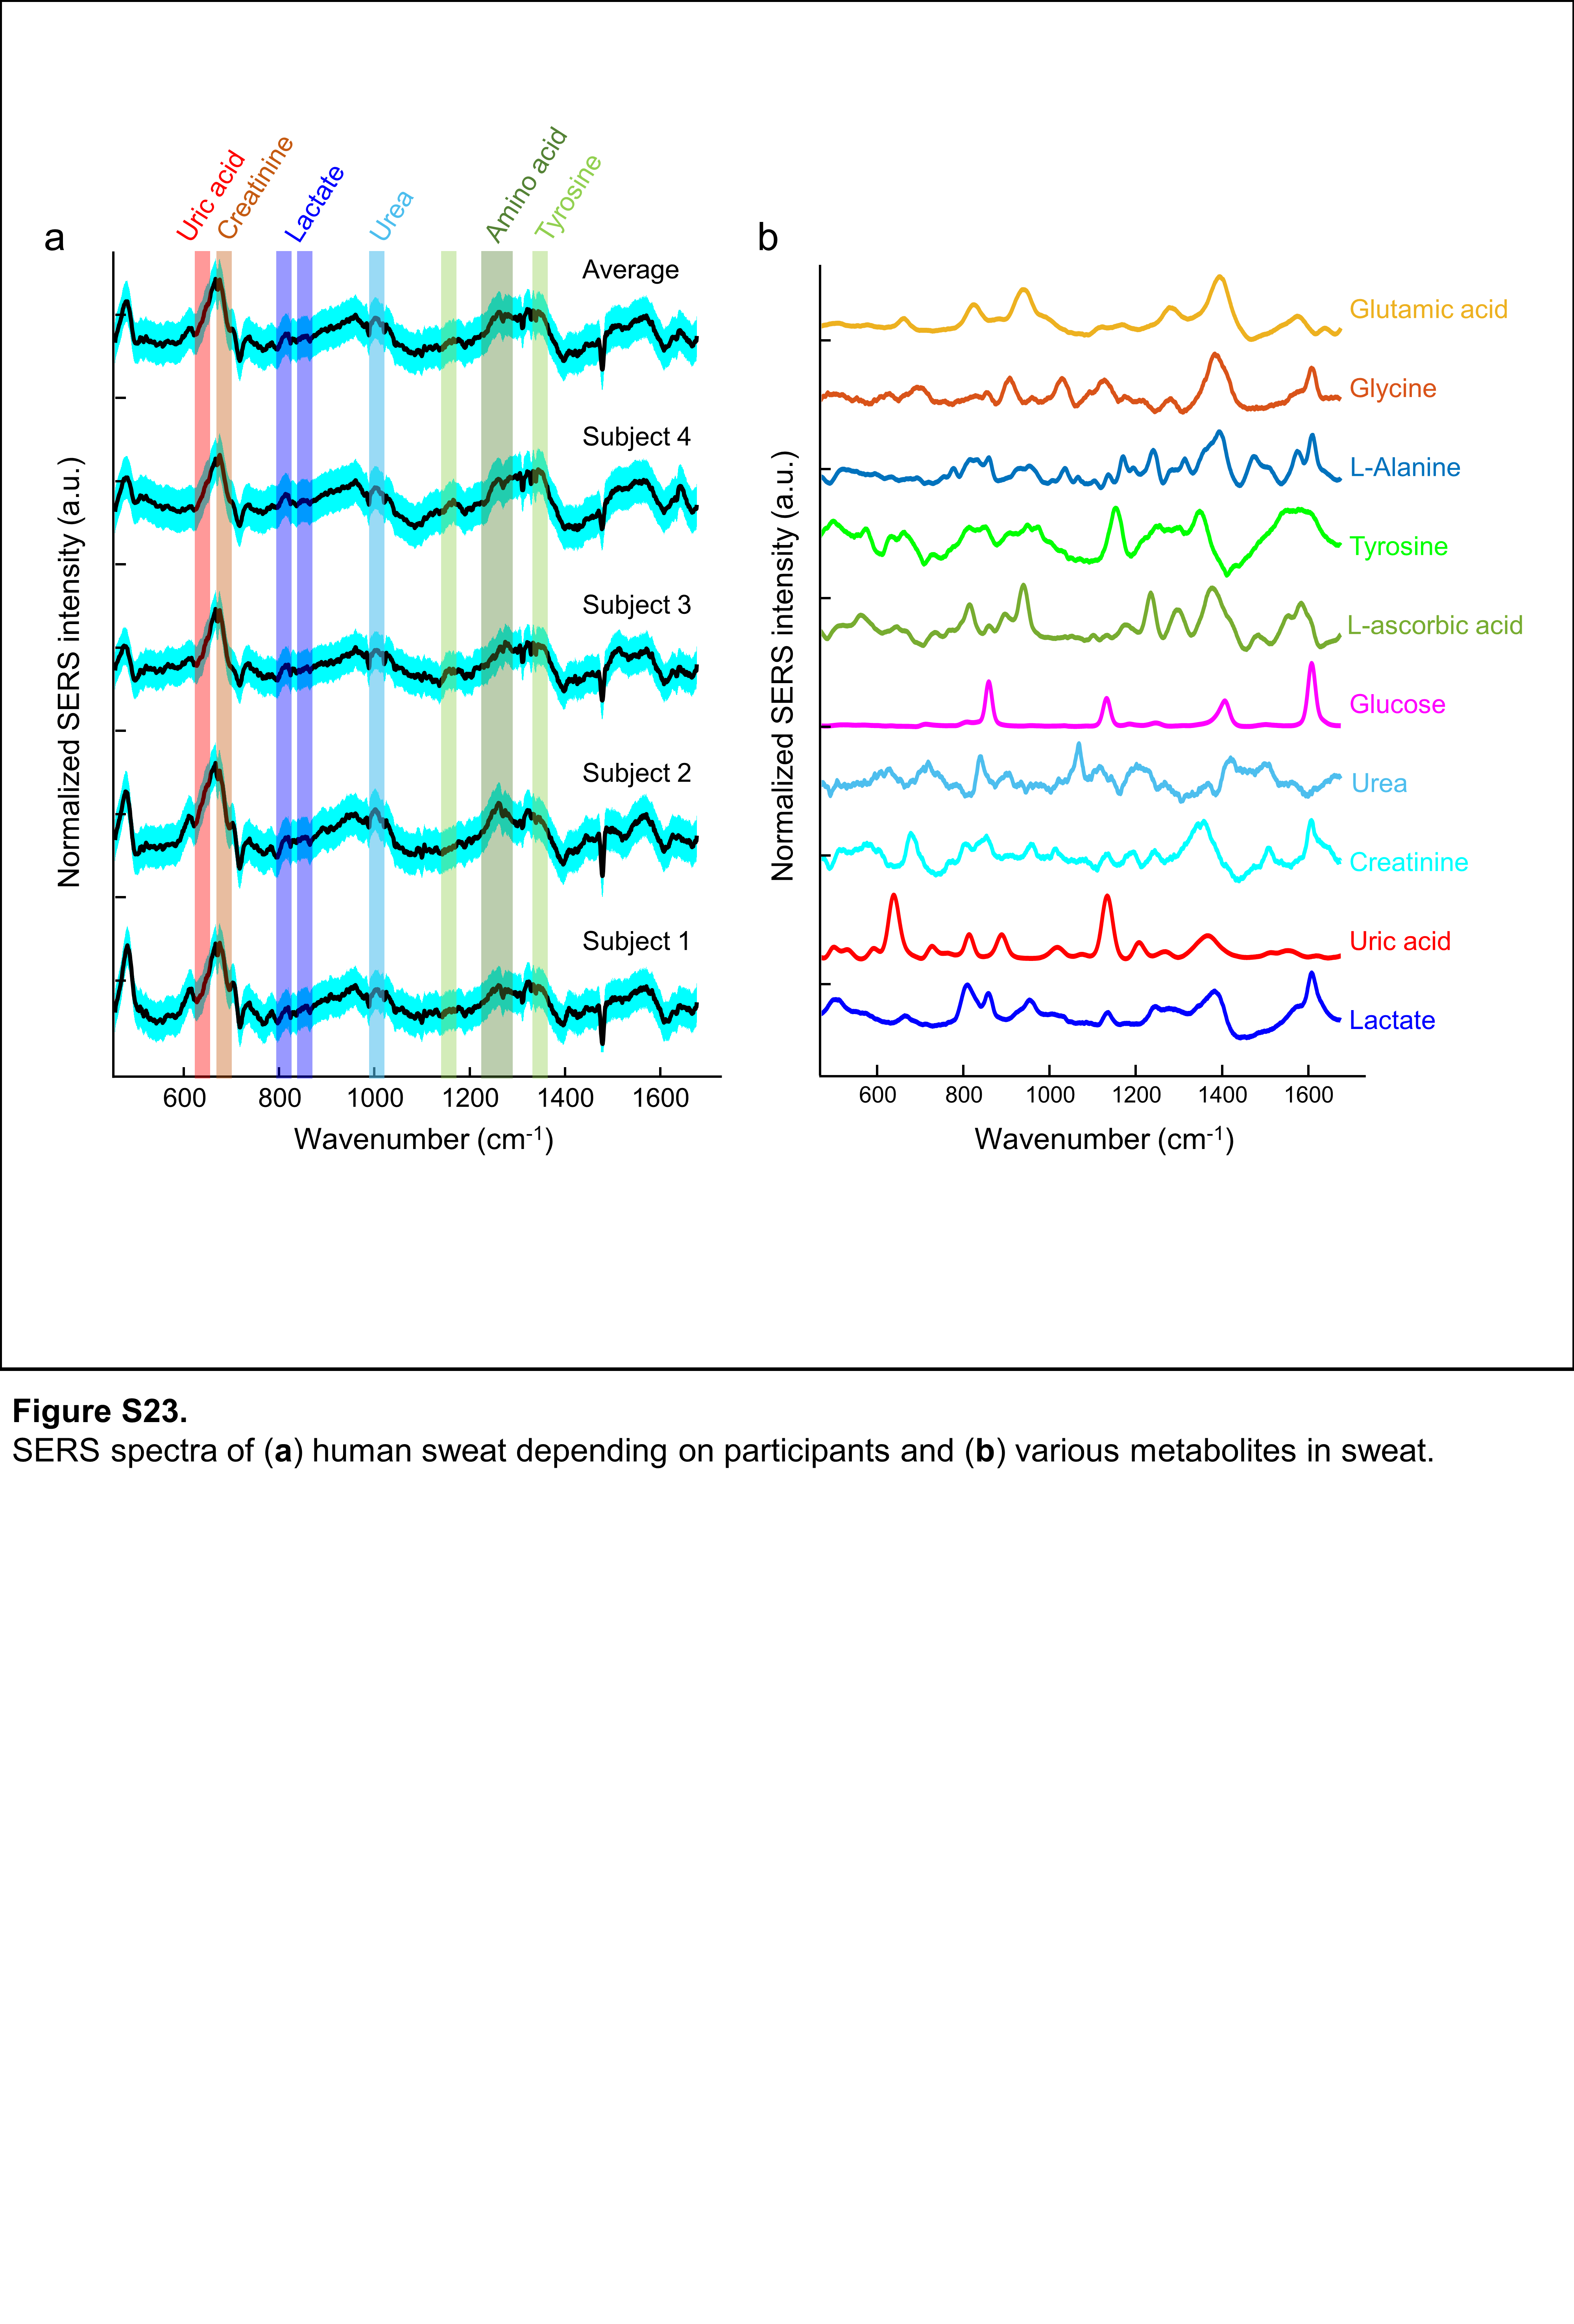


**Figure S24.** SERS spectra of (**a**) human sweat depending on participants and (**b**) various metabolites in sweat.


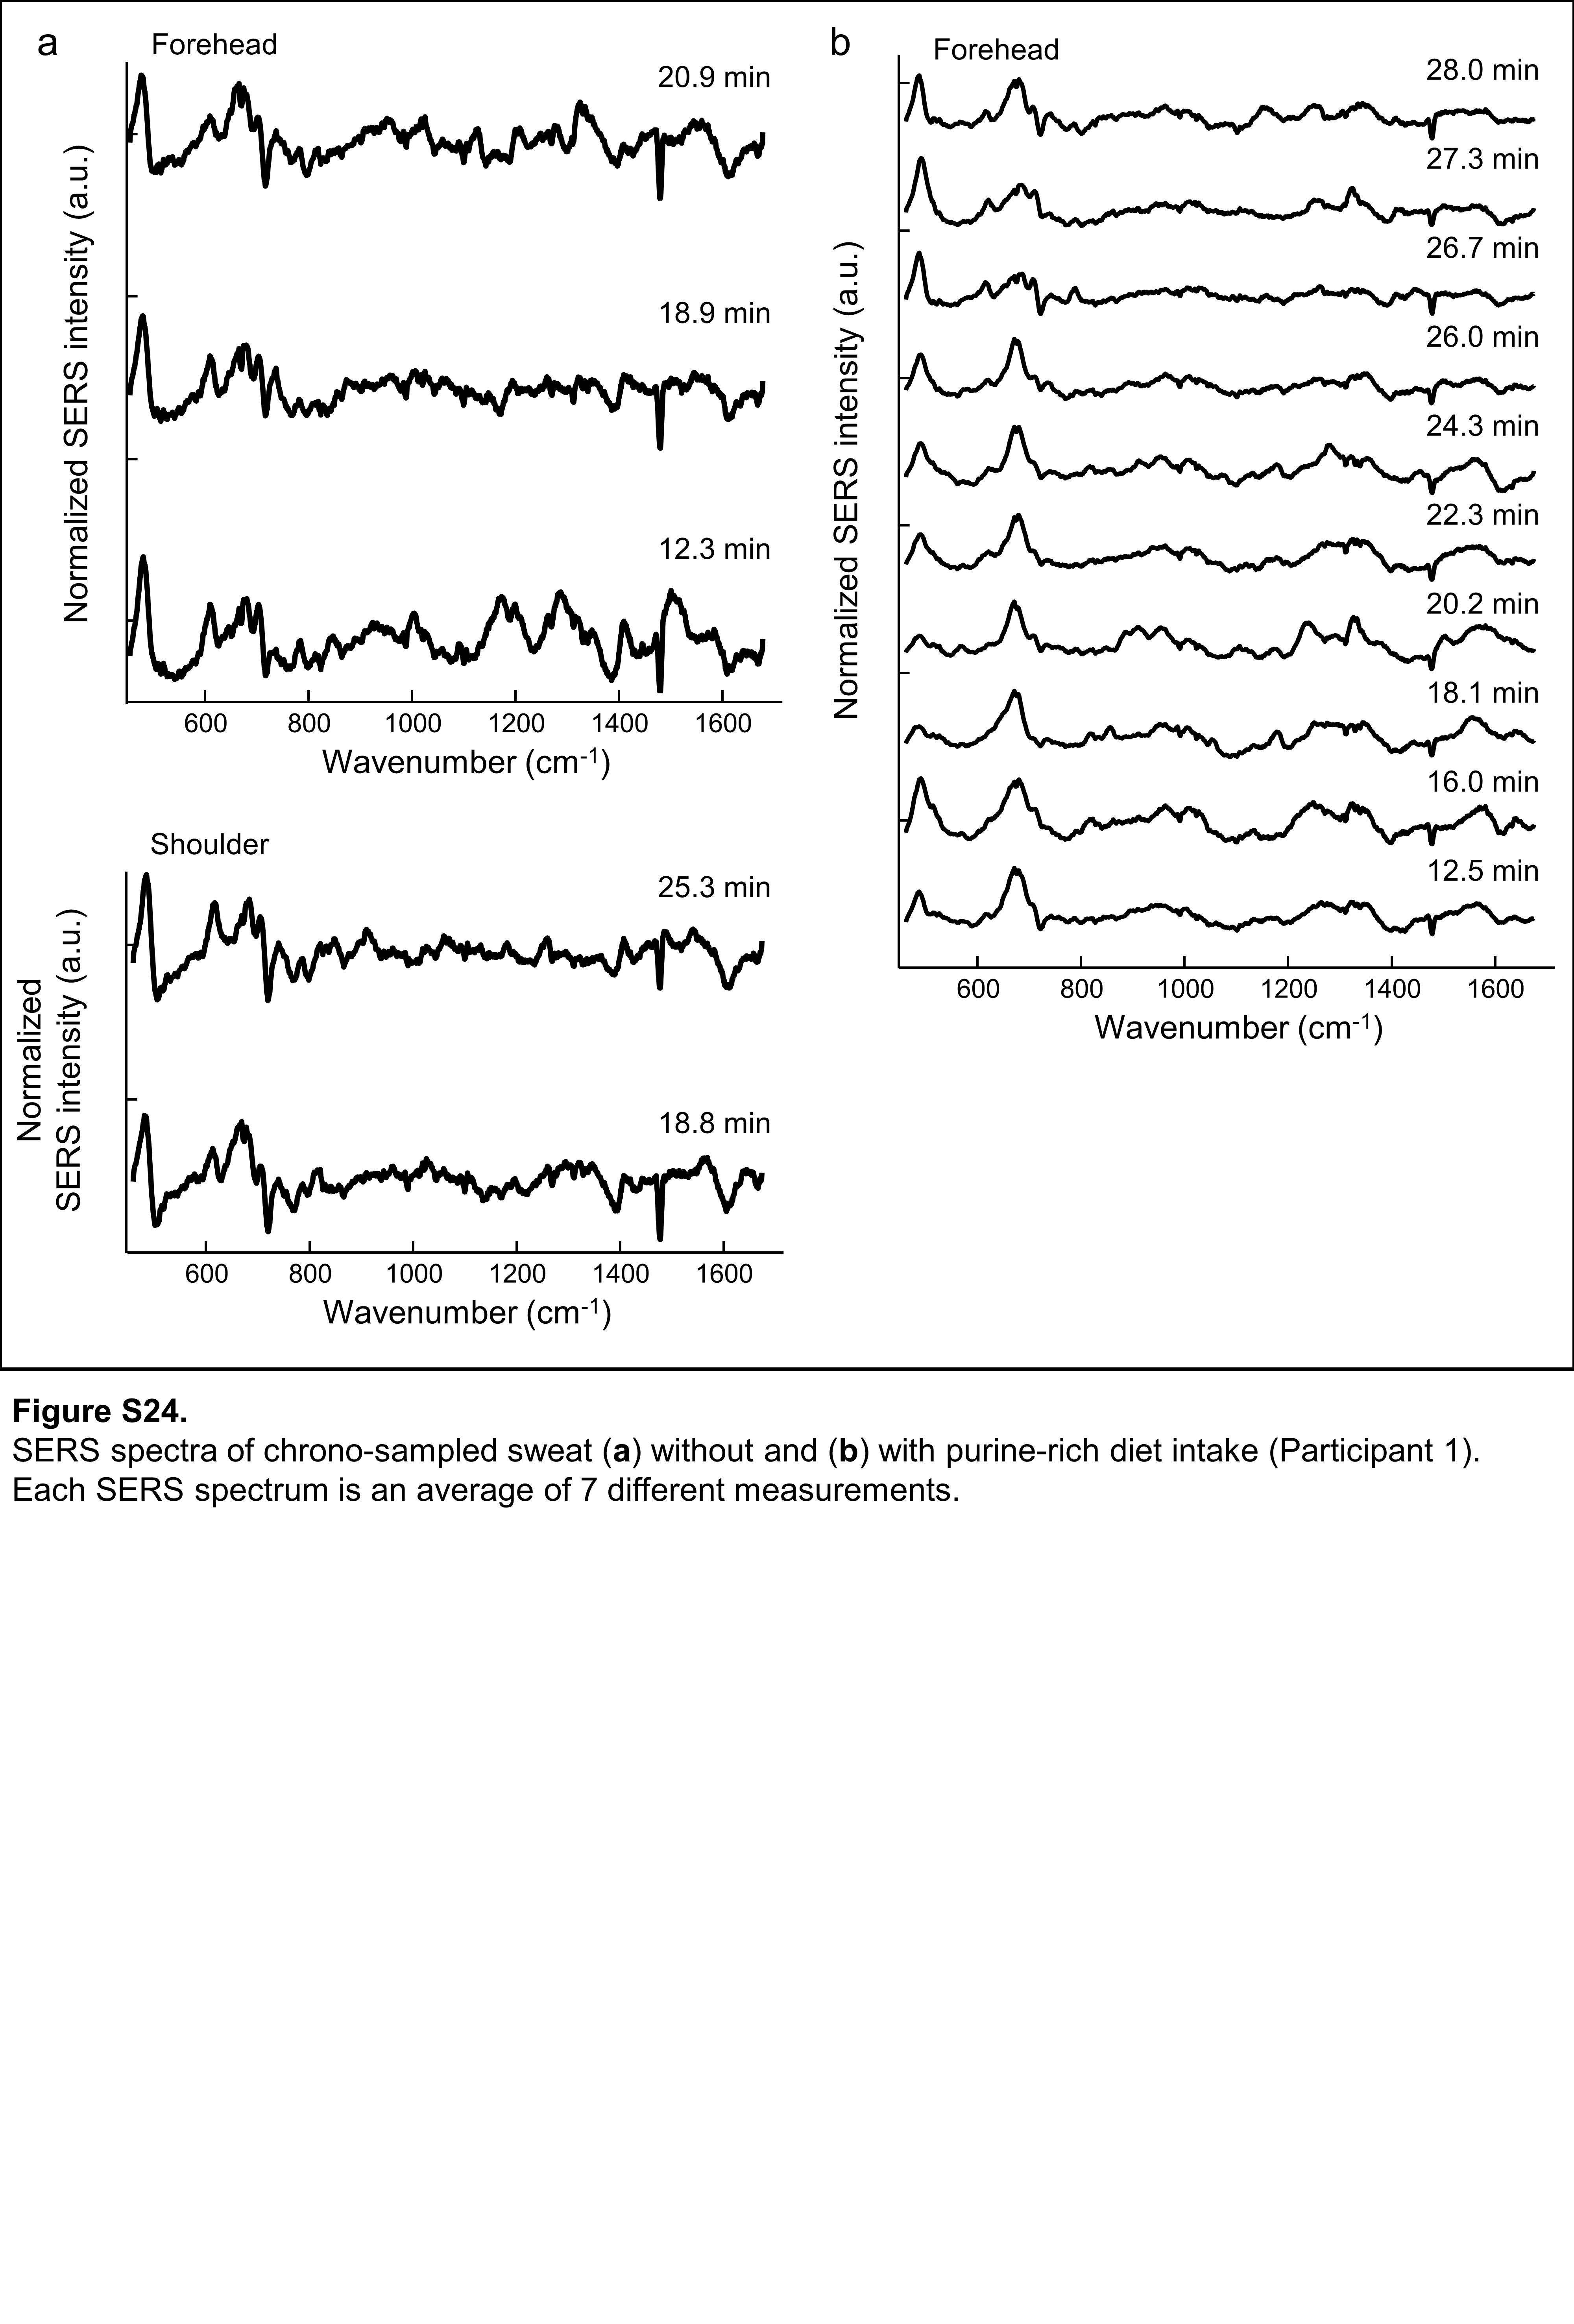


**Figure S25.** SERS spectra of chrono-sampled sweat under (**a**) fasting condition and (**b**) purine-rich diet intake (Participant 1). Each SERS spectrum is an average of 7 different measurements.


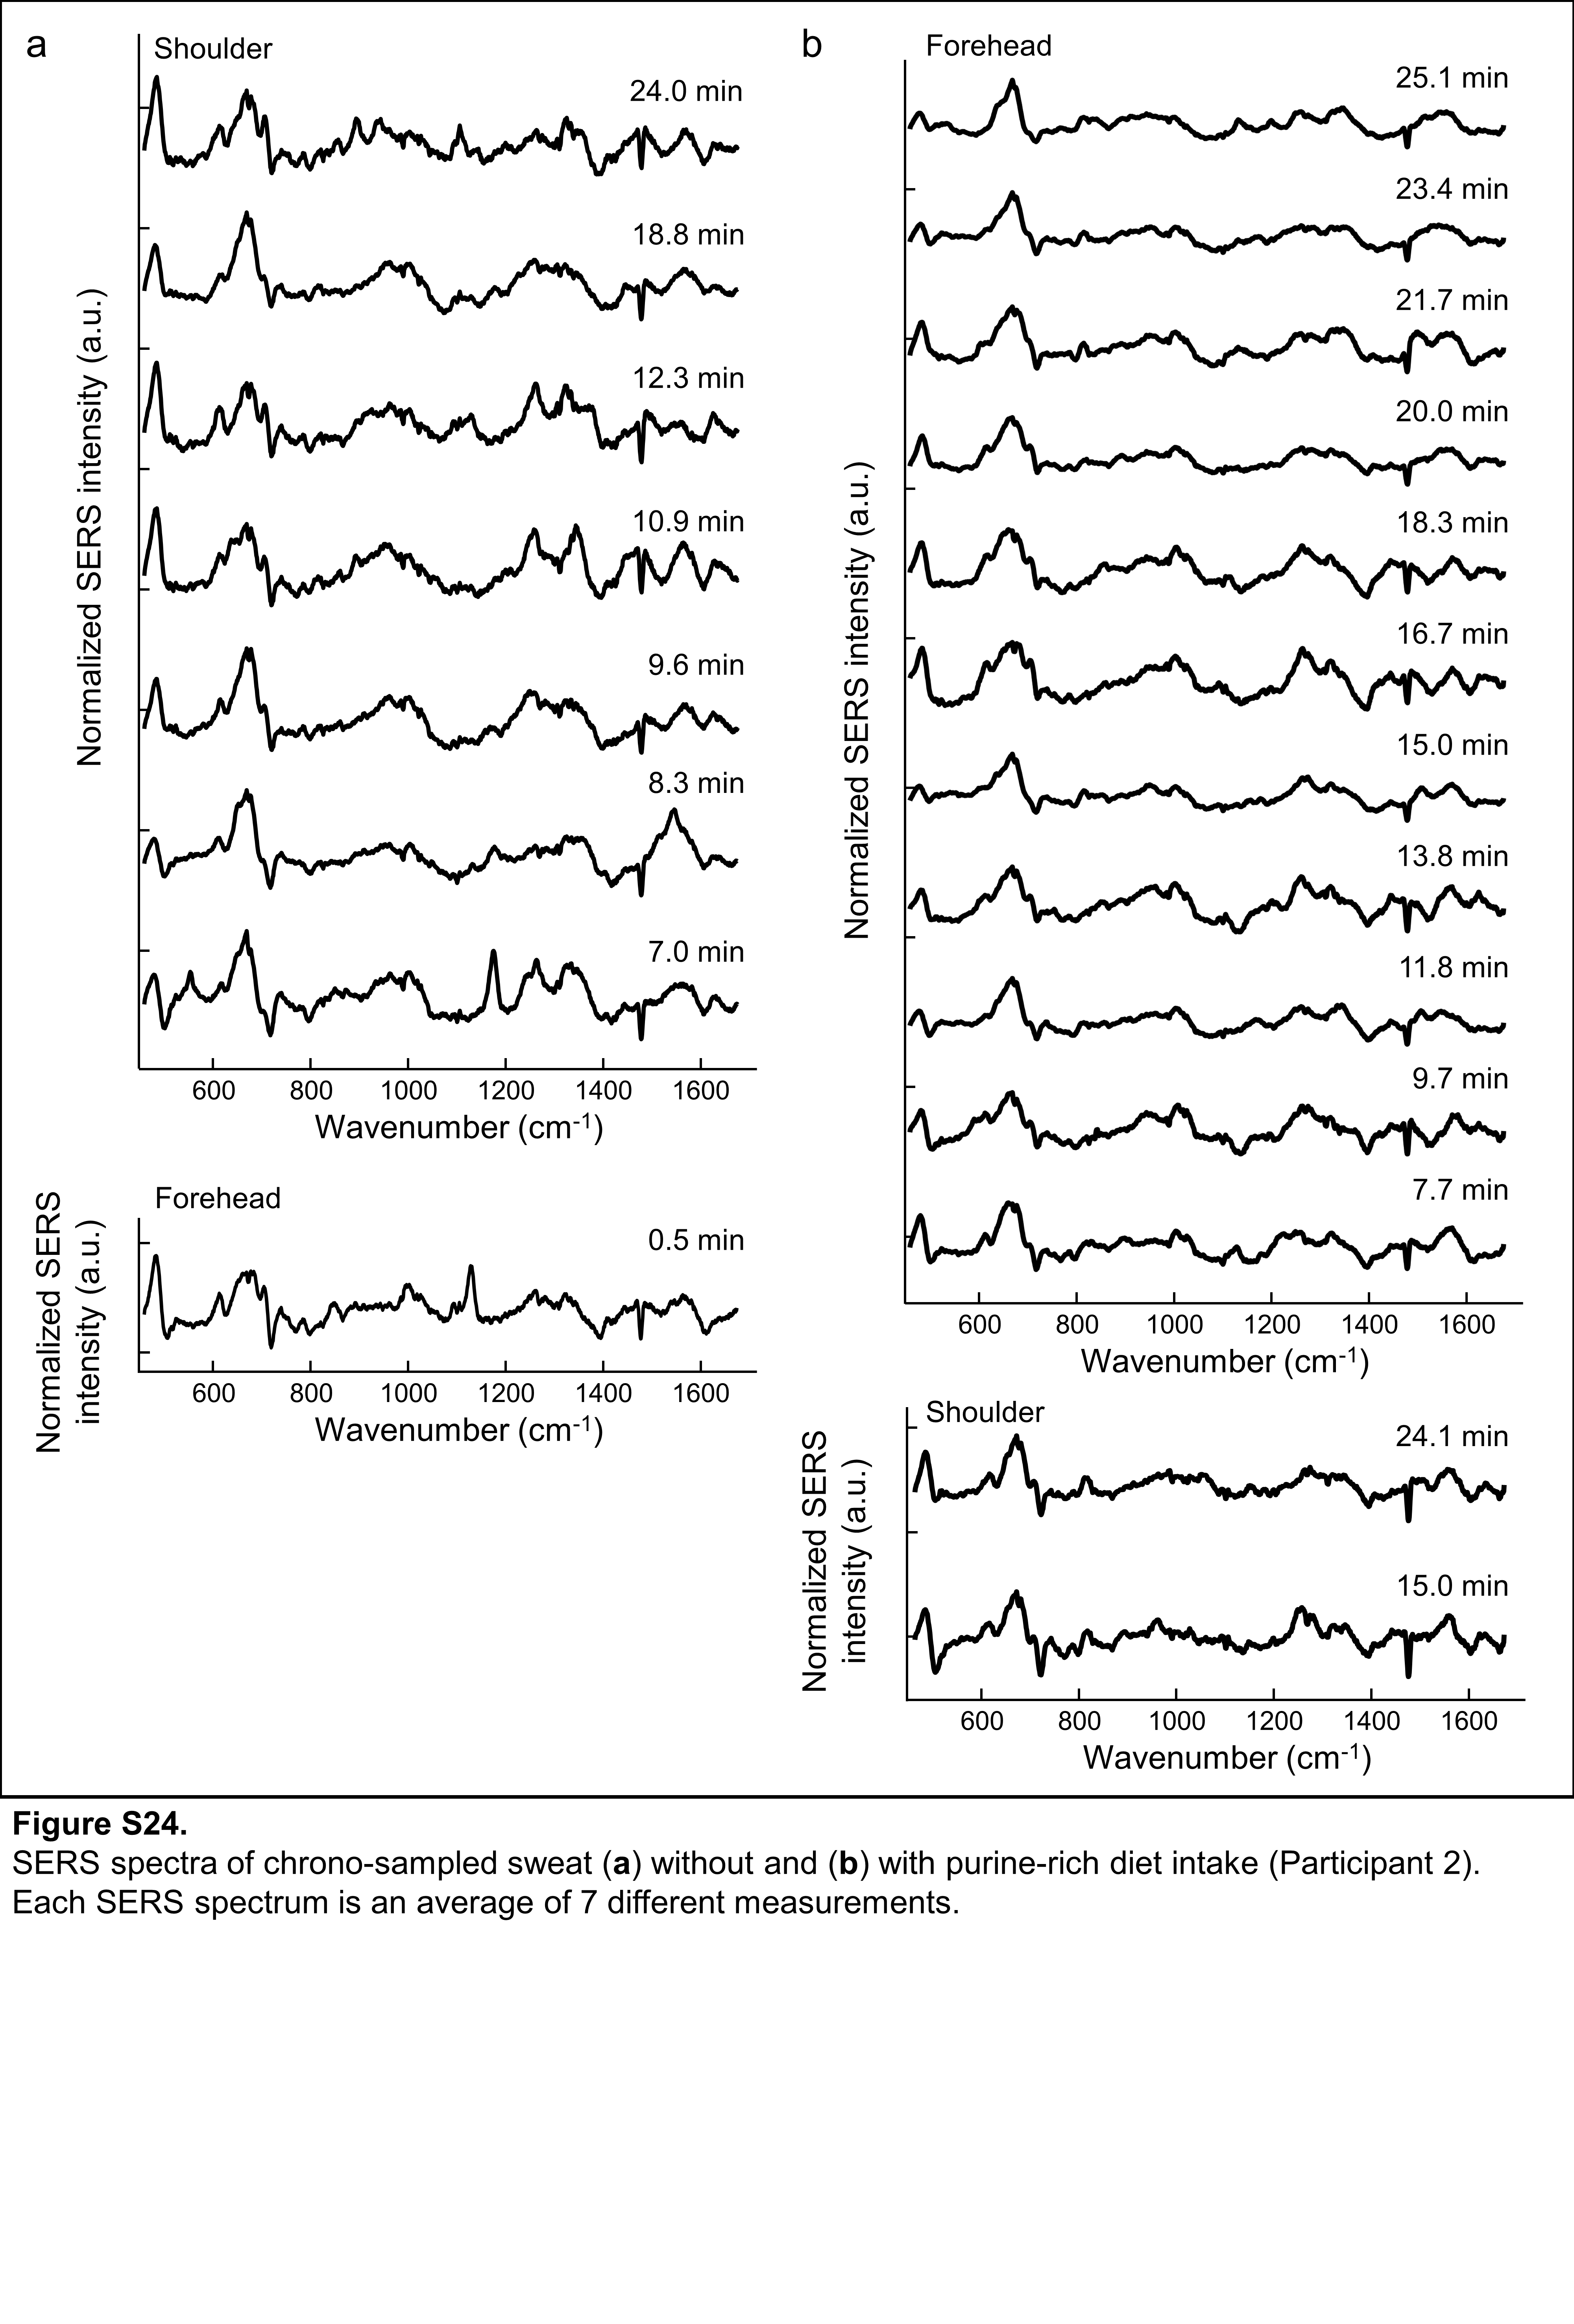


**Figure S26.** SERS spectra of chrono-sampled sweat under (**a**) fasting condition and (**b**) purine-rich diet intake(Participant 2). Each SERS spectrum is an average of 7 different measurements.


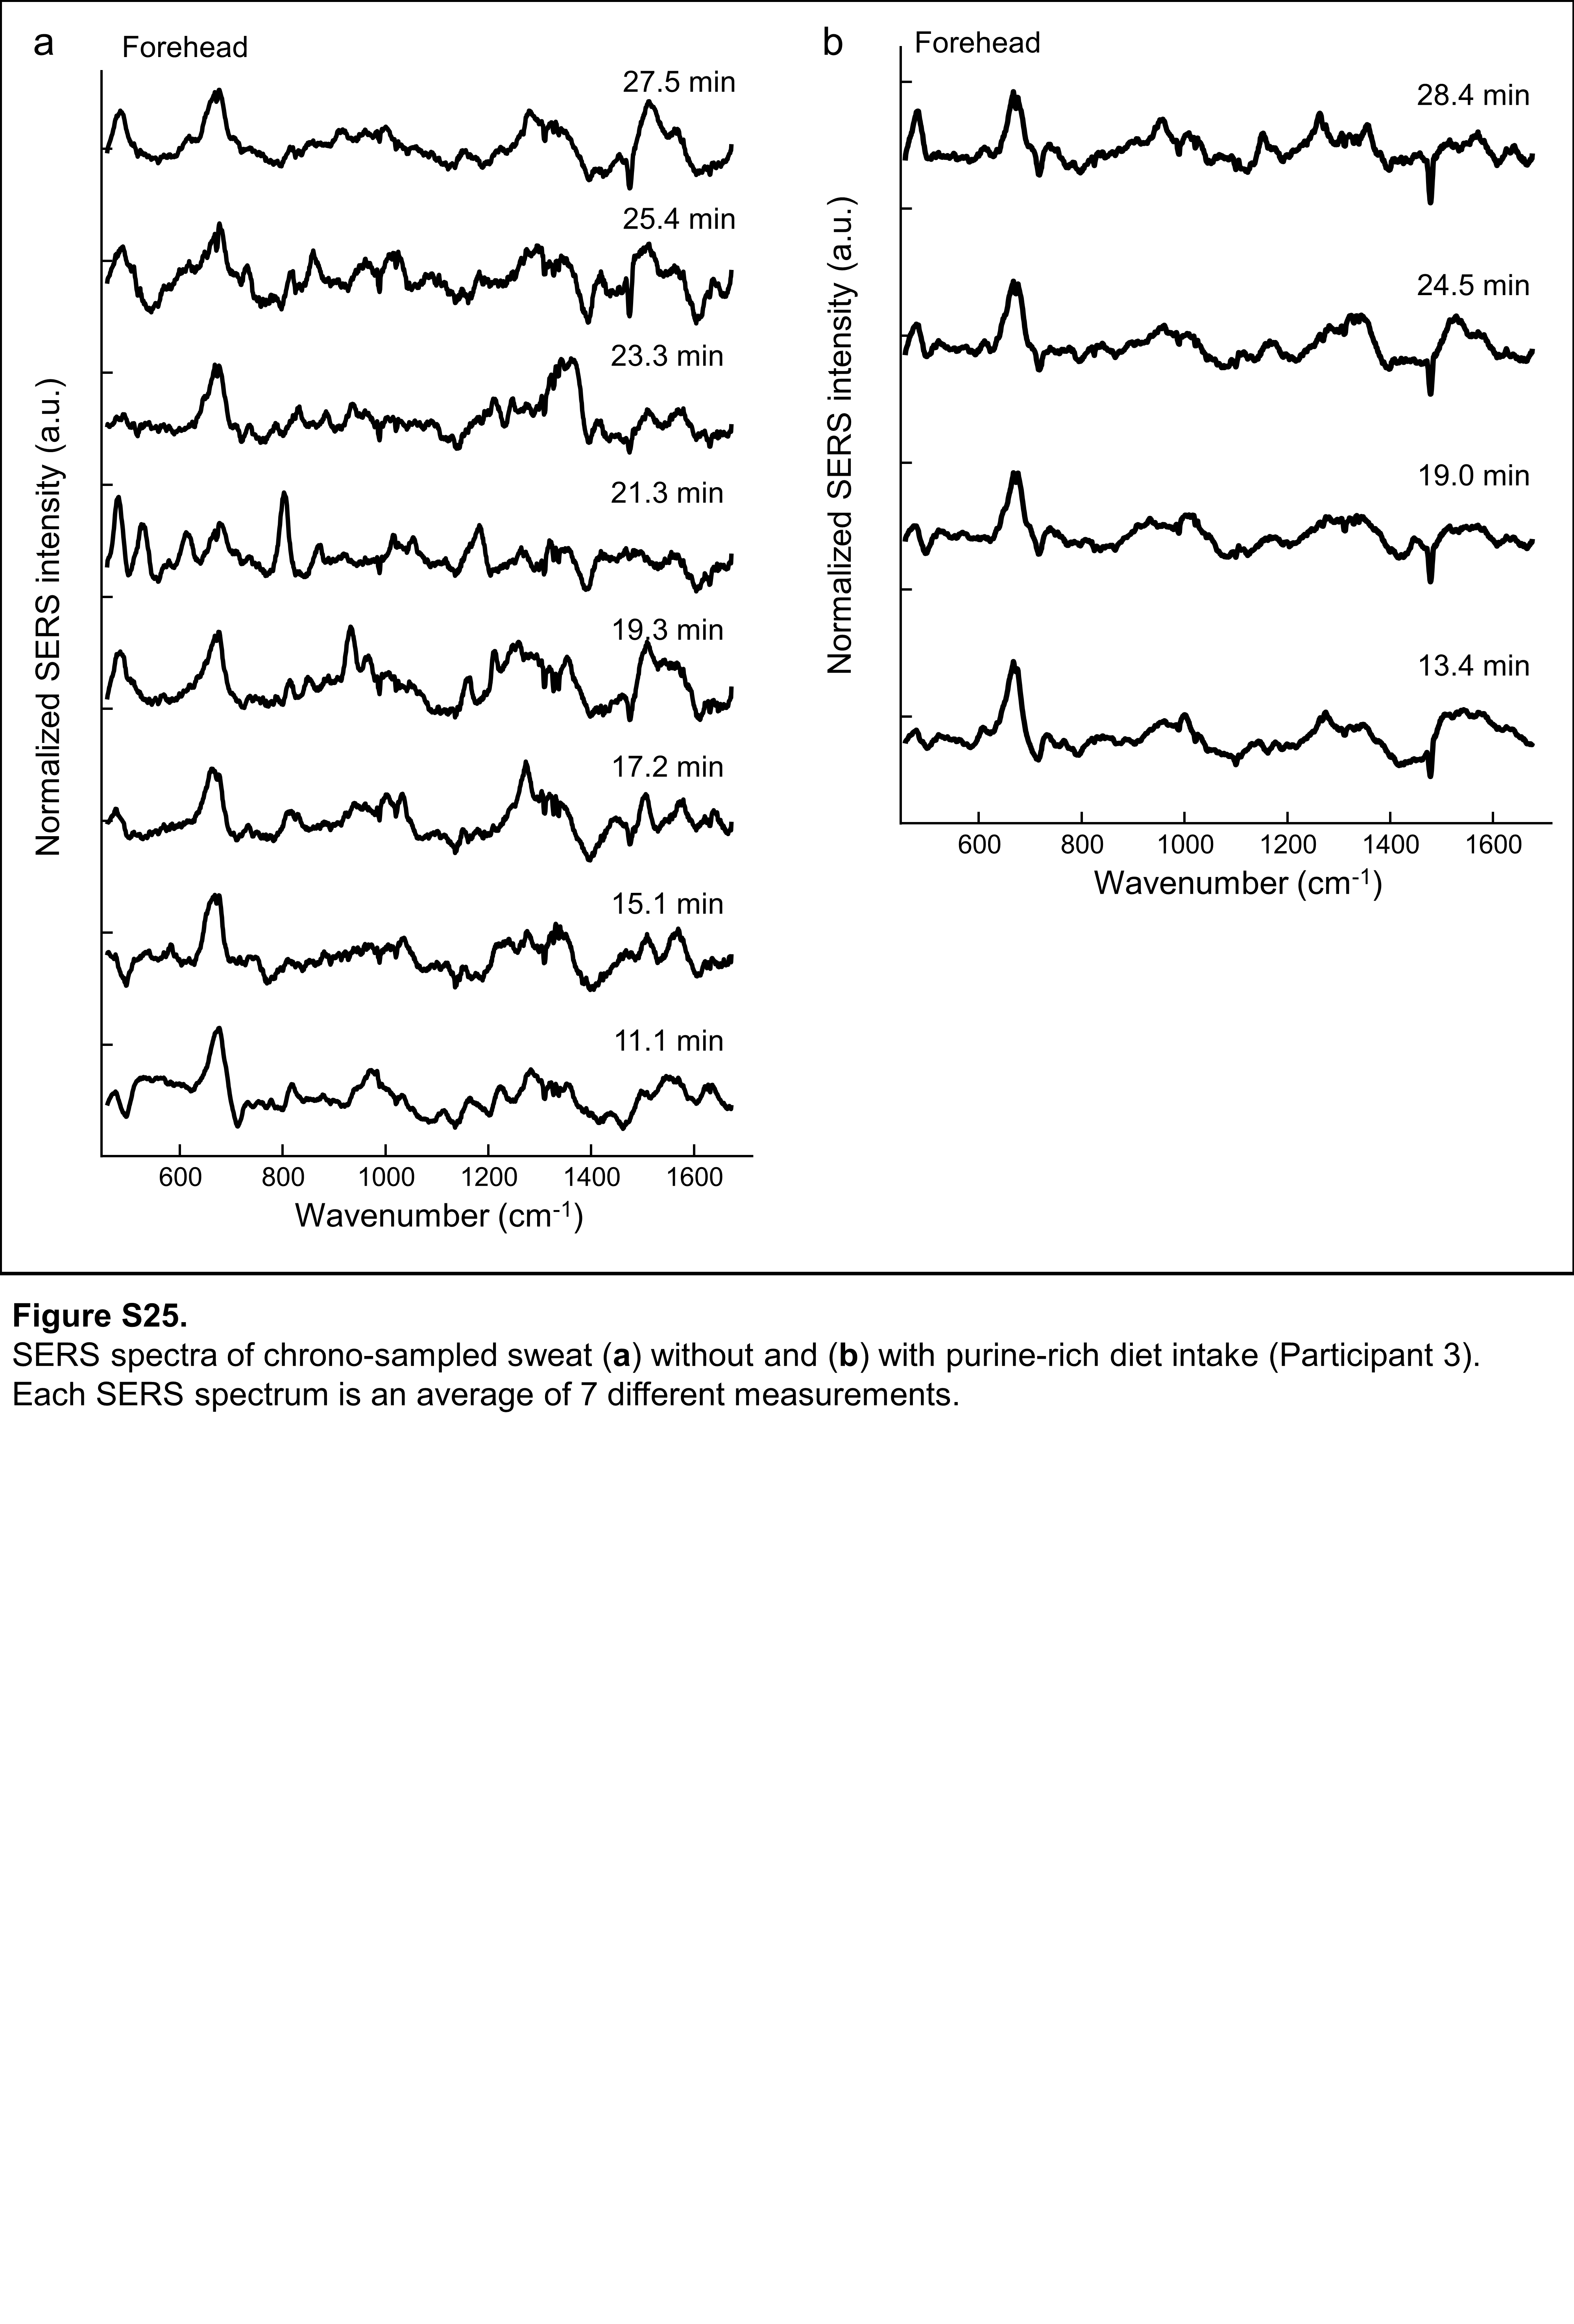


**Figure S27.** SERS spectra of chrono-sampled sweat under (**a**) fasting condition and (**b**) purine-rich diet intake (Participant 3). Each SERS spectrum is an average of 7 different measurements.


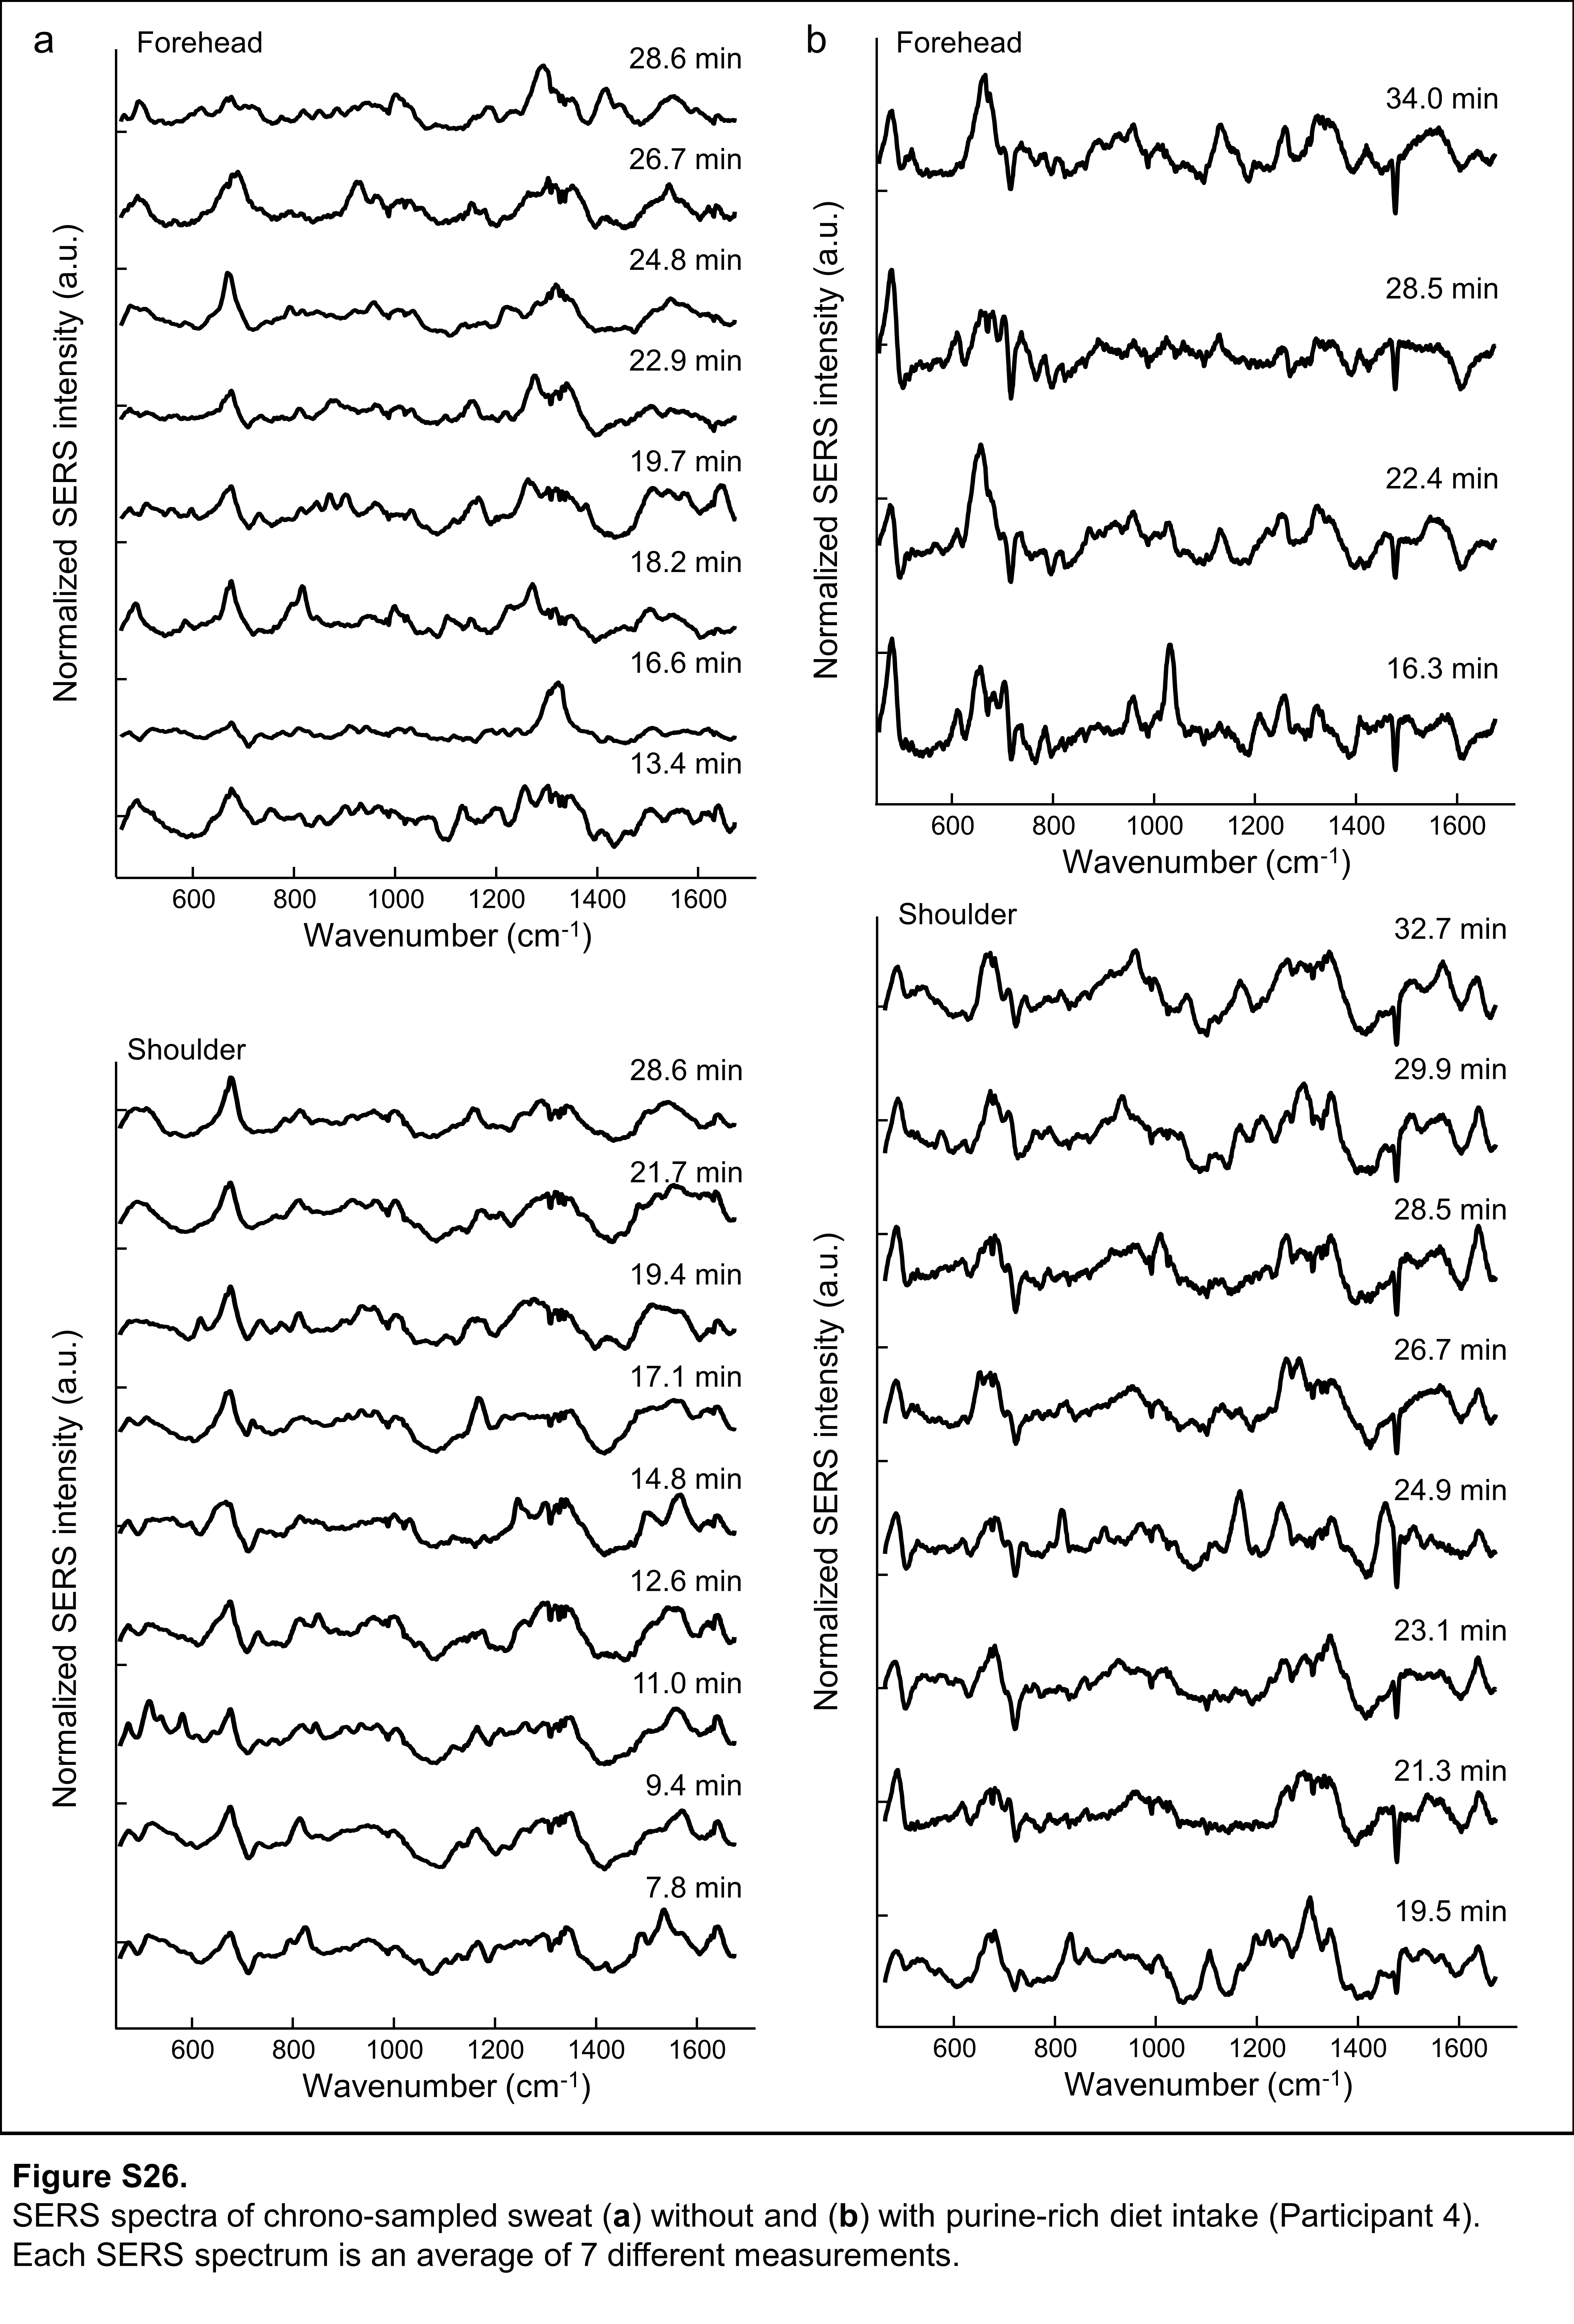


**Figure S28.** SERS spectra of chrono-sampled sweat under (**a**) fasting condition and (**b**) purine-rich diet intake (Participant 4). Each SERS spectrum is an average of 7 different measurements.


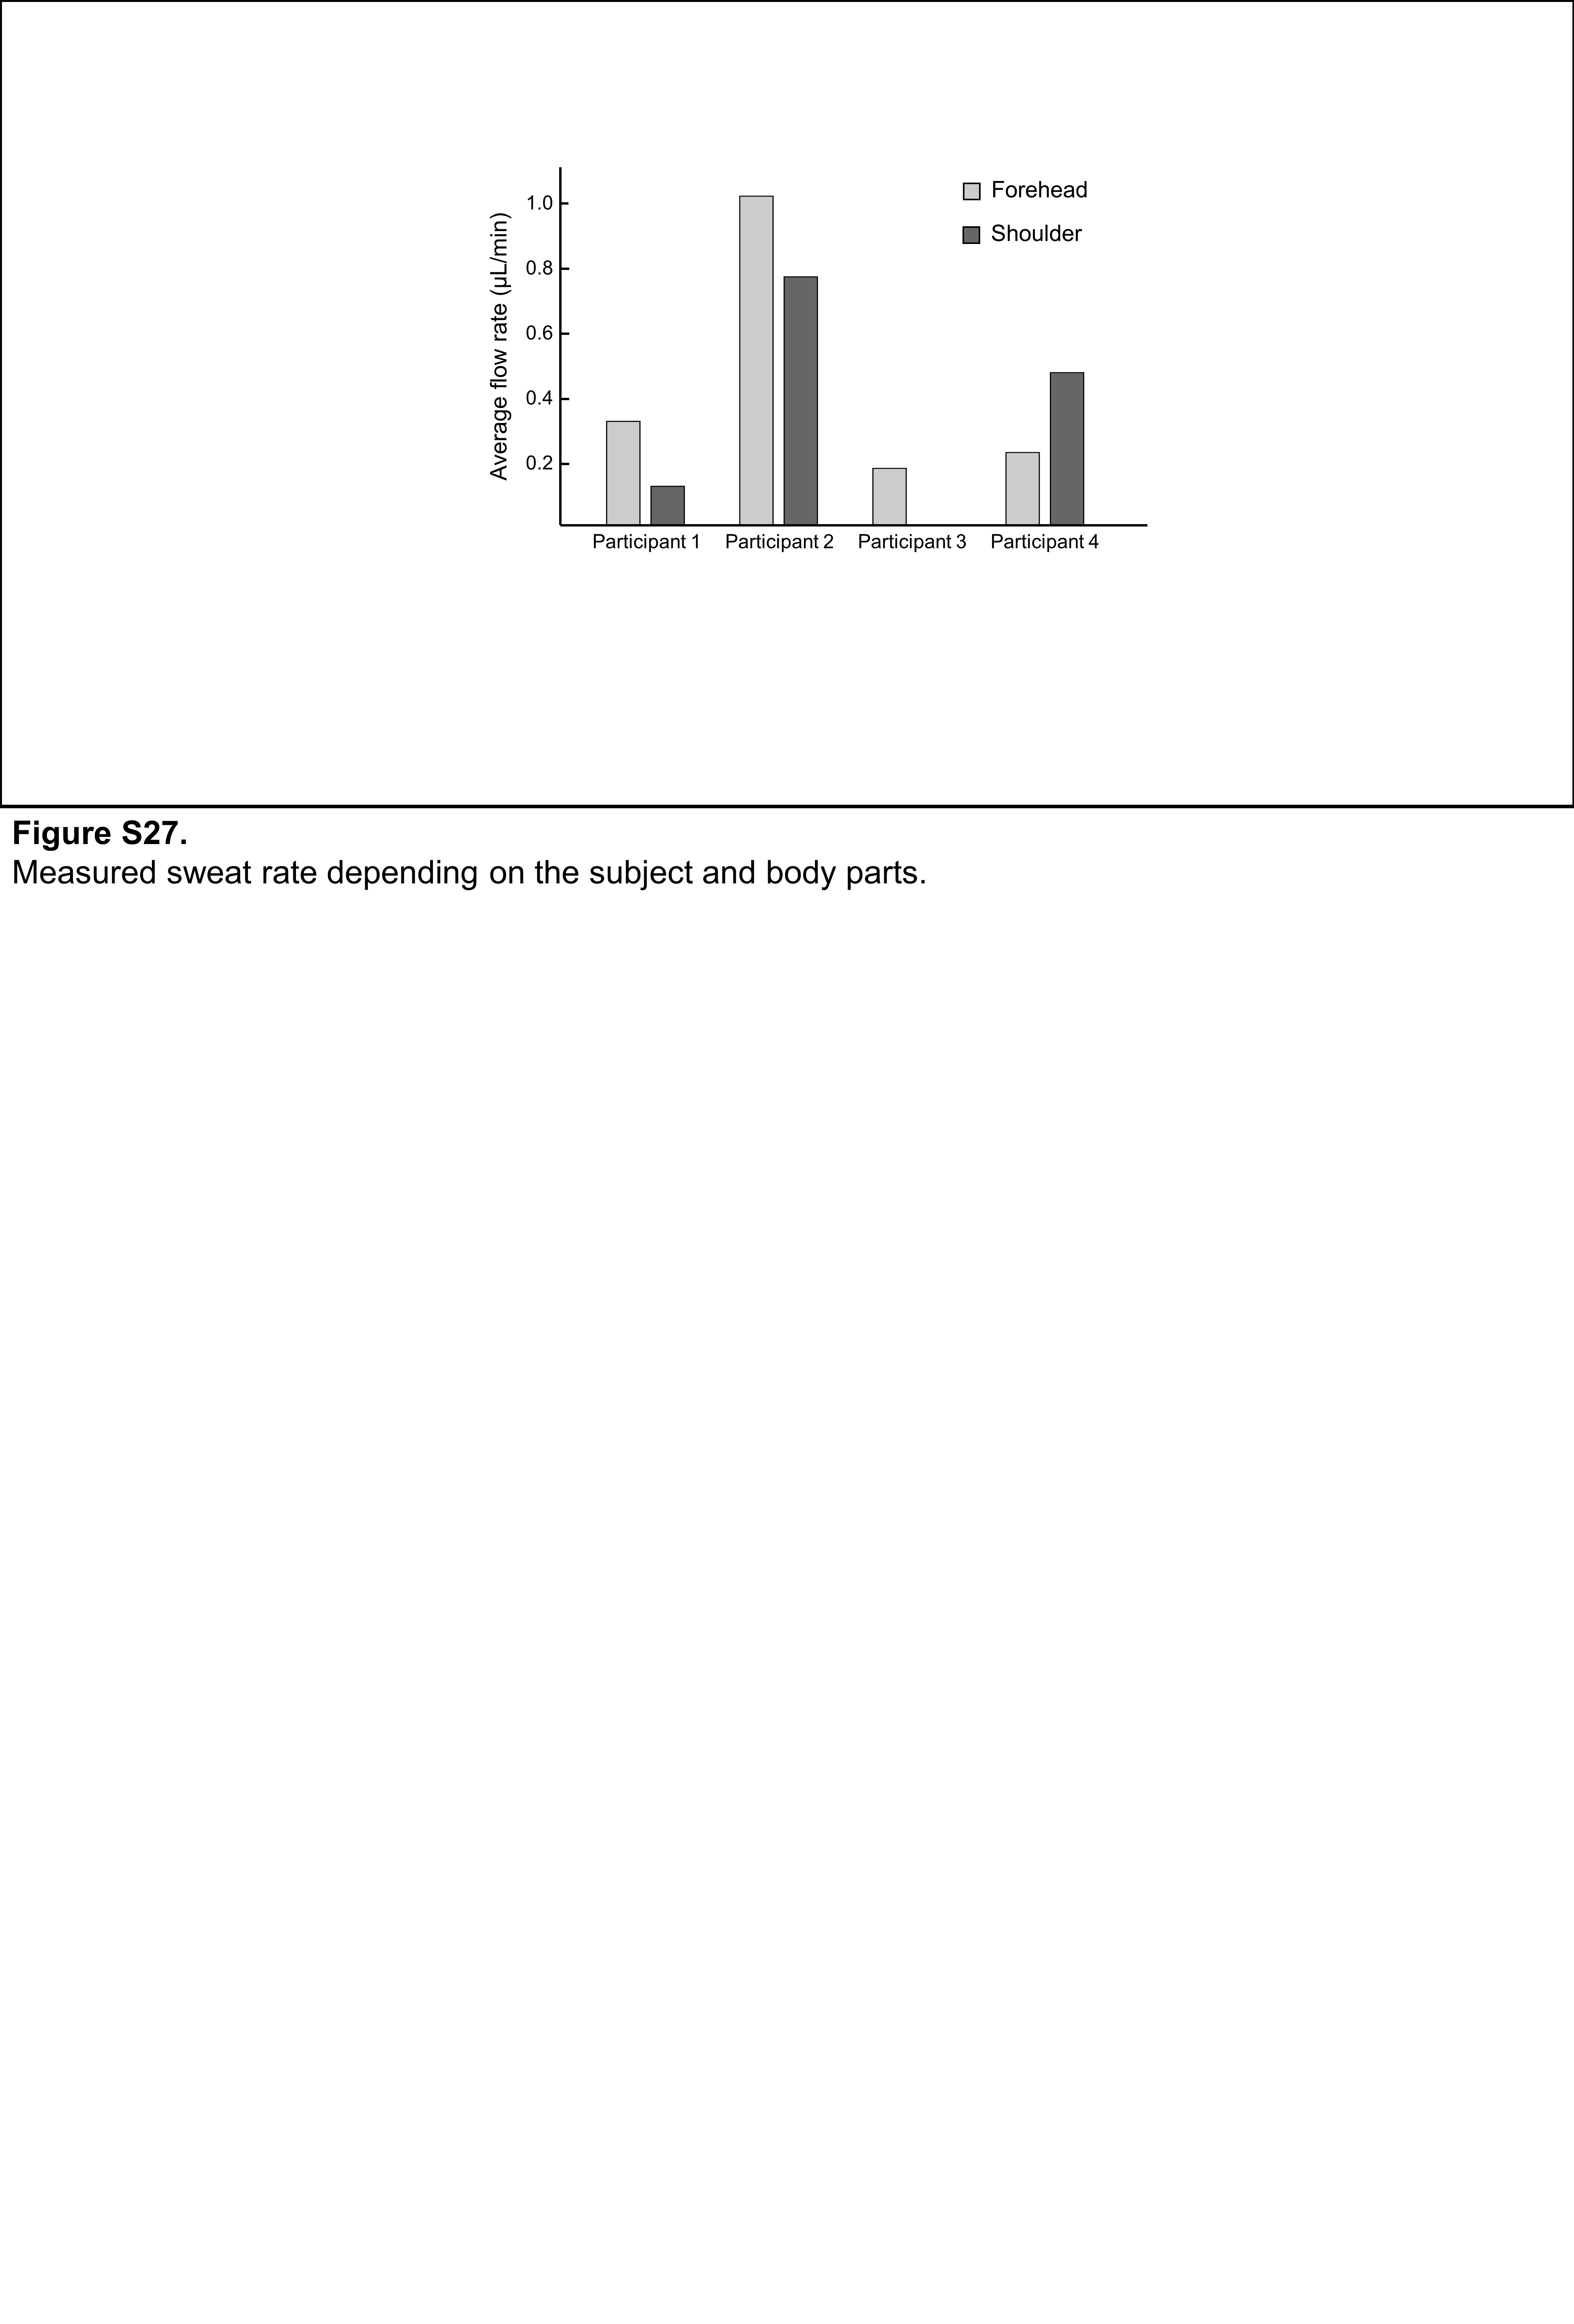


**Figure S29.** Measured sweat rate depends on the participants and body parts.


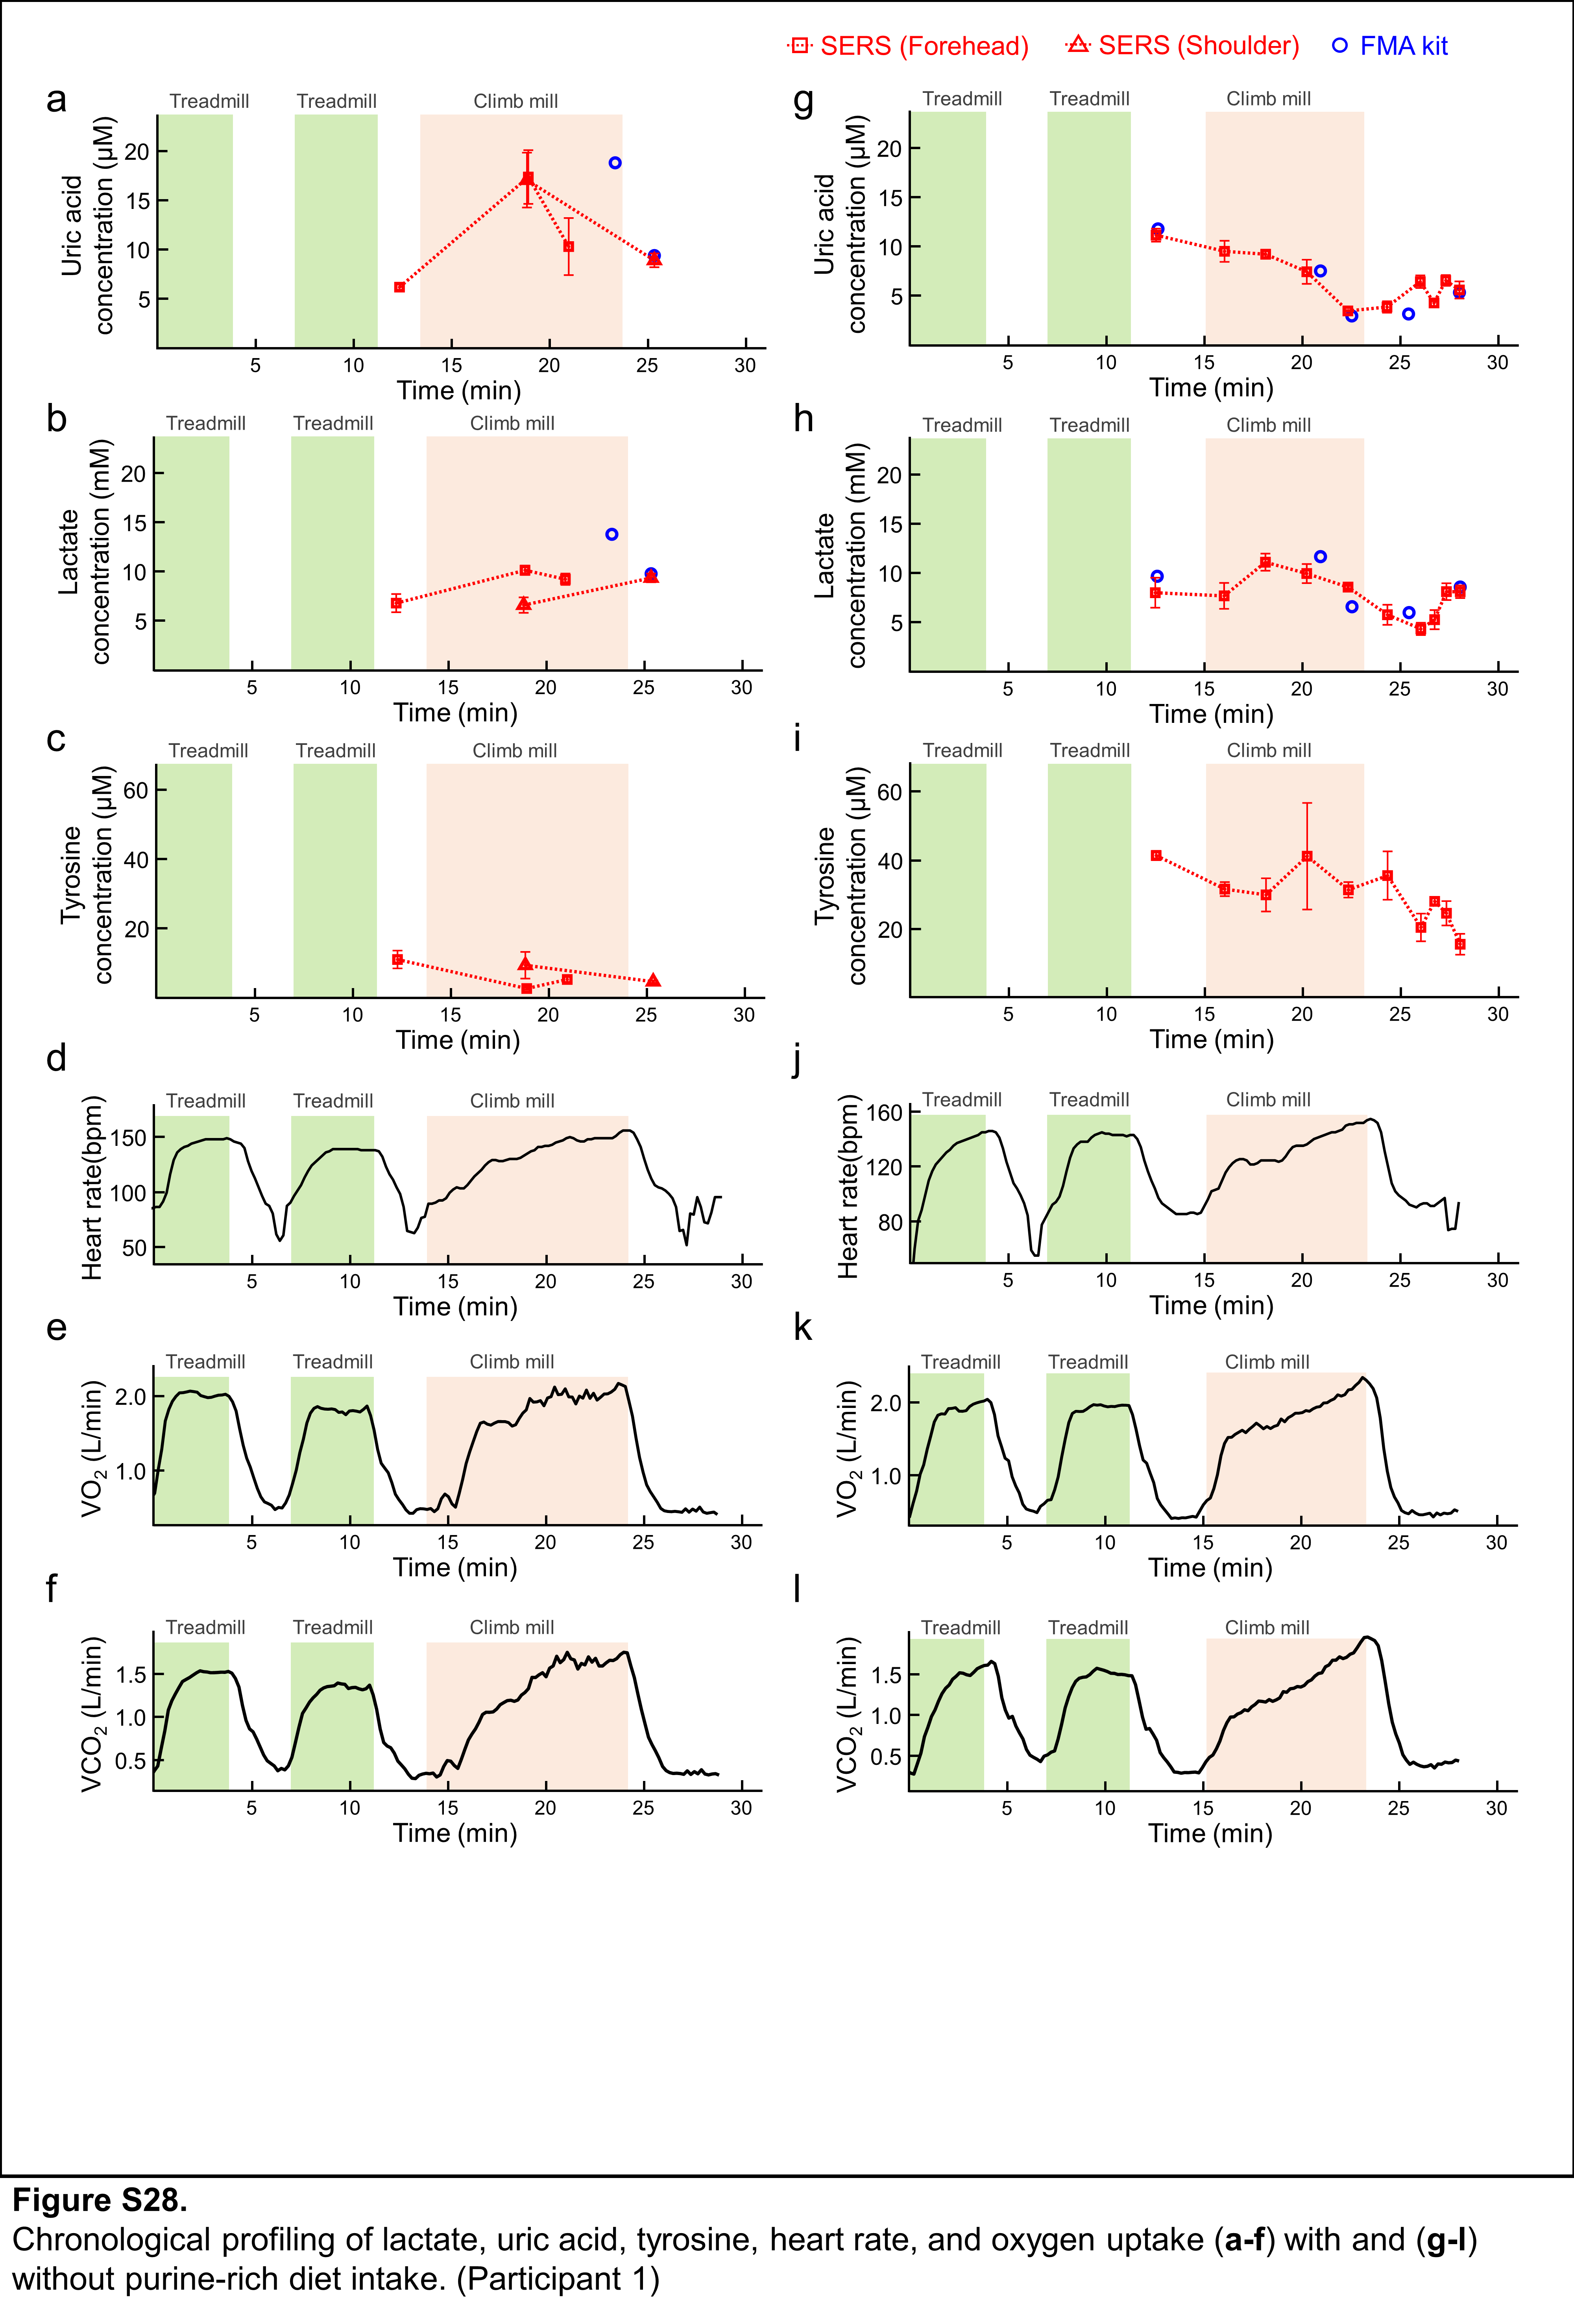


**Figure S30.** Chronological profiling of lactate, uric acid, tyrosine, heart rate, oxygen (VO2), and carbon dioxide (VCO2) uptake under (**a**-**f**) fasting condition and (**g**-**l**) purine-rich diet intake (Participant 1). The error bars represent one standard deviation from the mean.


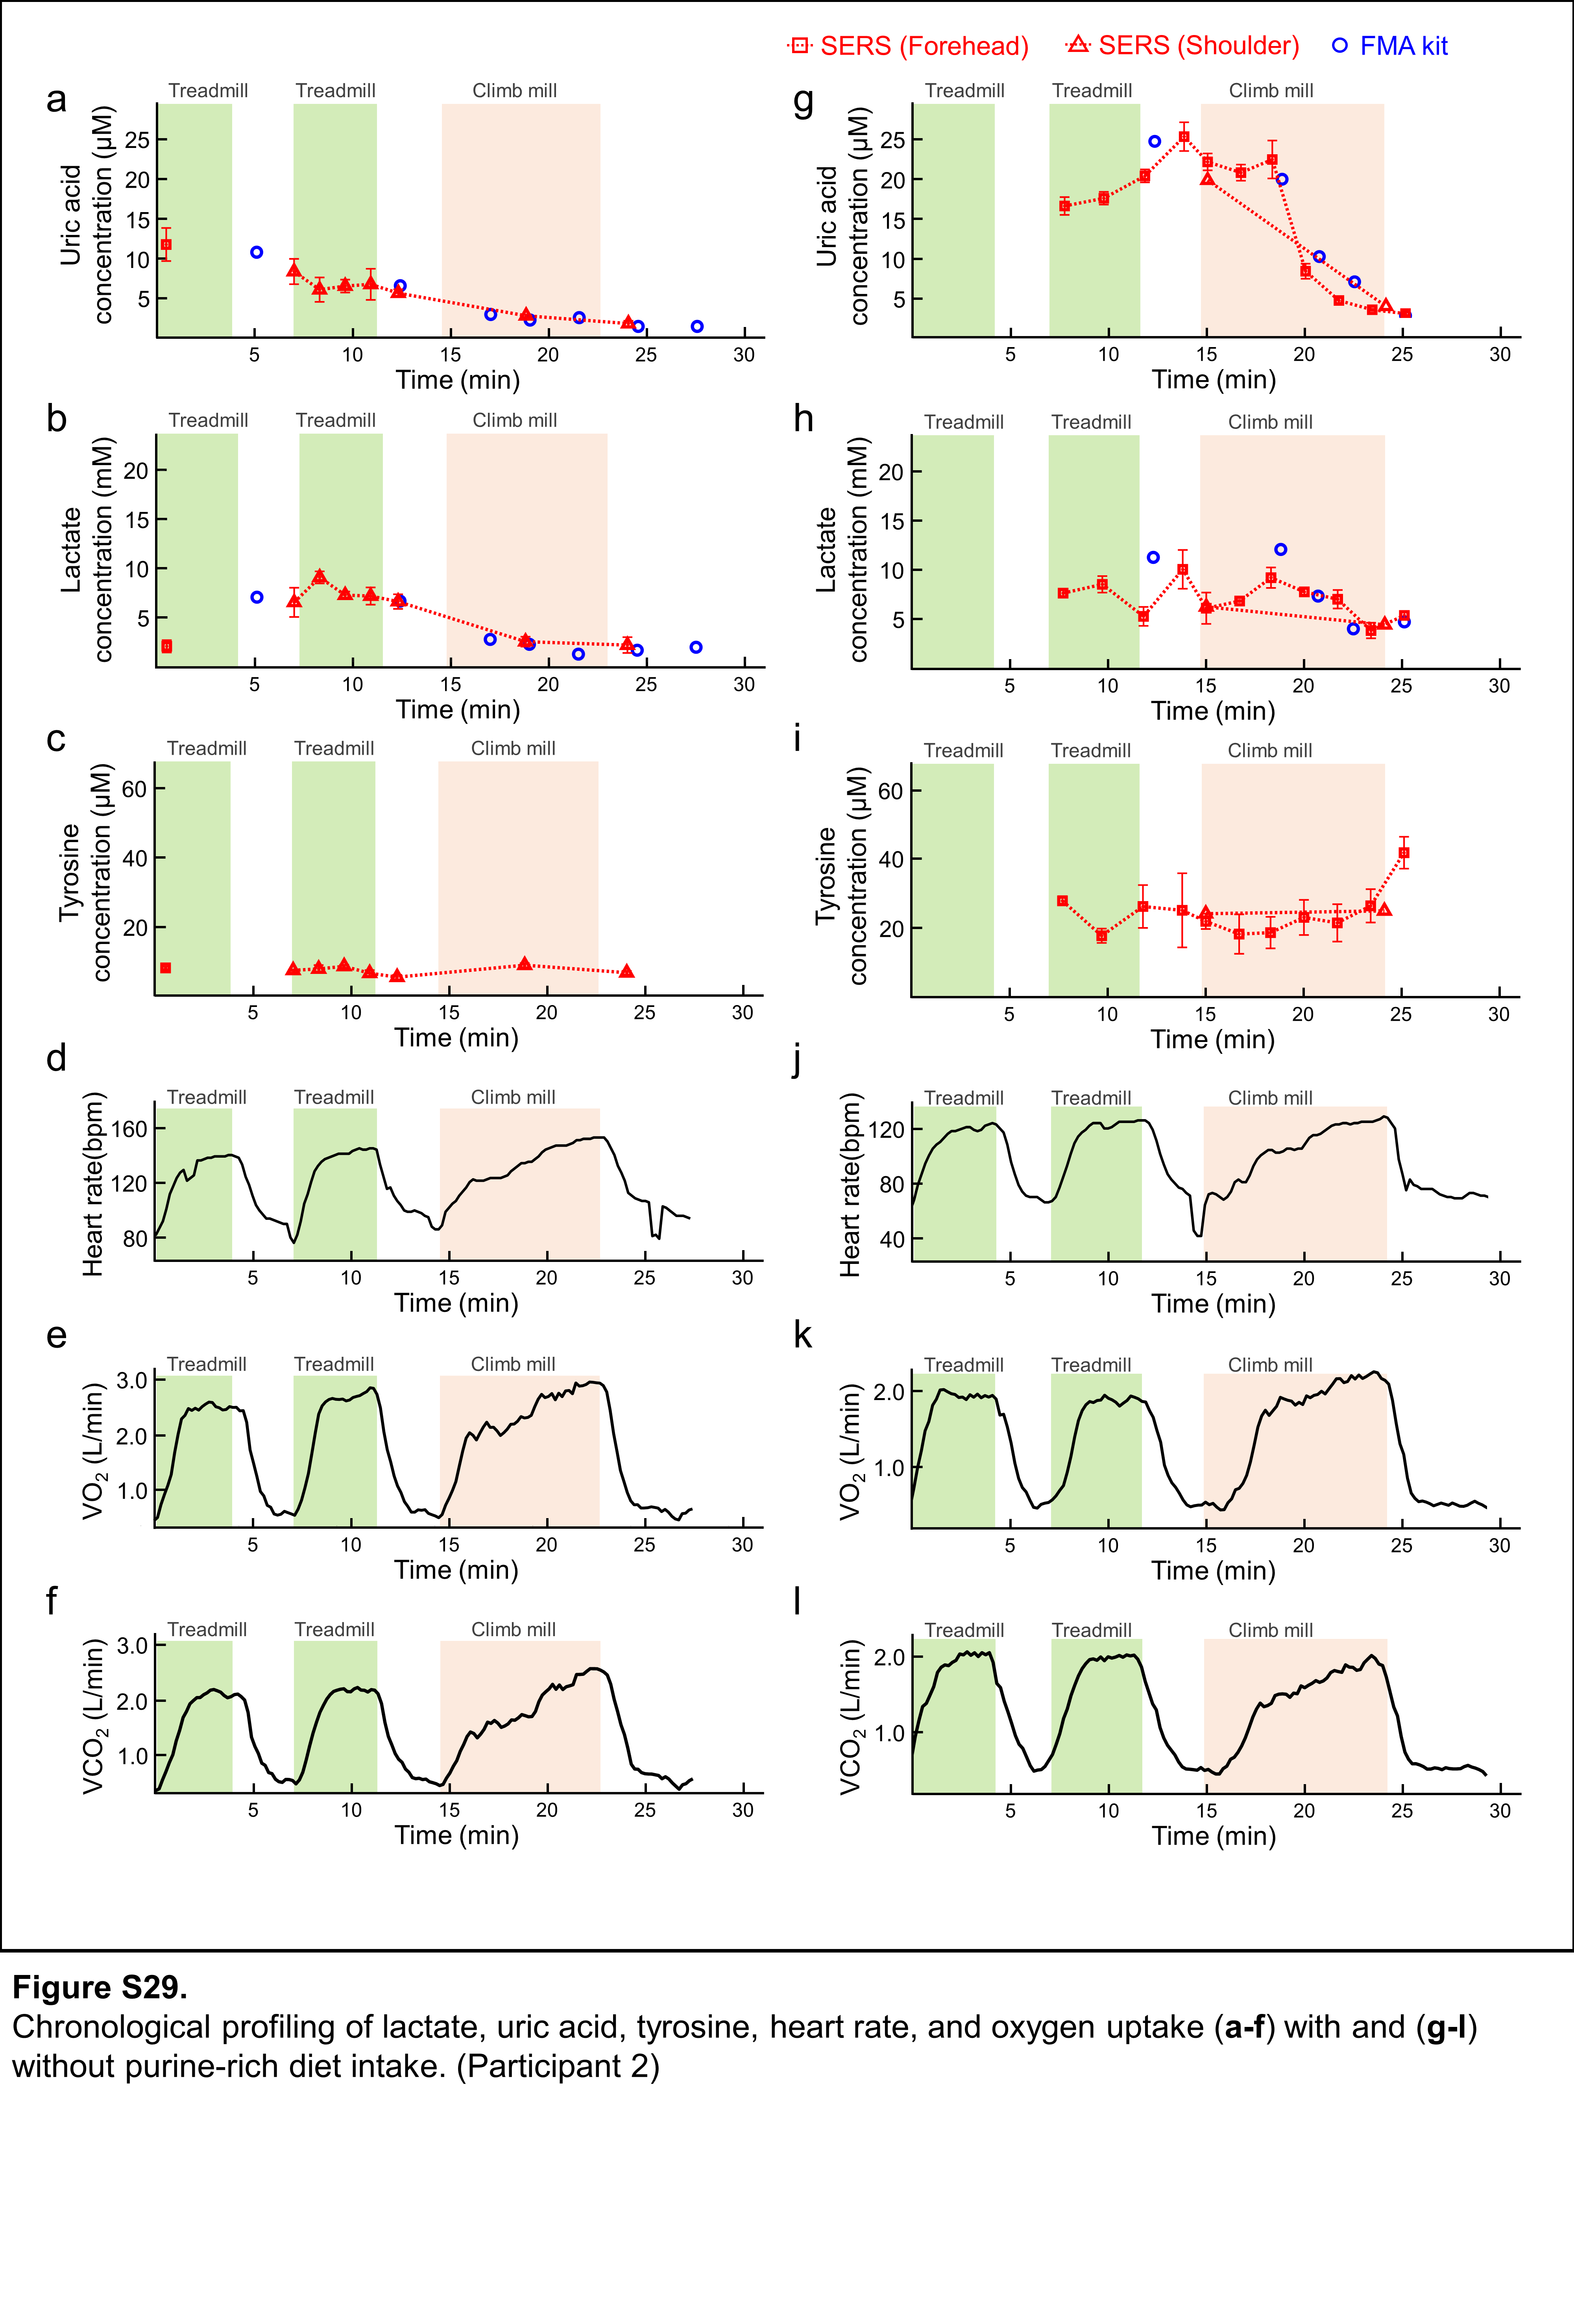


**Figure S31.** Chronological profiling of lactate, uric acid, tyrosine, heart rate, oxygen (VO2), and carbon dioxide (VCO2) uptake under (**a**-**f**) fasting condition and (**g**-**l**) purine-rich diet intake (Participant 2). The error bars represent one standard deviation from the mean.


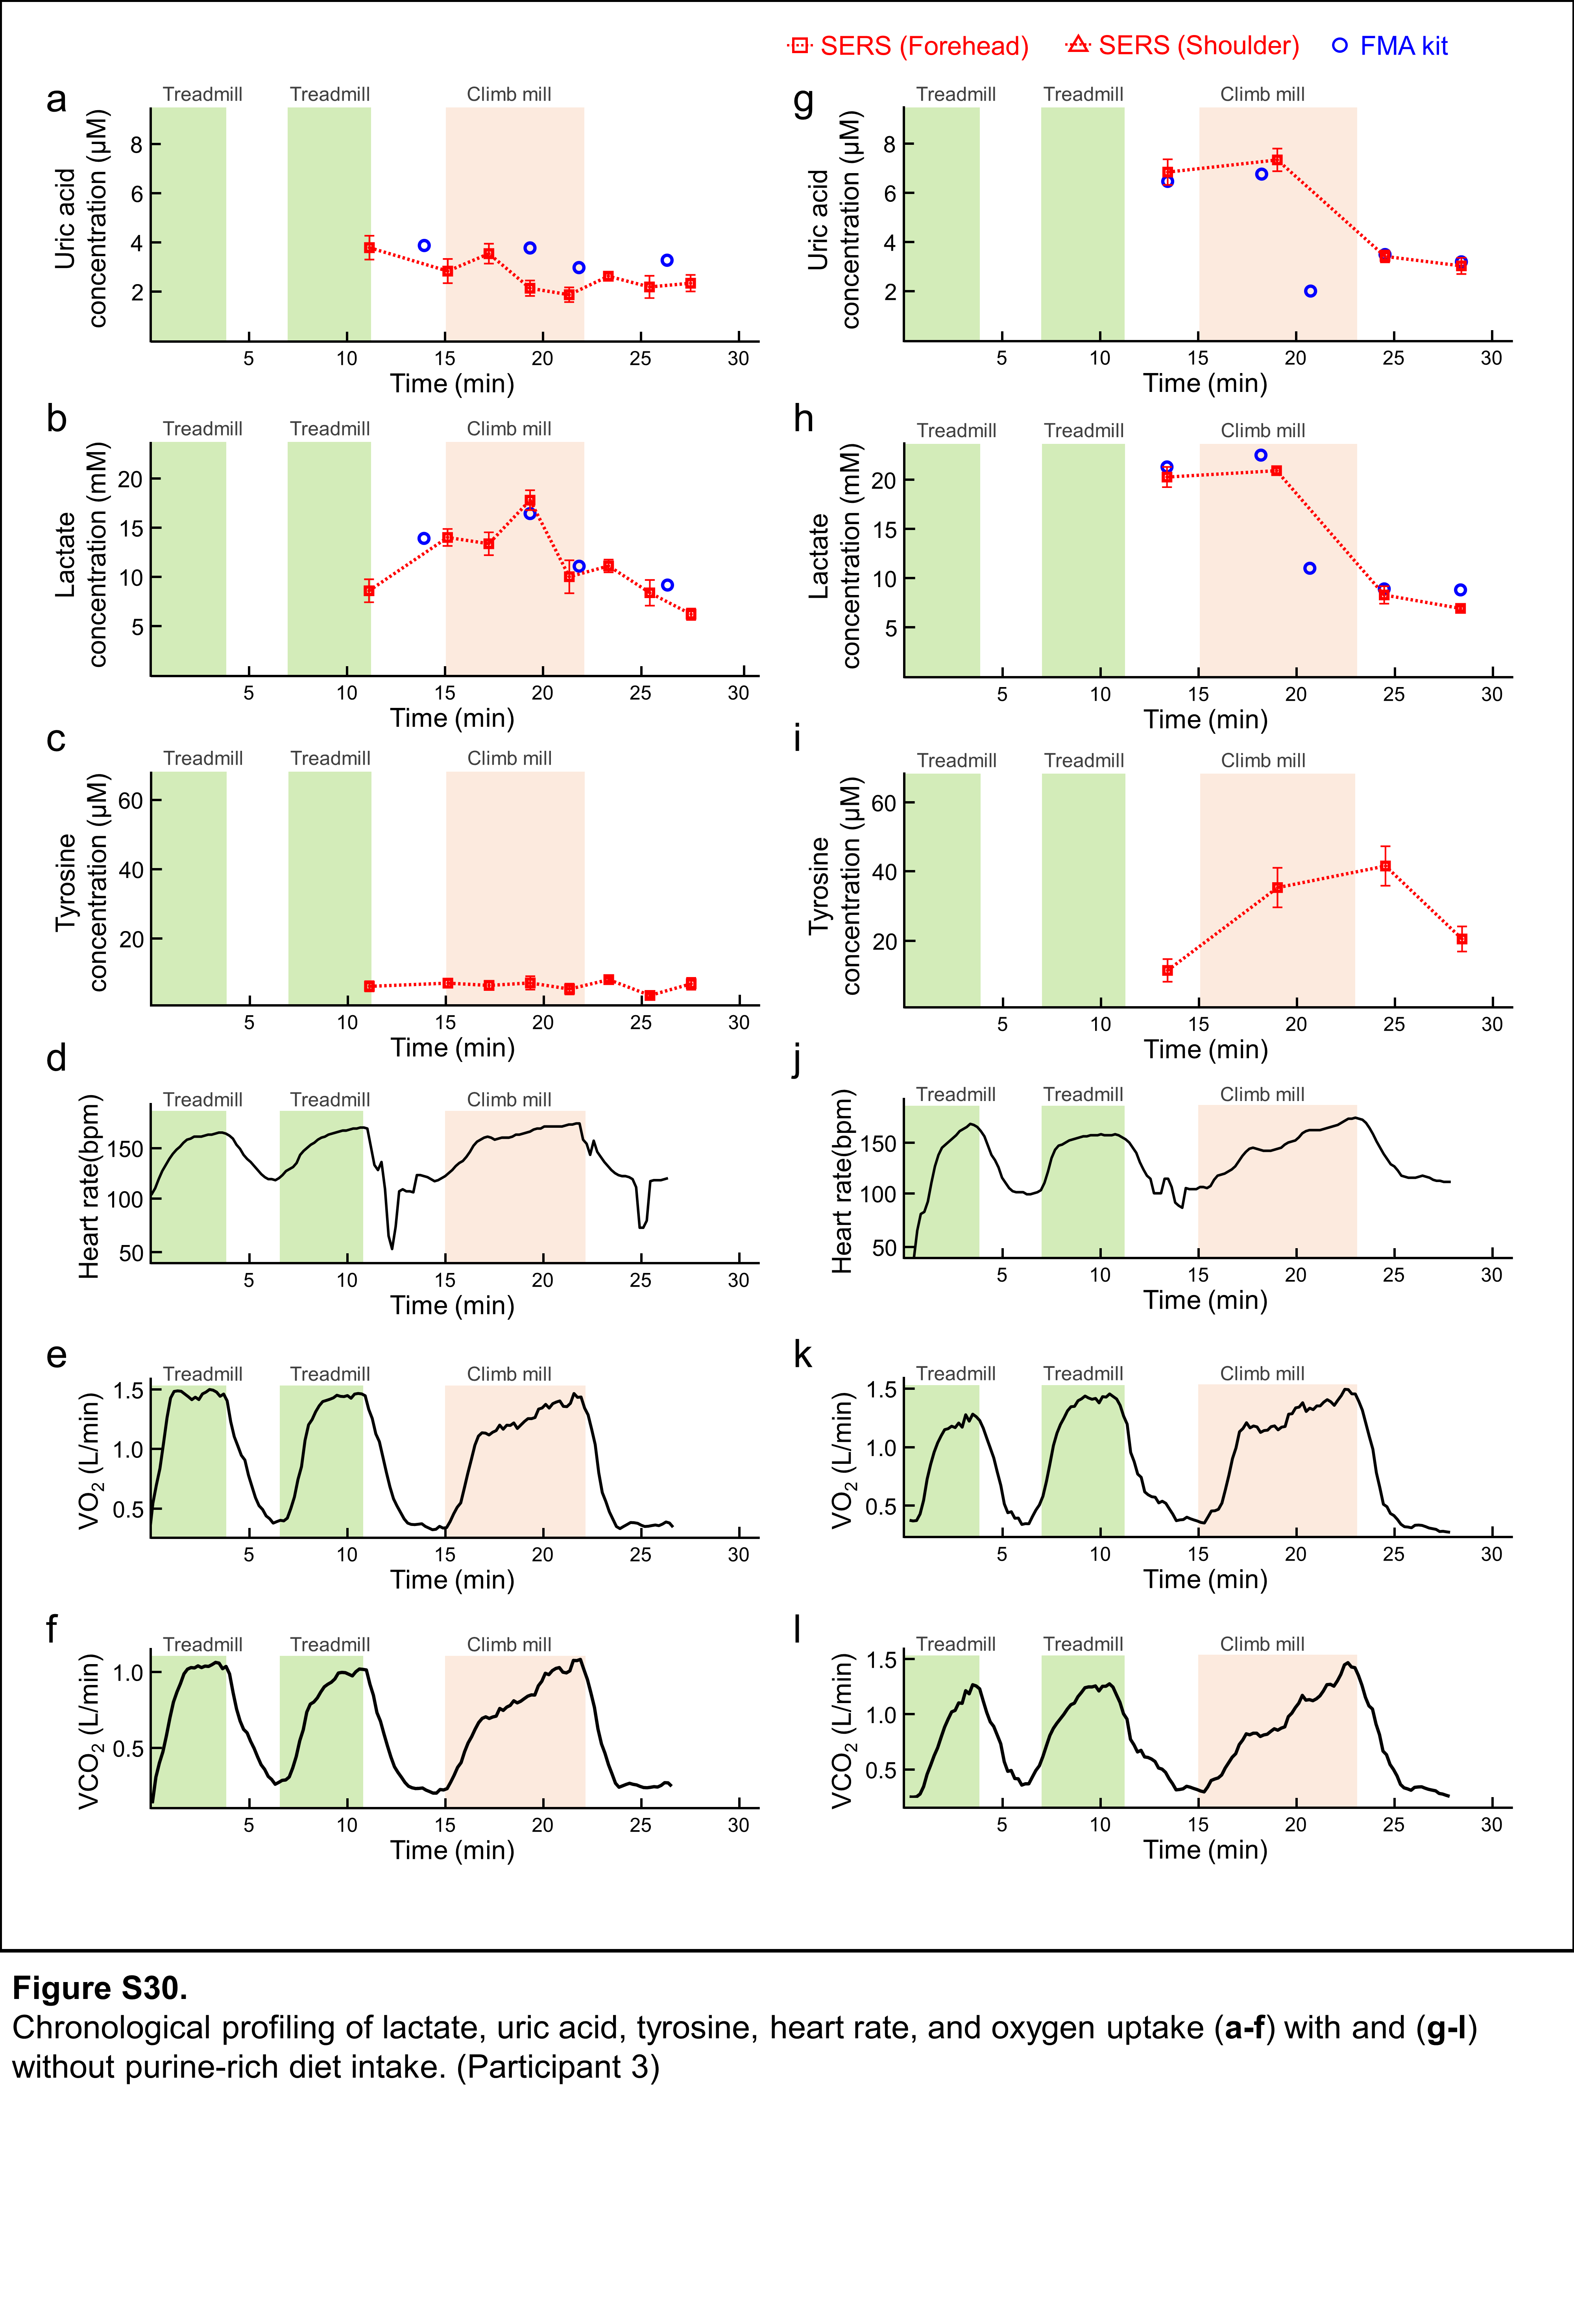


**Figure S32.** Chronological profiling of lactate, uric acid, tyrosine, heart rate, oxygen (VO2), and carbon dioxide (VCO2) uptake under (**a**-**f**) fasting condition and (**g**-**l**) purine-rich diet intake (Participant 3). The error bars represent one standard deviation from the mean.


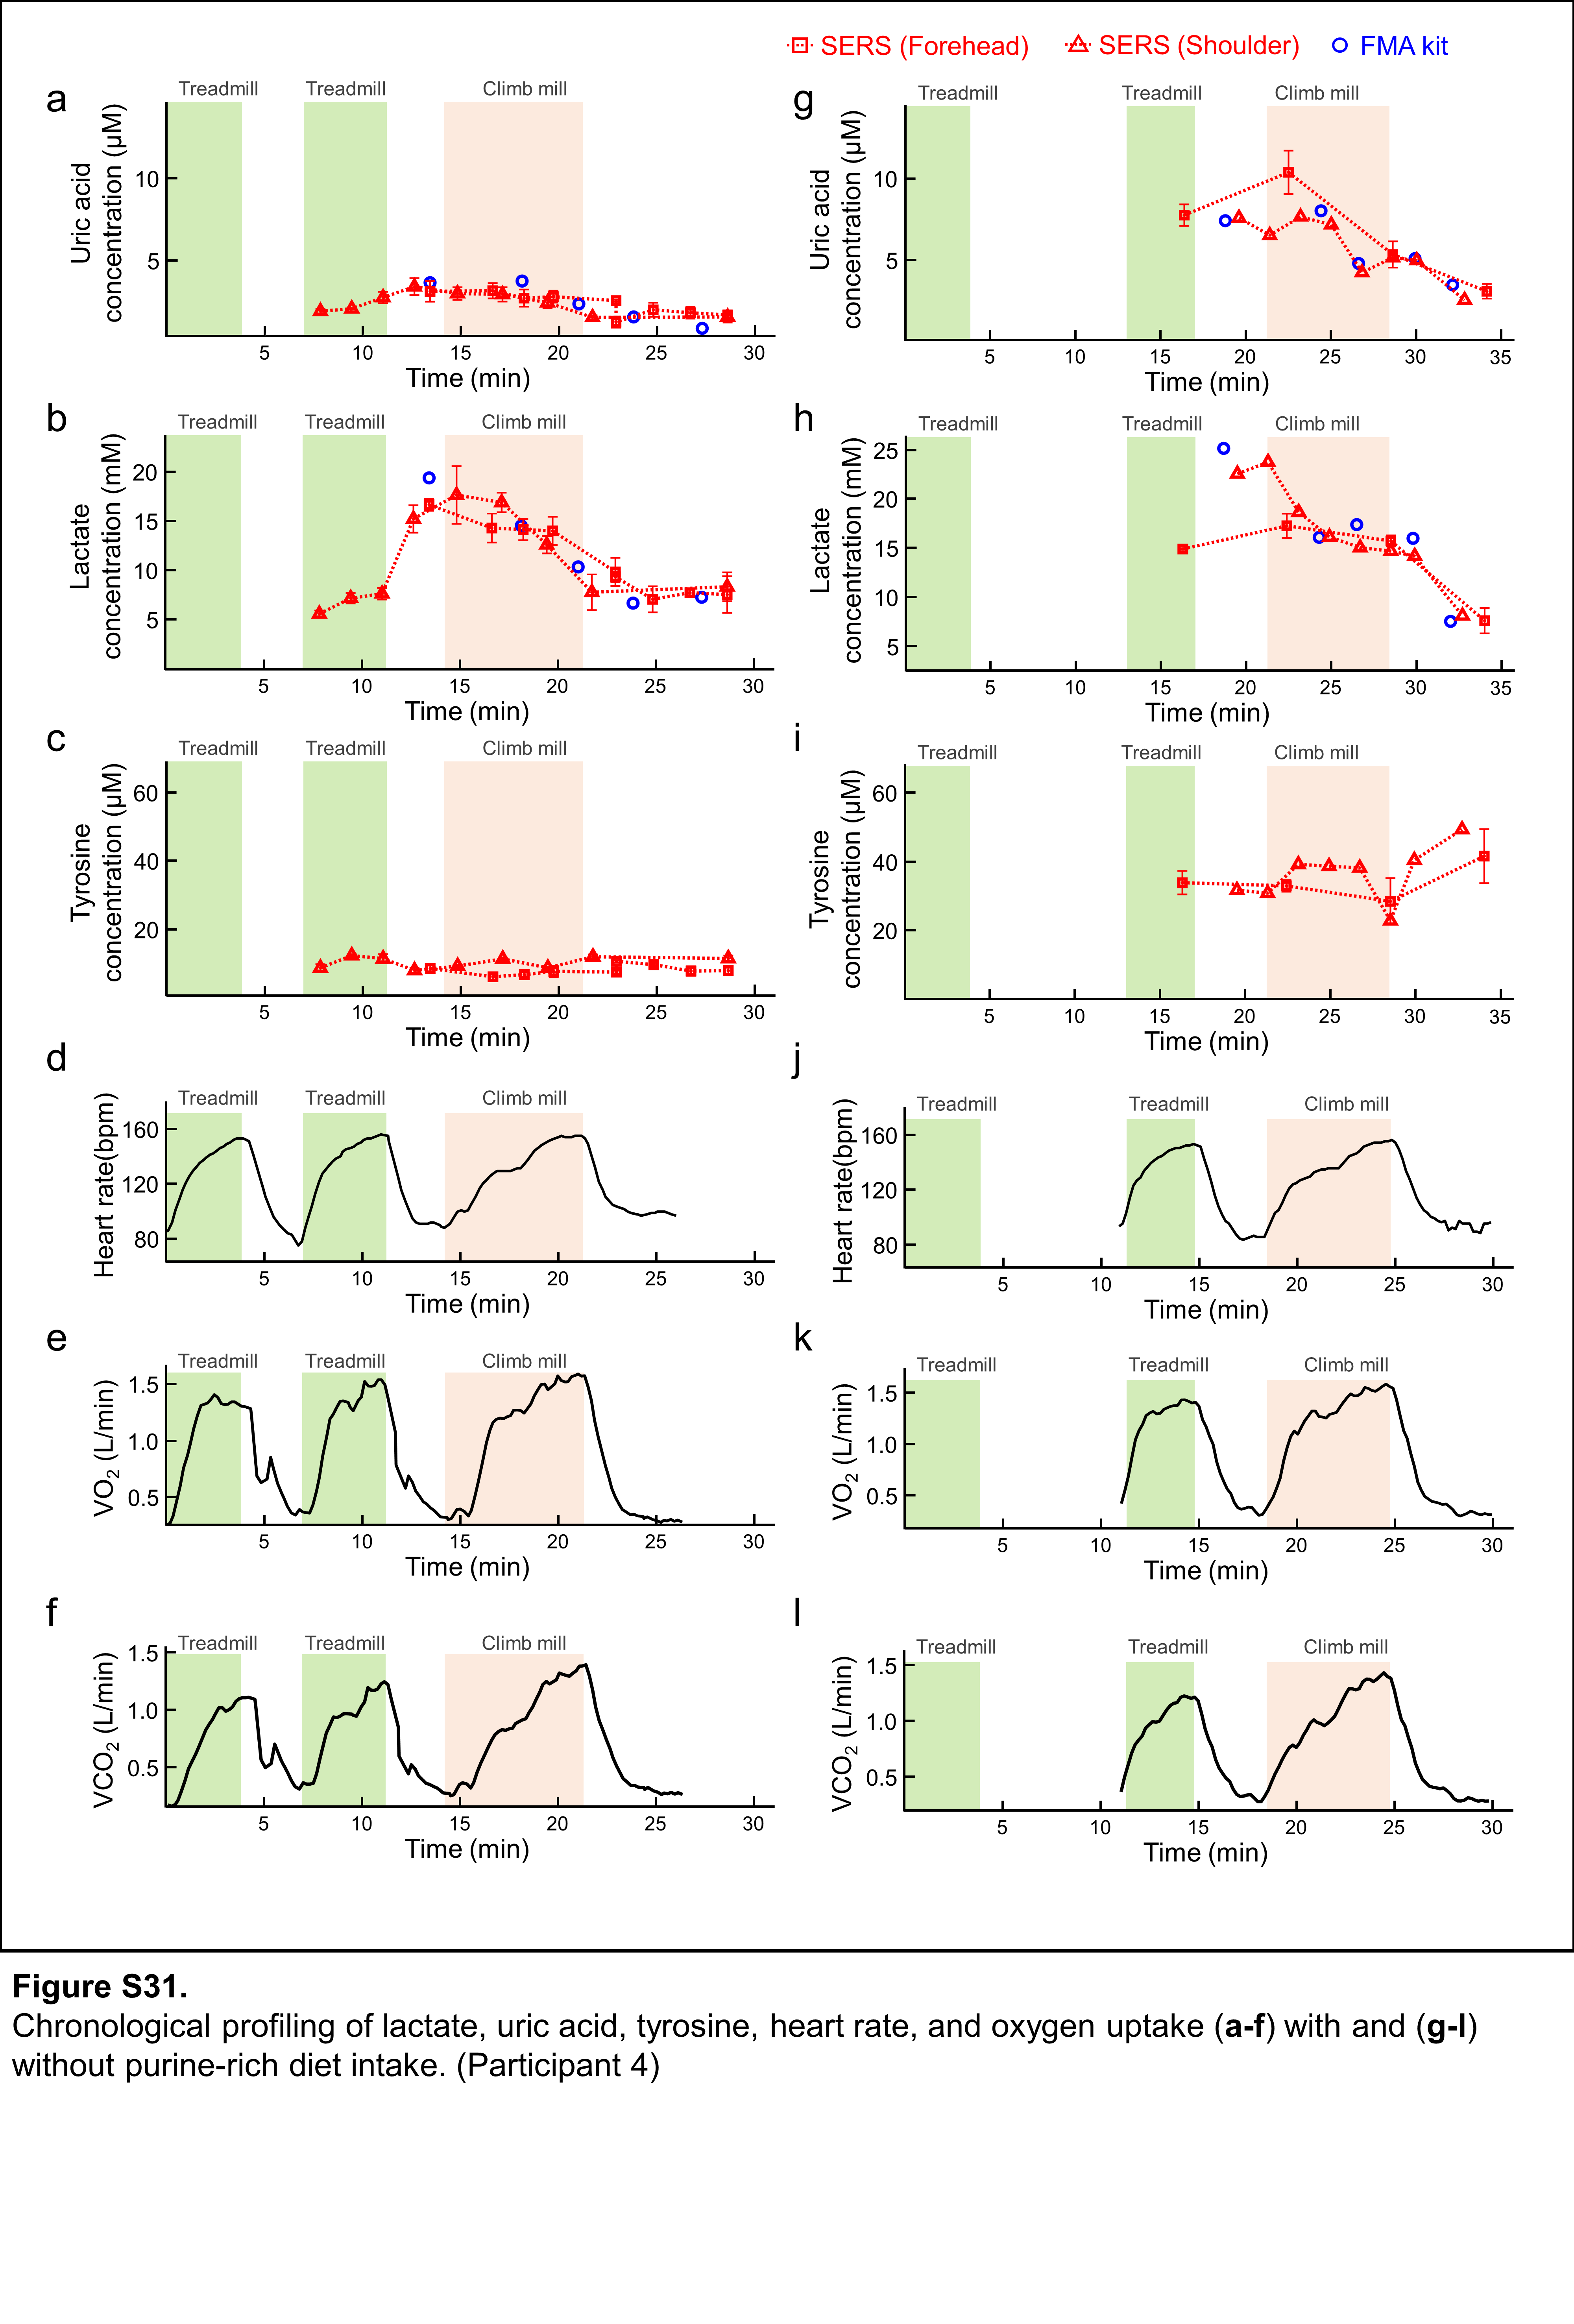


**Figure S33.** Chronological profiling of lactate, uric acid, tyrosine, heart rate, oxygen (VO2), and carbon dioxide (VCO2) uptake under (**a**-**f**) fasting condition and (**g**-**l**) purine-rich diet intake (Participant 4). The error bars represent one standard deviation from the mean.

|  | SERS substrate | Flexibility | Functional microfluidic  compatibility | Label | Analytes |
| --- | --- | --- | --- | --- | --- |
| CEP-SERS patch | Ag nanoislands on  fluorocarbon-coated  PDMS | High | High | Label-free | Multiple metabolites  - Uric acid  - Lactate  - Tyrosine |
| Y. Wang et al.,  *Sci. Adv.* (2021) [46] | Ag nanocube  in hydrogel film | High | Not demonstrated  (Low) | Label-free | Single drug  - Nicotine |
| U. Mogera et al.,  *Sci. Adv.* (2022) [58] | Au nanorod  on paper | High | Low | Label-free | Single metabolite  - Uric acid |
| X. He et al.,  *npj Flex. Elect.*  (2022) [54] | Ag nanomushroom  on Si wafer | Mediocre | Mediocre  (Simple assembly) | Label-free  & probe molecule | Dual metabolites & pH  - Urea  - Lactate |
| J. Xiao et al.,  *ACS Sens.* (2023) [53] | Au nanomushroom  on Si wafer | Mediocre | Mediocre  (Simple assembly) | Label-free | Single drug  - Acetaminophen |
| W. Yu et al.,  *Biosens. & Bioelect.*  (2024) [48] | Core-shell Au nanorod  on textile | High | Not demonstrated  (Low) | SERS tag (Label) | Dual metabolites  - Lactate  - Glucose |
| Z. Chen et al.,  *Lab Chip* (2024) [52] | Ag nanowire  on paper | High | Low | Label-free | Single metabolite  - Uric acid |
| H. Ye et al.,  *Nano Letters* (2024)  [53] | Au nanoparticle  on PDMS | High | Mediocre  (Simple assembly) | Label-free & probe molecule | Single metabolite & pH  - Lactate |
| M. Hu et al.,  *Biosens. & Bioelect*(2024) [55] | Au @ Ag nanocubes  on silk | High | Mediocre  (Simple assembly) | Label-free | Dual metabolites  - Creatinine  - Uric acid |
| H. Zhang et al.,  *Nano Letters* (2024)  [57] | Template printed  Au nanowire  on PDMS | High | Mediocre  (Simple assembly) | Probe molecule | pH |
| G. Li et al.,  *Nano Letters* (2024)  [60] | Au & Al2O3 trimers  in hydrogel | High | Mediocre  (Simple assembly) | Label-free | Dual metabolites  - Lactate  - Uric acid |

**Table S1.** Comparison of recent advances in wearable SERS patch for human sweat analysis. Previously reported wearable SERS patches still encounter several major challenges to accomplish precise sweat profiling: (1) Absence of an all-flexible SERS patch compatible with sophisticated functional microfluidic channels limits precise fluid control, restricting accurate quantification and time-resolved analysis. (2) The high molecular complexity of sweat hinders the multiplexed quantification of metabolites.
